# Supplementary material for: Millions of Decisions: The Level and Trajectory of Racial Discrimination Since 1910
Source: Research Square preprint supplement (doi:10.21203/rs.3.rs-6839225/v1), 2025-07-28
Supplement: Supplementary file 1 [file 138b7af72f30f9e0f2fa8840.xlsx]

## Sheet: Contents
Supplementary Data Table 1. Mean era-level discrimation estimates (as r-values), along with standard errors and 95% confidence intervals overall, by domain, by by method
Supplementary Data Table 2. Decision-weighted meta regression using random effect models of effect size of race (anti-black discrimination) on time, adjusting for domain of activity and method of measurements
Supplementary Data Table 3. Unweighted meta regression using random effect models of effect size of race (anti-black discrimination) on time, adjusting for domain of activity and method of measurements
Supplementary Data Table 4. Domain-specific decision-weighted meta regression using random effect models of effect size of race (anti-black discrimination) on time, adjusting for domain of activity and method of measurements
Supplementary Data Table 5. Method-specific decision-weighted meta regression using random effect models of effect size of race (anti-black discrimination) on time, adjusting for domain of activity and method of measurements
Supplementary Data Table 6. Summary of statistical significance using 95% confidence levels by era
Supplementary Data Table 7. Meta-database
Supplementary Data Table 8. Summary effect size and tau-squared measures of variance overall, by era, and by method
Supplementary Data Table 9. Distribution of t-statistics
Supplementary Data Table 10. Citations of sources used to generate estimates

## Sheet: SD1
Supplementary Data Table 1. Mean era-level discrimation estimates (as r-values), along with standard errors and 95% confidence intervals overall, by domain, by by method
	rw_	sew_	lw_	uw_	nw_	r_	se_	l_	u_	n_	model	era	cat	method	era_num
label	r, weighted	std error, weighted	lower bound of 95% CI, weighted	upper bound of 95% CI, weighted	number of estimates	r, unweighted	std error, unweighted	lower bound of 95% CI, unweighted	upper bound of 95% CI, unweighted	number of estimates
all	0.53263	0.0326972	0.467874	0.597385	118	0.643323	0.0309873	0.581955	0.704692	118	jim	jim	all	0	1
child education	0.121084	0.059185	-0.0058553	0.248023	15	0.385761	0.0954144	0.181117	0.590404	15	jim_ed	jim	ed	0	1
financial market					0					0	jim_fm	jim	fm	0	1
higher education	0.860541	0.0430203	0.764686	0.956397	11	0.90176	0.035672	0.822278	0.981242	11	jim_he	jim	he	0	1
housing market	0.602366	0.0542667	0.488355	0.716376	19	0.618095	0.0528312	0.507101	0.729089	19	jim_hm	jim	hm	0	1
law enforcement	-0.00881409	0.0117706	-0.0462733	0.0286451	4	-0.0013004	0.0106938	-0.0353328	0.032732	4	jim_le	jim	le	0	1
labor market	0.736748	0.0407334	0.654656	0.818841	45	0.829104	0.0417965	0.744869	0.913339	45	jim_lm	jim	lm	0	1
mate selection	0.965641				1	0.965641				1	jim_ms	jim	ms	0	1
voting	0.523501	0.0251548	0.469885	0.577117	16	0.380505	0.0435103	0.287765	0.473245	16	jim_vo	jim	vo	0	1
audit	0.303315				1	0.303315				1	jim_aud	jim	aud	1	1
success rate	-0.00901288	0.0144389	-0.0711385	0.0531128	3	-0.00454214	0.0144117	-0.0665507	0.0574664	3	jim_hit	jim	hit	1	1
model-adjusted	0.00842481				1	0.00842481				1	jim_mod	jim	mod	1	1
observe disparity	0.16124	0.0861956	-0.0284758	0.350955	12	0.397074	0.11927	0.134563	0.659586	12	jim_obs	jim	obs	1	1
policy	0.786609	0.0329022	0.720936	0.852282	68	0.77217	0.0373823	0.697554	0.846785	68	jim_pol	jim	pol	1	1
survey	0.557233	0.0340065	0.487964	0.626502	33	0.555807	0.0326217	0.489358	0.622255	33	jim_srv	jim	srv	1	1
all	0.216352	0.0191043	0.178621	0.254083	160	0.156416	0.0209966	0.114947	0.197884	160	civ	civ	all	0	2
child education	0.010245	0.00115578	0.00527203	0.0152179	3	0.0107806	0.00121298	0.0055616	0.0159997	3	civ_ed	civ	ed	0	2
financial market	0.096487	0.0273982	0.00929386	0.18368	4	0.0870859	0.0315411	-0.013292	0.187464	4	civ_fm	civ	fm	0	2
higher education	-0.349036	0.0772835	-0.5477	-0.150372	6	-0.303018	0.0829071	-0.516138	-0.0898986	6	civ_he	civ	he	0	2
housing market	0.152813	0.0270547	0.0973017	0.208325	28	0.17754	0.0247926	0.12667	0.22841	28	civ_hm	civ	hm	0	2
law enforcement	0.0135122	0.00635017	-0.00150361	0.0285279	8	-0.00304134	0.0128205	-0.033357	0.0272743	8	civ_le	civ	le	0	2
labor market	0.0626763	0.013721	0.0352303	0.0901224	61	-0.0139911	0.0224412	-0.0588802	0.030898	61	civ_lm	civ	lm	0	2
mate selection	0.492264	0.0193463	0.453064	0.531463	38	0.492264	0.0193463	0.453064	0.531463	38	civ_ms	civ	ms	0	2
voting	0.313009	0.0358032	0.233235	0.392784	11	0.285806	0.0441356	0.187466	0.384146	11	civ_vo	civ	vo	0	2
audit	0.02844	0.0458478	-0.0837455	0.140626	7	0.0495	0.0495509	-0.0717466	0.170747	7	civ_aud	civ	aud	1	2
success rate	0.0093967	0.0280365	-0.056899	0.0756924	8	-0.0548888	0.0539855	-0.182544	0.0727665	8	civ_hit	civ	hit	1	2
model-adjusted	-0.0290945	0.0140558	-0.0572202	-0.00096885	60	0.0347102	0.0184199	-0.00214784	0.0715682	60	civ_mod	civ	mod	1	2
observe disparity	0.0102412	0.000950279	0.00721699	0.0132654	4	0.00808548	0.00282835	-0.000915585	0.0170866	4	civ_obs	civ	obs	1	2
policy	0	0	0	0	2	0	0	0	0	2	civ_pol	civ	pol	1	2
survey	0.41512	0.0169488	0.381378	0.448863	79	0.291192	0.0333414	0.224814	0.357569	79	civ_srv	civ	srv	1	2
all	0.00986487	0.00289095	0.004162	0.0155677	189	0.0203658	0.0099233	0.000790518	0.0399412	189	now	now	all	0	3
child education	0.00422662	0.00422408	-0.0092163	0.0176695	4	-0.0112886	0.0168787	-0.0650042	0.042427	4	now_ed	now	ed	0	3
financial market	0.0127345	0.0121844	-0.0170797	0.0425487	7	0.0339224	0.0346124	-0.0507712	0.118616	7	now_fm	now	fm	0	3
higher education	-0.145395	0.0377629	-0.250241	-0.040548	5	-0.330888	0.109262	-0.634248	-0.027528	5	now_he	now	he	0	3
housing market	0.0132589	0.00461903	0.0037972	0.0227205	29	0.0370951	0.0130467	0.0103702	0.0638201	29	now_hm	now	hm	0	3
law enforcement	0.00765244	0.00382447	2.08296e-05	0.015284	69	-0.00769781	0.00776688	-0.0231964	0.00780075	69	now_le	now	le	0	3
labor market	0.0235776	0.00586441	0.0117509	0.0354043	44	-0.0153491	0.0188267	-0.0533168	0.0226186	44	now_lm	now	lm	0	3
mate selection	0.132607	0.0414745	0.0446856	0.220529	17	0.236638	0.0394256	0.15306	0.320217	17	now_ms	now	ms	0	3
voting	0.00732805	0.0159029	-0.0293441	0.0440002	9	0.1387	0.0192228	0.0943717	0.183028	9	now_vo	now	vo	0	3
audit	0.0249918	0.00439851	0.0161328	0.0338509	46	0.0346371	0.0131064	0.0082395	0.0610346	46	now_aud	now	aud	1	3
success rate	-0.0314567	0.00377101	-0.0389925	-0.023921	64	-0.0210747	0.00902346	-0.0391066	-0.00304273	64	now_hit	now	hit	1	3
model-adjusted	0.0232018	0.00199343	0.0191915	0.0272121	48	0.0233514	0.00930662	0.00462892	0.0420739	48	now_mod	now	mod	1	3
observe disparity	0.00422662	0.00422408	-0.0092163	0.0176695	4	-0.0112886	0.0168787	-0.0650042	0.042427	4	now_obs	now	obs	1	3
policy	-0.477586	0.197622	-2.98862	2.03345	2	-0.517925	0.201698	-3.08074	2.04489	2	now_pol	now	pol	1	3
survey	0.31343	0.0250624	0.261704	0.365156	25	0.14259	0.0492975	0.0408451	0.244335	25	now_srv	now	srv	1	3

## Sheet: SD2
Supplementary Data Table 2. Decision-weighted meta regression using random effect models of effect size of race (anti-black discrimination) on time, adjusting for domain of activity and method of measurements. rows correspond to beta values; t-statistics; 95% confidence intervals; p-values. Values are Fisher's Z statistics. Weights are calculated as the inverse of the variance, using Hunter-Schmi…										Re-converted correlations from Fisher's Z
	1	2	3	4	5	6	7	8		1	2	3	4	5	6	7	8
				Restricted to 1965 and later				Restricted to 1965 and later
Post civil-rights era (omitted category is Jim Crow era)	-1.212	-1.405	-0.523							-0.837278	-0.886428	-0.480012
	(-53.408)	(-65.191)	(-22.225)
	-1.256 -1.168	-1.448 -1.363	-0.569 -0.477
	(0.0000)	(0.0000)	(0.0000)
21st Century (omitted category is Jim Crow era)	-1.371	-1.437	-0.517	-0.096						-0.87892	-0.893092	-0.475381	-0.0957062
	(-62.641)	(-66.159)	(-20.259)	(-15.690)
	-1.413 -1.328	-1.480 -1.395	-0.567 -0.467	-0.108 -0.084
	(0.0000)	(0.0000)	(0.0000)	(0.0000)
Year of study					-0.019	-0.021	-0.008	-0.005						-0.0189977	-0.0209969	-0.00799983	-0.00499996
					(-67.709)	(-73.086)	(-22.568)	(-24.278)
					-0.020 -0.019	-0.021 -0.020	-0.009 -0.007	-0.005 -0.004
					(0.0000)	(0.0000)	(0.0000)	(0.0000)
domain==driver behavior		-0.252	-0.145	0.040		0.147	0.001	0.090
		(-1.487)	(-1.074)	(0.587)		(0.872)	(0.008)	(1.338)
		-0.584 0.080	-0.409 0.120	-0.093 0.172		-0.183 0.476	-0.265 0.267	-0.042 0.222
		(0.1370)	(0.2830)	(0.5571)		(0.3829)	(0.9934)	(0.1808)
domain==education		-0.882	-0.369	0.053		-0.714	-0.207	-0.117
		(-22.575)	(-6.781)	(1.080)		(-18.583)	(-3.851)	(-6.978)
		-0.959 -0.805	-0.475 -0.262	-0.043 0.149		-0.789 -0.639	-0.312 -0.102	-0.150 -0.084
		(0.0000)	(0.0000)	(0.2802)		(0.0000)	(0.0001)	(0.0000)
domain==financial market		-0.208	-0.087	0.108		-0.095	0.011	0.130
		(-4.099)	(-2.151)	(7.171)		(-1.872)	(0.276)	(8.781)
		-0.308 -0.109	-0.167 -0.008	0.078 0.137		-0.194 0.004	-0.069 0.091	0.101 0.159
		(0.0000)	(0.0314)	(0.0000)		(0.0612)	(0.7829)	(0.0000)
domain==government services		-0.502	-0.080	-0.001		-0.127	-0.011	0.003
		(-4.101)	(-0.826)	(-0.014)		(-1.046)	(-0.117)	(0.094)
		-0.741 -0.262	-0.270 0.110	-0.074 0.073		-0.364 0.111	-0.202 0.179	-0.068 0.075
		(0.0000)	(0.4089)	(0.9888)		(0.2958)	(0.9072)	(0.9255)
domain==healthcare		-0.804	-1.343	0.000		-0.967	-1.406	0.000
		(-7.061)	(-15.566)	(.)		(-8.549)	(-16.175)	(.)
		-1.027 -0.581	-1.512 -1.174	0.000 0.000		-1.189 -0.745	-1.576 -1.235	0.000 0.000
		(0.0000)	(0.0000)	(.)		(0.0000)	(0.0000)	(.)
domain==higher education		-0.279	-0.565	-0.294		0.011	-0.432	-0.259
		(-7.465)	(-19.229)	(-19.606)		(0.310)	(-14.201)	(-17.566)
		-0.353 -0.206	-0.623 -0.508	-0.323 -0.265		-0.061 0.084	-0.492 -0.372	-0.288 -0.230
		(0.0000)	(0.0000)	(0.0000)		(0.7565)	(0.0000)	(0.0000)
domain==housing market		-0.321	-0.259	0.070		-0.245	-0.204	0.087
		(-14.033)	(-14.143)	(8.521)		(-10.767)	(-11.066)	(10.916)
		-0.365 -0.276	-0.295 -0.223	0.054 0.086		-0.289 -0.200	-0.240 -0.168	0.071 0.103
		(0.0000)	(0.0000)	(0.0000)		(0.0000)	(0.0000)	(0.0000)
domain==law enforcement		-0.331	-0.153	0.114		-0.047	-0.002	0.140
		(-13.624)	(-4.183)	(8.726)		(-1.971)	(-0.056)	(10.947)
		-0.379 -0.284	-0.225 -0.082	0.088 0.140		-0.094 -0.000	-0.074 0.070	0.115 0.165
		(0.0000)	(0.0000)	(0.0000)		(0.0487)	(0.9555)	(0.0000)
domain==mate selection		0.191	0.095	0.306		0.115	0.107	0.336
		(7.353)	(3.852)	(28.740)		(4.518)	(4.316)	(32.710)
		0.140 0.242	0.047 0.144	0.285 0.327		0.065 0.165	0.058 0.156	0.316 0.356
		(0.0000)	(0.0001)	(0.0000)		(0.0000)	(0.0000)	(0.0000)
domain==retail		-0.664	-0.180	0.183		-0.386	-0.060	0.198
		(-10.626)	(-3.657)	(5.920)		(-6.249)	(-1.226)	(6.487)
		-0.787 -0.542	-0.277 -0.084	0.123 0.244		-0.507 -0.265	-0.156 0.036	0.138 0.258
		(0.0000)	(0.0003)	(0.0000)		(0.0000)	(0.2202)	(0.0000)
domain==transportation		-0.222	-0.115	0.070		0.156	0.023	0.115
		(-1.376)	(-0.922)	(1.577)		(0.973)	(0.182)	(2.647)
		-0.538 0.094	-0.359 0.129	-0.017 0.156		-0.158 0.469	-0.223 0.269	0.030 0.200
		(0.1689)	(0.3565)	(0.1149)		(0.3307)	(0.8555)	(0.0081)
domain==voting		-0.451	-0.504	0.070		-0.325	-0.428	0.106
		(-13.872)	(-17.408)	(4.662)		(-10.083)	(-14.611)	(7.245)
		-0.515 -0.387	-0.561 -0.448	0.041 0.100		-0.389 -0.262	-0.486 -0.371	0.077 0.134
		(0.0000)	(0.0000)	(0.0000)		(0.0000)	(0.0000)	(0.0000)
Uses stereotypical Black names to indicate race			-0.070	0.076			0.049	0.113
			(-1.922)	(5.422)			(1.341)	(8.101)
			-0.141 0.001	0.049 0.103			-0.023 0.120	0.085 0.140
			(0.0546)	(0.0000)			(0.1801)	(0.0000)
Uses experimental audit or similar method			-0.273	-0.152			-0.211	-0.118
			(-8.350)	(-11.048)			(-6.532)	(-8.935)
			-0.337 -0.209	-0.179 -0.125			-0.275 -0.148	-0.144 -0.092
			(0.0000)	(0.0000)			(0.0000)	(0.0000)
Adjusts for decision-level variables			-0.268	-0.186			-0.280	-0.163
			(-12.321)	(-20.239)			(-13.176)	(-18.592)
			-0.311 -0.226	-0.204 -0.168			-0.322 -0.238	-0.180 -0.146
			(0.0000)	(0.0000)			(0.0000)	(0.0000)
Uses observed disparity to indicate discrimination			-0.126	-0.206			-0.215
			(-2.287)	(-4.307)			(-3.903)
			-0.234 -0.018	-0.300 -0.113			-0.324 -0.107
			(0.0222)	(0.0000)			(0.0001)
Uses intitutional policies to measure discrimination			1.294	0.029			1.305	-0.059
			(48.765)	(0.775)			(49.750)	(-1.625)
			1.242 1.346	-0.044 0.102			1.254 1.356	-0.131 0.012
			(0.0000)	(0.4382)			(0.0000)	(0.1041)
Uses success rate differences to indicate discrimination			-0.299	-0.247			-0.287	-0.206
			(-7.339)	(-16.806)			(-7.070)	(-14.328)
			-0.378 -0.219	-0.276 -0.219			-0.366 -0.207	-0.235 -0.178
			(0.0000)	(0.0000)			(0.0000)	(0.0000)
Constant	1.396	1.687	0.933	0.206	38.964	41.847	16.507	9.803
	(80.467)	(89.158)	(39.823)	(21.514)	(68.428)	(74.346)	(23.429)	(24.845)
	1.362 1.430	1.650 1.724	0.887 0.979	0.188 0.225	37.848 40.080	40.744 42.950	15.126 17.888	9.030 10.576
	(0.0000)	(0.0000)	(0.0000)	(0.0000)	(0.0000)	(0.0000)	(0.0000)	(0.0000)
Sample Size	467.000	467.000	467.000	349.000	467.000	467.000	467.000	349.000
rows correspond to beta values; t-statistics; 95% confidence intervals; p-values.

## Sheet: SD3
Supplementary Data Table 3. Equal-weighted meta regression using random effect models of effect size of race (anti-black discrimination) on time, adjusting for domain of activity and method of measurements. rows correspond to beta values; t-statistics; 95% confidence intervals; p-values. Values are Fisher's Z statistics. Weights are calculated as the inverse of the variance, which is forced to be…										Re-converted correlations from Fisher's Z
	1	2	3	4	5	6	7	8		1	2	3	4	5	6	7	8
				Restricted to 1964 and later				Restricted to 1964 and later
Post civil-rights era	-1.159	-1.368	-0.621							-0.820714	-0.878236	-0.551824
	(-16.114)	(-19.346)	(-7.290)
	-1.300 -1.018	-1.506 -1.229	-0.788 -0.454
	(0.0000)	(0.0000)	(0.0000)
21st century	-1.311	-1.401	-0.623	-0.138						-0.864528	-0.885568	-0.553213	-0.137131
	(-18.842)	(-19.612)	(-6.857)	(-7.269)
	-1.447 -1.174	-1.541 -1.261	-0.801 -0.445	-0.175 -0.101
	(0.0000)	(0.0000)	(0.0000)	(0.0000)
Year of study					-0.019	-0.020	-0.010	-0.006						-0.0189977	-0.0199973	-0.00999967	-0.00599993
					(-21.071)	(-21.479)	(-7.878)	(-10.603)
					-0.021 -0.017	-0.022 -0.019	-0.012 -0.007	-0.007 -0.005
					(0.0000)	(0.0000)	(0.0000)	(0.0000)
domain==driver behavior		-0.224	-0.111	0.078		0.168	0.058	0.132
		(-0.414)	(-0.234)	(0.544)		(0.307)	(0.124)	(0.986)
		-1.288 0.839	-1.041 0.818	-0.203 0.359		-0.902 1.238	-0.867 0.984	-0.130 0.395
		(0.6792)	(0.8147)	(0.5864)		(0.7585)	(0.9016)	(0.3240)
domain==education		-0.808	-0.396	0.077		-0.639	-0.216	0.089
		(-6.432)	(-1.961)	(0.514)		(-5.110)	(-1.095)	(1.629)
		-1.054 -0.562	-0.792 -0.000	-0.217 0.371		-0.884 -0.394	-0.602 0.171	-0.018 0.196
		(0.0000)	(0.0499)	(0.6075)		(0.0000)	(0.2737)	(0.1032)
domain==financial market		-0.181	-0.068	0.151		-0.069	0.053	0.175
		(-1.067)	(-0.441)	(3.219)		(-0.400)	(0.351)	(3.990)
		-0.515 0.152	-0.368 0.233	0.059 0.243		-0.405 0.267	-0.245 0.352	0.089 0.261
		(0.2862)	(0.6591)	(0.0013)		(0.6889)	(0.7257)	(0.0001)
domain==government services		-0.514	-0.119	0.016		-0.147	-0.021	0.017
		(-1.338)	(-0.356)	(0.111)		(-0.381)	(-0.064)	(0.129)
		-1.268 0.239	-0.773 0.536	-0.264 0.295		-0.905 0.610	-0.671 0.629	-0.244 0.278
		(0.1810)	(0.7222)	(0.9116)		(0.7035)	(0.9492)	(0.8977)
domain==healthcare		-0.740	-1.185	0.000		-0.908	-1.269	0.000
		(-1.915)	(-3.547)	(.)		(-2.329)	(-3.812)	(.)
		-1.498 0.017	-1.840 -0.530	0.000 0.000		-1.673 -0.144	-1.921 -0.616	0.000 0.000
		(0.0555)	(0.0004)	(.)		(0.0199)	(0.0001)	(.)
domain==higher education		-0.262	-0.556	-0.236		0.029	-0.386	-0.188
		(-2.116)	(-5.014)	(-4.596)		(0.234)	(-3.390)	(-3.905)
		-0.505 -0.019	-0.773 -0.339	-0.337 -0.135		-0.214 0.272	-0.609 -0.163	-0.283 -0.094
		(0.0343)	(0.0000)	(0.0000)		(0.8153)	(0.0007)	(0.0001)
domain==housing market		-0.286	-0.221	0.164		-0.212	-0.157	0.169
		(-3.763)	(-3.244)	(6.811)		(-2.758)	(-2.331)	(7.581)
		-0.436 -0.137	-0.354 -0.087	0.117 0.211		-0.362 -0.061	-0.289 -0.025	0.126 0.213
		(0.0002)	(0.0012)	(0.0000)		(0.0058)	(0.0197)	(0.0000)
domain==law enforcement		-0.302	-0.142	0.171		-0.024	0.042	0.197
		(-3.734)	(-1.010)	(3.779)		(-0.299)	(0.305)	(4.668)
		-0.461 -0.144	-0.417 0.134	0.082 0.260		-0.182 0.134	-0.229 0.313	0.114 0.280
		(0.0002)	(0.3127)	(0.0002)		(0.7650)	(0.7603)	(0.0000)
domain==mate selection		0.217	0.135	0.510		0.145	0.147	0.513
		(2.505)	(1.516)	(17.154)		(1.686)	(1.672)	(18.762)
		0.047 0.387	-0.039 0.309	0.452 0.569		-0.024 0.314	-0.025 0.320	0.459 0.566
		(0.0123)	(0.1296)	(0.0000)		(0.0919)	(0.0945)	(0.0000)
domain==retail		-0.596	-0.183	0.282		-0.333	-0.054	0.302
		(-2.847)	(-0.985)	(3.360)		(-1.585)	(-0.294)	(3.855)
		-1.007 -0.186	-0.546 0.181	0.117 0.446		-0.744 0.079	-0.411 0.304	0.148 0.455
		(0.0044)	(0.3246)	(0.0008)		(0.1131)	(0.7688)	(0.0001)
domain==transportation		-0.195	-0.081	0.108		0.177	0.078	0.156
		(-0.359)	(-0.172)	(0.752)		(0.325)	(0.166)	(1.163)
		-1.258 0.869	-1.011 0.848	-0.173 0.389		-0.893 1.247	-0.847 1.003	-0.107 0.418
		(0.7199)	(0.8638)	(0.4521)		(0.7454)	(0.8684)	(0.2446)
domain==voting		-0.545	-0.723	0.306		-0.411	-0.632	0.304
		(-5.418)	(-7.657)	(7.586)		(-4.080)	(-6.662)	(8.218)
		-0.742 -0.348	-0.908 -0.538	0.227 0.385		-0.609 -0.214	-0.818 -0.446	0.232 0.377
		(0.0000)	(0.0000)	(0.0000)		(0.0000)	(0.0000)	(0.0000)
Uses stereotypical Black names to indicate race			-0.044	0.098			0.094	0.139
			(-0.328)	(2.376)			(0.715)	(3.566)
			-0.304 0.217	0.017 0.179			-0.164 0.353	0.062 0.215
			(0.7430)	(0.0175)			(0.4744)	(0.0004)
Uses experimental audit or similar method			-0.257	0.068			-0.179	0.069
			(-2.224)	(1.757)			(-1.582)	(1.969)
			-0.483 -0.030	-0.008 0.143			-0.401 0.043	0.000 0.137
			(0.0261)	(0.0788)			(0.1136)	(0.0490)
Adjusts for decision-level variables			-0.241	0.011			-0.262	0.003
			(-3.148)	(0.439)			(-3.519)	(0.114)
			-0.392 -0.091	-0.040 0.062			-0.407 -0.116	-0.044 0.049
			(0.0016)	(0.6607)			(0.0004)	(0.9090)
Uses observed disparity to indicate discrimination			-0.025	0.009			-0.128
			(-0.122)	(0.065)			(-0.633)
			-0.425 0.375	-0.269 0.287			-0.525 0.269
			(0.9030)	(0.9478)			(0.5267)
Uses intitutional policies to measure discrimination			1.080	-0.130			1.078	-0.180
			(11.389)	(-1.594)			(11.606)	(-2.367)
			0.894 1.266	-0.290 0.030			0.896 1.260	-0.328 -0.031
			(0.0000)	(0.1109)			(0.0000)	(0.0179)
Uses success rate differences to indicate discrimination			-0.265	-0.053			-0.259	-0.044
			(-1.737)	(-1.068)			(-1.715)	(-0.963)
			-0.564 0.034	-0.149 0.044			-0.554 0.037	-0.134 0.046
			(0.0824)	(0.2853)			(0.0863)	(0.3357)
Constant	1.331	1.624	0.989	-0.009	37.676	41.040	20.181	12.105
	(24.383)	(25.899)	(11.717)	(-0.383)	(21.297)	(21.822)	(8.108)	(10.596)
	1.224 1.438	1.501 1.746	0.823 1.154	-0.057 0.038	34.209 41.144	37.354 44.726	15.303 25.059	9.866 14.345
	(0.0000)	(0.0000)	(0.0000)	(0.7018)	(0.0000)	(0.0000)	(0.0000)	(0.0000)
Sample Size	467.000	467.000	467.000	349.000	467.000	467.000	467.000	349.000
k number of parameters
rows correspond to beta values; t-statistics; 95% confidence intervals; p-values.

## Sheet: SD4
Supplementary Data Table 4. Domain-specific decision-weighted meta regression using random effect models of effect size of race (anti-black discrimination) on time, adjusting for domain of activity and method of measurements. rows correspond to beta values; t-statistics; 95% confidence intervals; p-values. Limited to domains with at least 10 observations. Weights use the Hunter-Schmidt method. Fi…										Re-converted correlations from Fisher's Z
	(1)	(2)	(3)	(4)	(5)	(6)	(7)	(8)		1	2	3	4	5	6	7	8
	education	financial market	higher education	housing market	labor market	law enforcement	mate selection	voting		-0.332823	0.0169984	-0.953865	-0.496763	-0.617528	0.00599993	-0.899387	-0.284894
Post civil-rights era	-0.346	0.017	-1.873	-0.545	-0.721	0.006	-1.469	-0.293
	(-5.801)	(0.722)	(-12.685)	(-9.122)	(-3.490)	(0.526)	(-10.664)	(-7.891)
	-0.463 -0.229	-0.029 0.063	-2.163 -1.584	-0.662 -0.428	-1.126 -0.316	-0.018 0.031	-1.739 -1.199	-0.365 -0.220
	(0.0000)	(0.4701)	(0.0000)	(0.0000)	(0.0005)	(0.5986)	(0.0000)	(0.0000)		-0.352241	0	-0.953685	-0.511678	-0.638715	-0.00299999	-0.930888	-0.451832
21st century	-0.368	0.000	-1.871	-0.565	-0.756	-0.003	-1.665	-0.487
	(-6.809)	(.)	(-13.125)	(-6.852)	(-3.326)	(-0.321)	(-11.724)	(-12.852)
	-0.474 -0.262	0.000 0.000	-2.150 -1.591	-0.726 -0.403	-1.202 -0.311	-0.022 0.016	-1.943 -1.387	-0.562 -0.413
	(0.0000)	(.)	(0.0000)	(0.0000)	(0.0009)	(0.7483)	(0.0000)	(0.0000)
Uses stereotypical Black names to indicate race	0.000	0.000	0.000	0.097	0.035	0.000	0.000	0.000
	(.)	(.)	(.)	(0.968)	(0.181)	(.)	(.)	(.)
	0.000 0.000	0.000 0.000	0.000 0.000	-0.099 0.293	-0.342 0.412	0.000 0.000	0.000 0.000	0.000 0.000
	(.)	(.)	(.)	(0.3329)	(0.8567)	(.)	(.)	(.)
Uses experimental audit or similar method	0.000	0.000	0.000	-0.215	0.262	0.000	0.000	0.000
	(.)	(.)	(.)	(-2.529)	(1.434)	(.)	(.)	(.)
	0.000 0.000	0.000 0.000	0.000 0.000	-0.382 -0.048	-0.096 0.620	0.000 0.000	0.000 0.000	0.000 0.000
	(.)	(.)	(.)	(0.0114)	(0.1516)	(.)	(.)	(.)
Adjusts for decision-level variables	0.000	0.163	0.345	-0.236	0.291	0.048	-0.313	0.000
	(.)	(6.584)	(2.256)	(-4.110)	(2.028)	(7.341)	(-4.497)	(.)
	0.000 0.000	0.115 0.212	0.045 0.645	-0.348 -0.123	0.010 0.573	0.035 0.060	-0.450 -0.177	0.000 0.000
	(.)	(0.0000)	(0.0241)	(0.0000)	(0.0426)	(0.0000)	(0.0000)	(.)
Uses observed disparity to indicate discrimination	-0.157	0.000	0.000	0.000	0.306	0.000	0.000	0.000
	(-2.754)	(.)	(.)	(.)	(0.778)	(.)	(.)	(.)
	-0.269 -0.045	0.000 0.000	0.000 0.000	0.000 0.000	-0.465 1.078	0.000 0.000	0.000 0.000	0.000 0.000
	(0.0059)	(.)	(.)	(.)	(0.4367)	(.)	(.)	(.)
Uses intitutional policies to measure discrimination	0.000	0.000	0.495	0.091	2.228	0.000	0.000	-0.282
	(.)	(.)	(3.399)	(1.323)	(11.285)	(.)	(.)	(-5.194)
	0.000 0.000	0.000 0.000	0.210 0.781	-0.044 0.225	1.841 2.615	0.000 0.000	0.000 0.000	-0.388 -0.175
	(.)	(.)	(0.0007)	(0.1859)	(0.0000)	(.)	(.)	(0.0000)
Constant	0.514	-0.087	1.237	0.820	0.484	-0.010	2.023	0.622
	(10.849)	(-4.183)	(8.461)	(17.093)	(2.753)	(-1.057)	(14.879)	(19.721)
	0.421 0.607	-0.128 -0.046	0.950 1.523	0.726 0.914	0.139 0.828	-0.028 0.009	1.757 2.290	0.560 0.684
	(0.0000)	(0.0000)	(0.0000)	(0.0000)	(0.0059)	(0.2904)	(0.0000)	(0.0000)
Sample Size	22.000	11.000	22.000	76.000	150.000	81.000	56.000	36.000
k number of parameters
rows correspond to beta values; t-statistics; 95% confidence intervals; p-values.

## Sheet: SD5
Supplementary Data Table 5. Method-specific decision-weighted meta regression using random effect models of effect size of race (anti-black discrimination) on time, adjusting for domain of activity and method of measurements. rows correspond to beta values; t-statistics; 95% confidence intervals; p-values. Weights use the Hunter-Schmidt method. Fisher's z values are used for the effects.										Re-converted correlations from Fisher's Z
	(1)	(2)	(3)	(4)	(5)	(6)				1	2	3	4	5	6
	audit	model-adjusted	observed disparity	policy	self-reported	success rate
Post civil-rights era	-0.272	-0.004	-0.423	-1.071	-0.621	0.006				-0.265485	-0.00399998	-0.399455	-0.789838	-0.551824	0.00599993
	(-1.441)	(-0.172)	(-9.170)	(-1.954)	(-11.593)	(0.265)
	-0.642 0.098	-0.048 0.040	-0.513 -0.333	-2.145 0.004	-0.726 -0.516	-0.036 0.047
	(0.1495)	(0.8633)	(0.0000)	(0.0508)	(0.0000)	(0.7911)
21st century	-0.333	0.037	-0.378	-2.326	-0.781	-0.009				-0.321214	0.0369831	-0.360969	-0.981095	-0.65328	-0.00899976
	(-1.769)	(1.675)	(-8.265)	(-4.030)	(-11.738)	(-0.521)
	-0.702 0.036	-0.006 0.080	-0.467 -0.288	-3.457 -1.195	-0.911 -0.650	-0.043 0.025
	(0.0768)	(0.0939)	(0.0000)	(0.0001)	(0.0000)	(0.6027)
Uses stereotypical Black names to indicate race	0.057	0.000	0.000	0.000	0.000	0.000
	(3.791)	(.)	(.)	(.)	(.)	(.)
	0.027 0.086	0.000 0.000	0.000 0.000	0.000 0.000	0.000 0.000	0.000 0.000
	(0.0002)	(.)	(.)	(.)	(.)	(.)
domain==driver behavior	0.019	0.000	0.000	0.000	0.000	0.000
	(0.288)	(.)	(.)	(.)	(.)	(.)
	-0.108 0.145	0.000 0.000	0.000 0.000	0.000 0.000	0.000 0.000	0.000 0.000
	(0.7737)	(.)	(.)	(.)	(.)	(.)
domain==education	0.000	0.000	-0.290	0.000	0.043	0.000
	(.)	(.)	(-4.859)	(.)	(0.359)	(.)
	0.000 0.000	0.000 0.000	-0.408 -0.173	0.000 0.000	-0.192 0.278	0.000 0.000
	(.)	(.)	(0.0000)	(.)	(0.7195)	(.)
domain==financial market	0.000	0.035	0.000	0.000	0.000	-0.074
	(.)	(3.608)	(.)	(.)	(.)	(-2.997)
	0.000 0.000	0.016 0.054	0.000 0.000	0.000 0.000	0.000 0.000	-0.122 -0.025
	(.)	(0.0003)	(.)	(.)	(.)	(0.0027)
domain==government services	-0.002	0.000	0.000	0.000	0.336	0.000
	(-0.084)	(.)	(.)	(.)	(1.414)	(.)
	-0.060 0.055	0.000 0.000	0.000 0.000	0.000 0.000	-0.130 0.801	0.000 0.000
	(0.9333)	(.)	(.)	(.)	(0.1575)	(.)
domain==healthcare	0.000	0.000	0.000	-1.827	0.000	0.000
	(.)	(.)	(.)	(-3.425)	(.)	(.)
	0.000 0.000	0.000 0.000	0.000 0.000	-2.873 -0.782	0.000 0.000	0.000 0.000
	(.)	(.)	(.)	(0.0006)	(.)	(.)
domain==higher education	0.000	-0.336	0.000	-0.999	0.356	-0.408
	(.)	(-43.678)	(.)	(-3.866)	(1.659)	(-17.783)
	0.000 0.000	-0.352 -0.321	0.000 0.000	-1.506 -0.493	-0.065 0.777	-0.453 -0.363
	(.)	(0.0000)	(.)	(0.0001)	(0.0971)	(0.0000)
domain==housing market	0.055	-0.022	0.000	-1.801	0.423	0.000
	(3.649)	(-3.659)	(.)	(-6.566)	(7.120)	(.)
	0.025 0.084	-0.033 -0.010	0.000 0.000	-2.338 -1.263	0.306 0.539	0.000 0.000
	(0.0003)	(0.0003)	(.)	(0.0000)	(0.0000)	(.)
domain==law enforcement	0.000	-0.003	0.000	0.000	0.000
	(.)	(-0.435)	(.)	(.)	(.)
	0.000 0.000	-0.018 0.011	0.000 0.000	0.000 0.000	0.000 0.000
	(.)	(0.6635)	(.)	(.)	(.)
domain==mate selection	0.000	-0.013	0.000	0.000	0.737	0.000
	(.)	(-1.410)	(.)	(.)	(13.535)	(.)
	0.000 0.000	-0.031 0.005	0.000 0.000	0.000 0.000	0.630 0.843	0.000 0.000
	(.)	(0.1586)	(.)	(.)	(0.0000)	(.)
domain==retail	0.075	0.570	0.000	0.000	0.136	0.000
	(2.354)	(9.613)	(.)	(.)	(1.157)	(.)
	0.013 0.138	0.453 0.686	0.000 0.000	0.000 0.000	-0.094 0.367	0.000 0.000
	(0.0186)	(0.0000)	(.)	(.)	(0.2471)	(.)
domain==transportation	0.048	0.000	0.000	0.000	0.000	0.000
	(1.243)	(.)	(.)	(.)	(.)	(.)
	-0.028 0.125	0.000 0.000	0.000 0.000	0.000 0.000	0.000 0.000	0.000 0.000
	(0.2140)	(.)	(.)	(.)	(.)	(.)
domain==voting	0.000	0.000	0.000	-2.310	0.434	0.000
	(.)	(.)	(.)	(-9.395)	(6.946)	(.)
	0.000 0.000	0.000 0.000	0.000 0.000	-2.791 -1.828	0.312 0.557	0.000 0.000
	(.)	(.)	(.)	(0.0000)	(0.0000)	(.)
Constant	0.313	0.012	0.657	2.711	0.448	-0.005
	(1.668)	(0.511)	(11.212)	(21.852)	(8.080)	(-0.272)
	-0.055 0.681	-0.033 0.056	0.542 0.772	2.468 2.954	0.339 0.556	-0.038 0.029
	(0.0954)	(0.6091)	(0.0000)	(0.0000)	(0.0000)	(0.7858)
Sample Size	54.000	109.000	20.000	72.000	137.000	75.000
k number of parameters
rows correspond to beta values; t-statistics; 95% confidence intervals; p-values.

## Sheet: SD6
Supplementary Data Table 6. Summary of statistical significance using 95% confidence levels by era
era	Percent negative and significant (anti-White)	Percent positive and significant (anti-Black)	n	Cumulative studies with significant negative result (anti-White)	Cumulative studies with significant positive result (anti-Black)	R if negative (anti-White discrimination), unweighted mean	R if positive (anti-Black discrimination), unweighted mean	Absolute t-stat	T-stat
Jim Crow	0.00847458	0.898305	118	1	106	-0.0163386	0.66039	594.448	594.217
Post-Civil Rights era	0.142857	0.57764	161	19	96	-0.161292	0.265397	58.8177	57.555
21st century	0.260638	0.505319	188	50	95	-0.0872908	0.0851423	19.6336	6.64399

## Sheet: SD7
Supplementary Data Table 7. Meta-database
						sample used for meta-analysis (correspondents to number of decisions)						n used in effect-size calculation														effect is from publication					not a decision	subset of United States (drop from final analysis)
year	desirability_of_outcome	era	domain	subdomain	measure	sample	units	relevant_subgroup	mean_effect_of_black	se_effect	tstat	n used in effect-size calculation	parameters	degree_freedom	partial_r	fisher_z	se_fisher	up_bound_fisher	low_bound_fisher	var_r	se_r	up_bound	low_bound	comment	citation	literature	category	how race indictated	survey_item	not_best_model	structural_estimate	regional
2017	bad	21st century	driver behavior	probability of yeilding to pedestrian	how race affects yielding behavior of drivers	320	attempt to cross street	pedestrians	-0.02	0.717327	-0.0278813	320	2	317	-0.00156597	-0.00156597	0.0561656	0.108519	-0.111651	0.0559891	0.00313	0.00456861	-0.00770054	Results from number of cars passing without yielding in unmarked crosswalk. Other results are similar. Ttesti command calculated in STATA to test for differences by race, pooled across gender.	Kahn, K. B., McMahon, J., Goddard, T. B., & Adkins, A. (2017). Racial Bias in Drivers' Yielding Behavior at Crosswalks: Understanding the Effect (No. NITC-RR-869). National Institute for Transportation and Communities.	1	audit	actual
1850	good	Pre-Civil War era	education	access to public education	Black and White enrollment rate differences among elementary and middle-school-aged children	41217	Black and White children aged 6 to 13	children in U.S. south	-0.472225	0.0350231	-13.4832	13380	15	13365	-0.115845	-0.116367	0.00864611	-0.0994207	-0.133313	0.00852944	7.37e-05	-0.1157	-0.115989	Enrollment rate for Black vs White children of school-age 6-13 as indicator of discrimination in access to public schooling	Steven Ruggles, Sarah Flood, Matthew Sobek, Daniel Backman, Annie Chen, Grace Cooper, Stephanie Richards, Renae Rodgers, and Megan Schouweiler. IPUMS USA: Version 15.0 [Decennial Census from 1850-2010 and 2023 American Community Survey]. Minneapolis, MN: IPUMS, 2024. https://doi.org/10.18128/D010.V15.0	0	observed disparity	actual				1
1850	good	Pre-Civil War era	education	access to public education	Black and White enrollment rate differences among elementary and middle-school-aged children	41217	Black and White children aged 6 to 13	children	-0.387311	0.0425953	-9.09282	41217	36	41181	-0.0447625	-0.0447924	0.00492581	-0.0351379	-0.054447	0.00491582	2.42e-05	-0.0447151	-0.04481	Enrollment rate for Black vs White children of school-age 6-13 as indicator of discrimination in access to public schooling	Steven Ruggles, Sarah Flood, Matthew Sobek, Daniel Backman, Annie Chen, Grace Cooper, Stephanie Richards, Renae Rodgers, and Megan Schouweiler. IPUMS USA: Version 15.0 [Decennial Census from 1850-2010 and 2023 American Community Survey]. Minneapolis, MN: IPUMS, 2024. https://doi.org/10.18128/D010.V15.0	0	observed disparity	actual
1850	good	Pre-Civil War era	education	access to public education	Black and White enrollment rate differences among elementary and middle-school-aged children	27837	Black and White children aged 6 to 13	children outside U.S. south	-0.286019	0.0433103	-6.60395	27837	20	27816	-0.0395654	-0.0395861	0.00599394	-0.027838	-0.0513342	0.00598434	3.59e-05	-0.0394951	-0.0396357	Enrollment rate for Black vs White children of school-age 6-13 as indicator of discrimination in access to public schooling	Steven Ruggles, Sarah Flood, Matthew Sobek, Daniel Backman, Annie Chen, Grace Cooper, Stephanie Richards, Renae Rodgers, and Megan Schouweiler. IPUMS USA: Version 15.0 [Decennial Census from 1850-2010 and 2023 American Community Survey]. Minneapolis, MN: IPUMS, 2024. https://doi.org/10.18128/D010.V15.0	0	observed disparity	actual				1
1860	good	Pre-Civil War era	education	access to public education	Black and White enrollment rate differences among elementary and middle-school-aged children	52932	Black and White children aged 6 to 13	children in U.S. south	-0.479412	0.0146878	-32.6401	15596	16	15580	-0.252991	-0.258606	0.0080082	-0.24291	-0.274302	0.00749516	6e-05	-0.252873	-0.253109	Enrollment rate for Black vs White children of school-age 6-13 as indicator of discrimination in access to public schooling	Steven Ruggles, Sarah Flood, Matthew Sobek, Daniel Backman, Annie Chen, Grace Cooper, Stephanie Richards, Renae Rodgers, and Megan Schouweiler. IPUMS USA: Version 15.0 [Decennial Census from 1850-2010 and 2023 American Community Survey]. Minneapolis, MN: IPUMS, 2024. https://doi.org/10.18128/D010.V15.0	0	observed disparity	actual				1
1860	good	Pre-Civil War era	education	access to public education	Black and White enrollment rate differences among elementary and middle-school-aged children	52932	Black and White children aged 6 to 13	children	-0.376053	0.0339215	-11.086	52932	45	52887	-0.0481499	-0.0481872	0.00434663	-0.0396678	-0.0567066	0.00433648	1.88e-05	-0.048113	-0.0481869	Enrollment rate for Black vs White children of school-age 6-13 as indicator of discrimination in access to public schooling	Steven Ruggles, Sarah Flood, Matthew Sobek, Daniel Backman, Annie Chen, Grace Cooper, Stephanie Richards, Renae Rodgers, and Megan Schouweiler. IPUMS USA: Version 15.0 [Decennial Census from 1850-2010 and 2023 American Community Survey]. Minneapolis, MN: IPUMS, 2024. https://doi.org/10.18128/D010.V15.0	0	observed disparity	actual
1860	good	Pre-Civil War era	education	access to public education	Black and White enrollment rate differences among elementary and middle-school-aged children	37336	Black and White children aged 6 to 13	children outside U.S. south	-0.256507	0.0224593	-11.421	37336	28	37307	-0.0590269	-0.0590956	0.00517552	-0.0489516	-0.0692396	0.00515734	2.67e-05	-0.0589746	-0.0590792	Enrollment rate for Black vs White children of school-age 6-13 as indicator of discrimination in access to public schooling	Steven Ruggles, Sarah Flood, Matthew Sobek, Daniel Backman, Annie Chen, Grace Cooper, Stephanie Richards, Renae Rodgers, and Megan Schouweiler. IPUMS USA: Version 15.0 [Decennial Census from 1850-2010 and 2023 American Community Survey]. Minneapolis, MN: IPUMS, 2024. https://doi.org/10.18128/D010.V15.0	0	observed disparity	actual				1
1870	good	Post-Civil War era	education	access to public education	Black and White enrollment rate differences among elementary and middle-school-aged children	77018	Black and White children aged 6 to 13	children in U.S. south	-0.235523	0.0194655	-12.0995	26860	15	26845	-0.0736468	-0.0737803	0.00610199	-0.0618205	-0.0857402	0.00606866	3.7e-05	-0.0735742	-0.0737193	Enrollment rate for Black vs White children of school-age 6-13 as indicator of discrimination in access to public schooling	Steven Ruggles, Sarah Flood, Matthew Sobek, Daniel Backman, Annie Chen, Grace Cooper, Stephanie Richards, Renae Rodgers, and Megan Schouweiler. IPUMS USA: Version 15.0 [Decennial Census from 1850-2010 and 2023 American Community Survey]. Minneapolis, MN: IPUMS, 2024. https://doi.org/10.18128/D010.V15.0	0	observed disparity	actual				1
1870	good	Post-Civil War era	education	access to public education	Black and White enrollment rate differences among elementary and middle-school-aged children	77018	Black and White children aged 6 to 13	children	-0.237777	0.0174329	-13.6396	77018	45	76973	-0.0491029	-0.0491424	0.0036034	-0.0420797	-0.0562051	0.00359466	1.3e-05	-0.0490775	-0.0491283	Enrollment rate for Black vs White children of school-age 6-13 as indicator of discrimination in access to public schooling	Steven Ruggles, Sarah Flood, Matthew Sobek, Daniel Backman, Annie Chen, Grace Cooper, Stephanie Richards, Renae Rodgers, and Megan Schouweiler. IPUMS USA: Version 15.0 [Decennial Census from 1850-2010 and 2023 American Community Survey]. Minneapolis, MN: IPUMS, 2024. https://doi.org/10.18128/D010.V15.0	0	observed disparity	actual
1870	good	Post-Civil War era	education	access to public education	Black and White enrollment rate differences among elementary and middle-school-aged children	50158	Black and White children aged 6 to 13	children outside U.S. south	-0.247824	0.0333997	-7.41994	50158	29	50128	-0.0331224	-0.0331345	0.00446522	-0.0243827	-0.0418864	0.00446023	1.99e-05	-0.0330834	-0.0331615	Enrollment rate for Black vs White children of school-age 6-13 as indicator of discrimination in access to public schooling	Steven Ruggles, Sarah Flood, Matthew Sobek, Daniel Backman, Annie Chen, Grace Cooper, Stephanie Richards, Renae Rodgers, and Megan Schouweiler. IPUMS USA: Version 15.0 [Decennial Census from 1850-2010 and 2023 American Community Survey]. Minneapolis, MN: IPUMS, 2024. https://doi.org/10.18128/D010.V15.0	0	observed disparity	actual				1
1880	good	Post-Civil War era	education	access to public education	Black and White enrollment rate differences among elementary and middle-school-aged children	97897	Black and White children aged 6 to 13	children in U.S. south	-0.20964	0.0163875	-12.7927	36442	15	36427	-0.066877	-0.0669769	0.00523862	-0.0567092	-0.0772446	0.00521505	2.73e-05	-0.0668234	-0.0669305	Enrollment rate for Black vs White children of school-age 6-13 as indicator of discrimination in access to public schooling	Steven Ruggles, Sarah Flood, Matthew Sobek, Daniel Backman, Annie Chen, Grace Cooper, Stephanie Richards, Renae Rodgers, and Megan Schouweiler. IPUMS USA: Version 15.0 [Decennial Census from 1850-2010 and 2023 American Community Survey]. Minneapolis, MN: IPUMS, 2024. https://doi.org/10.18128/D010.V15.0	0	observed disparity	actual				1
1880	good	Post-Civil War era	education	access to public education	Black and White enrollment rate differences among elementary and middle-school-aged children	97897	Black and White children aged 6 to 13	children	-0.209488	0.0148833	-14.0754	97897	47	97850	-0.0449511	-0.0449814	0.00319611	-0.038717	-0.0512457	0.00318962	1.02e-05	-0.0449311	-0.044971	Enrollment rate for Black vs White children of school-age 6-13 as indicator of discrimination in access to public schooling	Steven Ruggles, Sarah Flood, Matthew Sobek, Daniel Backman, Annie Chen, Grace Cooper, Stephanie Richards, Renae Rodgers, and Megan Schouweiler. IPUMS USA: Version 15.0 [Decennial Census from 1850-2010 and 2023 American Community Survey]. Minneapolis, MN: IPUMS, 2024. https://doi.org/10.18128/D010.V15.0	0	observed disparity	actual
1880	good	Post-Civil War era	education	access to public education	Black and White enrollment rate differences among elementary and middle-school-aged children	61455	Black and White children aged 6 to 13	children outside U.S. south	-0.205775	0.0404694	-5.0847	61455	31	61423	-0.020512	-0.0205149	0.00403396	-0.0126083	-0.0284215	0.0040322	1.63e-05	-0.0204801	-0.0205439	Enrollment rate for Black vs White children of school-age 6-13 as indicator of discrimination in access to public schooling	Steven Ruggles, Sarah Flood, Matthew Sobek, Daniel Backman, Annie Chen, Grace Cooper, Stephanie Richards, Renae Rodgers, and Megan Schouweiler. IPUMS USA: Version 15.0 [Decennial Census from 1850-2010 and 2023 American Community Survey]. Minneapolis, MN: IPUMS, 2024. https://doi.org/10.18128/D010.V15.0	0	observed disparity	actual				1
1900	good	Jim Crow	education	access to public education	Black and White enrollment rate differences among elementary and middle-school-aged children	134213	Black and White children aged 6 to 13	children in U.S. south	-0.171362	0.0179564	-9.54321	49968	16	49952	-0.0426601	-0.042686	0.0044737	-0.0339176	-0.0514545	0.00446547	2e-05	-0.042621	-0.0426993	Enrollment rate for Black vs White children of school-age 6-13 as indicator of discrimination in access to public schooling	Steven Ruggles, Sarah Flood, Matthew Sobek, Daniel Backman, Annie Chen, Grace Cooper, Stephanie Richards, Renae Rodgers, and Megan Schouweiler. IPUMS USA: Version 15.0 [Decennial Census from 1850-2010 and 2023 American Community Survey]. Minneapolis, MN: IPUMS, 2024. https://doi.org/10.18128/D010.V15.0	0	observed disparity	actual				1
1900	good	Jim Crow	education	access to public education	Black and White enrollment rate differences among elementary and middle-school-aged children	134213	Black and White children aged 6 to 13	children	-0.162073	0.0161588	-10.03	134213	51	134162	-0.0273731	-0.02738	0.00272965	-0.0220299	-0.0327301	0.00272759	7.45e-06	-0.0273586	-0.0273877	Enrollment rate for Black vs White children of school-age 6-13 as indicator of discrimination in access to public schooling	Steven Ruggles, Sarah Flood, Matthew Sobek, Daniel Backman, Annie Chen, Grace Cooper, Stephanie Richards, Renae Rodgers, and Megan Schouweiler. IPUMS USA: Version 15.0 [Decennial Census from 1850-2010 and 2023 American Community Survey]. Minneapolis, MN: IPUMS, 2024. https://doi.org/10.18128/D010.V15.0	0	observed disparity	actual
1900	good	Jim Crow	education	access to public education	Black and White enrollment rate differences among elementary and middle-school-aged children	84245	Black and White children aged 6 to 13	children outside U.S. south	-0.0878842	0.0168068	-5.22907	84245	34	84210	-0.0180166	-0.0180185	0.00344537	-0.0112656	-0.0247715	0.00344421	1.19e-05	-0.0179933	-0.0180398	Enrollment rate for Black vs White children of school-age 6-13 as indicator of discrimination in access to public schooling	Steven Ruggles, Sarah Flood, Matthew Sobek, Daniel Backman, Annie Chen, Grace Cooper, Stephanie Richards, Renae Rodgers, and Megan Schouweiler. IPUMS USA: Version 15.0 [Decennial Census from 1850-2010 and 2023 American Community Survey]. Minneapolis, MN: IPUMS, 2024. https://doi.org/10.18128/D010.V15.0	0	observed disparity	actual				1
1910	good	Jim Crow	education	access to public education	Black and White enrollment rate differences among elementary and middle-school-aged children	148944	Black and White children aged 6 to 13	children in U.S. south	-0.150278	0.0163761	-9.17663	56516	16	56500	-0.0385776	-0.0385968	0.00420655	-0.030352	-0.0468416	0.00420021	1.77e-05	-0.038543	-0.0386123	Enrollment rate for Black vs White children of school-age 6-13 as indicator of discrimination in access to public schooling	Steven Ruggles, Sarah Flood, Matthew Sobek, Daniel Backman, Annie Chen, Grace Cooper, Stephanie Richards, Renae Rodgers, and Megan Schouweiler. IPUMS USA: Version 15.0 [Decennial Census from 1850-2010 and 2023 American Community Survey]. Minneapolis, MN: IPUMS, 2024. https://doi.org/10.18128/D010.V15.0	0	observed disparity	actual				1
1910	good	Jim Crow	education	access to public education	Black and White enrollment rate differences among elementary and middle-school-aged children	148944	Black and White children aged 6 to 13	children	-0.139036	0.0149899	-9.27532	148944	51	148893	-0.0240307	-0.0240353	0.00259115	-0.0189567	-0.029114	0.00258964	6.71e-06	-0.0240175	-0.0240439	Enrollment rate for Black vs White children of school-age 6-13 as indicator of discrimination in access to public schooling	Steven Ruggles, Sarah Flood, Matthew Sobek, Daniel Backman, Annie Chen, Grace Cooper, Stephanie Richards, Renae Rodgers, and Megan Schouweiler. IPUMS USA: Version 15.0 [Decennial Census from 1850-2010 and 2023 American Community Survey]. Minneapolis, MN: IPUMS, 2024. https://doi.org/10.18128/D010.V15.0	0	observed disparity	actual
1910	good	Jim Crow	education	access to public education	Black and White enrollment rate differences among elementary and middle-school-aged children	92428	Black and White children aged 6 to 13	children outside U.S. south	-0.0435555	0.00868066	-5.01753	92428	34	92393	-0.0165048	-0.0165063	0.00328931	-0.0100593	-0.0229534	0.00328838	1.08e-05	-0.0164836	-0.016526	Enrollment rate for Black vs White children of school-age 6-13 as indicator of discrimination in access to public schooling	Steven Ruggles, Sarah Flood, Matthew Sobek, Daniel Backman, Annie Chen, Grace Cooper, Stephanie Richards, Renae Rodgers, and Megan Schouweiler. IPUMS USA: Version 15.0 [Decennial Census from 1850-2010 and 2023 American Community Survey]. Minneapolis, MN: IPUMS, 2024. https://doi.org/10.18128/D010.V15.0	0	observed disparity	actual				1
1920	good	Jim Crow	education	access to public education	Black and White enrollment rate differences among elementary and middle-school-aged children	174720	Black and White children aged 6 to 13	children in U.S. south	-0.11001	0.0183724	-5.9878	64132	16	64116	-0.0236408	-0.0236452	0.00394887	-0.0159055	-0.031385	0.0039466	1.56e-05	-0.0236103	-0.0236714	Enrollment rate for Black vs White children of school-age 6-13 as indicator of discrimination in access to public schooling	Steven Ruggles, Sarah Flood, Matthew Sobek, Daniel Backman, Annie Chen, Grace Cooper, Stephanie Richards, Renae Rodgers, and Megan Schouweiler. IPUMS USA: Version 15.0 [Decennial Census from 1850-2010 and 2023 American Community Survey]. Minneapolis, MN: IPUMS, 2024. https://doi.org/10.18128/D010.V15.0	0	observed disparity	actual				1
1920	good	Jim Crow	education	access to public education	Black and White enrollment rate differences among elementary and middle-school-aged children	174720	Black and White children aged 6 to 13	children	-0.097115	0.016532	-5.87436	174720	50	174670	-0.0140543	-0.0140552	0.00239239	-0.00936611	-0.0187443	0.00239191	5.72e-06	-0.0140431	-0.0140655	Enrollment rate for Black vs White children of school-age 6-13 as indicator of discrimination in access to public schooling	Steven Ruggles, Sarah Flood, Matthew Sobek, Daniel Backman, Annie Chen, Grace Cooper, Stephanie Richards, Renae Rodgers, and Megan Schouweiler. IPUMS USA: Version 15.0 [Decennial Census from 1850-2010 and 2023 American Community Survey]. Minneapolis, MN: IPUMS, 2024. https://doi.org/10.18128/D010.V15.0	0	observed disparity	actual
1920	good	Jim Crow	education	access to public education	Black and White enrollment rate differences among elementary and middle-school-aged children	110588	Black and White children aged 6 to 13	children outside U.S. south	-0.011997	0.00614003	-1.95389	110588	33	110554	-0.00587633	-0.0058764	0.00300713	1.76e-05	-0.0117704	0.003007	9.04e-06	-0.00585861	-0.00589405	Enrollment rate for Black vs White children of school-age 6-13 as indicator of discrimination in access to public schooling	Steven Ruggles, Sarah Flood, Matthew Sobek, Daniel Backman, Annie Chen, Grace Cooper, Stephanie Richards, Renae Rodgers, and Megan Schouweiler. IPUMS USA: Version 15.0 [Decennial Census from 1850-2010 and 2023 American Community Survey]. Minneapolis, MN: IPUMS, 2024. https://doi.org/10.18128/D010.V15.0	0	observed disparity	actual				1
1930	good	Jim Crow	education	access to public education	Black and White enrollment rate differences among elementary and middle-school-aged children	194521	Black and White children aged 6 to 13	children in U.S. south	-0.0681306	0.014395	-4.73295	68354	16	68338	-0.0181021	-0.0181041	0.00382497	-0.0106072	-0.0256011	0.00382366	1.46e-05	-0.0180735	-0.0181308	Enrollment rate for Black vs White children of school-age 6-13 as indicator of discrimination in access to public schooling	Steven Ruggles, Sarah Flood, Matthew Sobek, Daniel Backman, Annie Chen, Grace Cooper, Stephanie Richards, Renae Rodgers, and Megan Schouweiler. IPUMS USA: Version 15.0 [Decennial Census from 1850-2010 and 2023 American Community Survey]. Minneapolis, MN: IPUMS, 2024. https://doi.org/10.18128/D010.V15.0	0	observed disparity	actual				1
1930	good	Jim Crow	education	access to public education	Black and White enrollment rate differences among elementary and middle-school-aged children	194521	Black and White children aged 6 to 13	children	-0.0566	0.0120242	-4.70717	194521	50	194471	-0.0106735	-0.0106739	0.00226736	-0.00623	-0.015118	0.00226709	5.14e-06	-0.0106635	-0.0106836	Enrollment rate for Black vs White children of school-age 6-13 as indicator of discrimination in access to public schooling	Steven Ruggles, Sarah Flood, Matthew Sobek, Daniel Backman, Annie Chen, Grace Cooper, Stephanie Richards, Renae Rodgers, and Megan Schouweiler. IPUMS USA: Version 15.0 [Decennial Census from 1850-2010 and 2023 American Community Survey]. Minneapolis, MN: IPUMS, 2024. https://doi.org/10.18128/D010.V15.0	0	observed disparity	actual
1930	good	Jim Crow	education	access to public education	Black and White enrollment rate differences among elementary and middle-school-aged children	126167	Black and White children aged 6 to 13	children outside U.S. south	-0.0130696	0.0041962	-3.11463	126167	33	126133	-0.00876952	-0.00876975	0.00281535	-0.00325166	-0.0142878	0.00281511	7.93e-06	-0.00875399	-0.00878506	Enrollment rate for Black vs White children of school-age 6-13 as indicator of discrimination in access to public schooling	Steven Ruggles, Sarah Flood, Matthew Sobek, Daniel Backman, Annie Chen, Grace Cooper, Stephanie Richards, Renae Rodgers, and Megan Schouweiler. IPUMS USA: Version 15.0 [Decennial Census from 1850-2010 and 2023 American Community Survey]. Minneapolis, MN: IPUMS, 2024. https://doi.org/10.18128/D010.V15.0	0	observed disparity	actual				1
1940	good	Jim Crow	education	access to public education	Black and White enrollment rate differences among elementary and middle-school-aged children	191473	Black and White children aged 6 to 13	children in U.S. south	-0.0334909	0.0153174	-2.18647	72969	16	72953	-0.00809	-0.0081	0.00370203	-0.000839027	-0.015351	0.00370173	1.37e-05	-0.00806797	-0.00812169	Enrollment rate for Black vs White children of school-age 6-13 as indicator of discrimination in access to public schooling	Steven Ruggles, Sarah Flood, Matthew Sobek, Daniel Backman, Annie Chen, Grace Cooper, Stephanie Richards, Renae Rodgers, and Megan Schouweiler. IPUMS USA: Version 15.0 [Decennial Census from 1850-2010 and 2023 American Community Survey]. Minneapolis, MN: IPUMS, 2024. https://doi.org/10.18128/D010.V15.0	0	observed disparity	actual				1
1940	good	Jim Crow	education	access to public education	Black and White enrollment rate differences among elementary and middle-school-aged children	191473	Black and White children aged 6 to 13	children	-0.0267736	0.0120814	-2.2161	191473	48	191425	-0.00506506	-0.00506511	0.00228533	-0.000585852	-0.00954436	0.00228526	5.22e-06	-0.00505483	-0.0050753	Enrollment rate for Black vs White children of school-age 6-13 as indicator of discrimination in access to public schooling	Steven Ruggles, Sarah Flood, Matthew Sobek, Daniel Backman, Annie Chen, Grace Cooper, Stephanie Richards, Renae Rodgers, and Megan Schouweiler. IPUMS USA: Version 15.0 [Decennial Census from 1850-2010 and 2023 American Community Survey]. Minneapolis, MN: IPUMS, 2024. https://doi.org/10.18128/D010.V15.0	0	observed disparity	actual
1940	good	Jim Crow	education	access to public education	Black and White enrollment rate differences among elementary and middle-school-aged children	118504	Black and White children aged 6 to 13	children outside U.S. south	-0.00340891	0.00590637	-0.577159	118504	31	118472	-0.00167682	-0.00167682	0.00290495	0.00401688	-0.00737053	0.00290492	8.44e-06	-0.00166028	-0.00169336	Enrollment rate for Black vs White children of school-age 6-13 as indicator of discrimination in access to public schooling	Steven Ruggles, Sarah Flood, Matthew Sobek, Daniel Backman, Annie Chen, Grace Cooper, Stephanie Richards, Renae Rodgers, and Megan Schouweiler. IPUMS USA: Version 15.0 [Decennial Census from 1850-2010 and 2023 American Community Survey]. Minneapolis, MN: IPUMS, 2024. https://doi.org/10.18128/D010.V15.0	0	observed disparity	actual				1
1950	good	Jim Crow	education	access to public education	Black and White enrollment rate differences among elementary and middle-school-aged children	60324	Black and White children aged 6 to 13	children in U.S. south	-0.0136324	0.0080818	-1.6868	21649	16	21633	-0.0114677	-0.0114682	0.0067969	0.00185374	-0.0247901	0.0067957	4.62e-05	-0.0113772	-0.0115582	Enrollment rate for Black vs White children of school-age 6-13 as indicator of discrimination in access to public schooling	Steven Ruggles, Sarah Flood, Matthew Sobek, Daniel Backman, Annie Chen, Grace Cooper, Stephanie Richards, Renae Rodgers, and Megan Schouweiler. IPUMS USA: Version 15.0 [Decennial Census from 1850-2010 and 2023 American Community Survey]. Minneapolis, MN: IPUMS, 2024. https://doi.org/10.18128/D010.V15.0	0	observed disparity	actual				1
1950	good	Jim Crow	education	access to public education	Black and White enrollment rate differences among elementary and middle-school-aged children	60324	Black and White children aged 6 to 13	children	-0.008061	0.0059711	-1.35002	60324	48	60276	-0.00549871	-0.00549876	0.00407161	0.00248159	-0.0134791	0.00407142	1.66e-05	-0.00546621	-0.0055312	Enrollment rate for Black vs White children of school-age 6-13 as indicator of discrimination in access to public schooling	Steven Ruggles, Sarah Flood, Matthew Sobek, Daniel Backman, Annie Chen, Grace Cooper, Stephanie Richards, Renae Rodgers, and Megan Schouweiler. IPUMS USA: Version 15.0 [Decennial Census from 1850-2010 and 2023 American Community Survey]. Minneapolis, MN: IPUMS, 2024. https://doi.org/10.18128/D010.V15.0	0	observed disparity	actual
1950	good	Jim Crow	education	access to public education	Black and White enrollment rate differences among elementary and middle-school-aged children	38675	Black and White children aged 6 to 13	children outside U.S. south	-0.000493562	0.00773036	-0.0638473	38675	31	38643	-0.000324793	-0.000324793	0.00508513	0.00964205	-0.0102916	0.00508499	2.59e-05	-0.000274114	-0.000375472	Enrollment rate for Black vs White children of school-age 6-13 as indicator of discrimination in access to public schooling	Steven Ruggles, Sarah Flood, Matthew Sobek, Daniel Backman, Annie Chen, Grace Cooper, Stephanie Richards, Renae Rodgers, and Megan Schouweiler. IPUMS USA: Version 15.0 [Decennial Census from 1850-2010 and 2023 American Community Survey]. Minneapolis, MN: IPUMS, 2024. https://doi.org/10.18128/D010.V15.0	0	observed disparity	actual				1
1960	good	Jim Crow	education	access to public education	Black and White enrollment rate differences among elementary and middle-school-aged children	287100	Black and White children aged 6 to 13	children in U.S. south	-0.0134827	0.0039746	-3.39221	93760	16	93744	-0.0110786	-0.011079	0.00326586	-0.00467793	-0.0174801	0.00326543	1.07e-05	-0.0110577	-0.0110995	Enrollment rate for Black vs White children of school-age 6-13 as indicator of discrimination in access to public schooling	Steven Ruggles, Sarah Flood, Matthew Sobek, Daniel Backman, Annie Chen, Grace Cooper, Stephanie Richards, Renae Rodgers, and Megan Schouweiler. IPUMS USA: Version 15.0 [Decennial Census from 1850-2010 and 2023 American Community Survey]. Minneapolis, MN: IPUMS, 2024. https://doi.org/10.18128/D010.V15.0	0	observed disparity	actual				1
1960	good	Jim Crow	education	access to public education	Black and White enrollment rate differences among elementary and middle-school-aged children	287100	Black and White children aged 6 to 13	children	-0.0137276	0.002641	-5.19782	287100	50	287050	-0.00970112	-0.00970143	0.00186632	-0.00604345	-0.0133594	0.00186614	3.48e-06	-0.0096943	-0.00970795	Enrollment rate for Black vs White children of school-age 6-13 as indicator of discrimination in access to public schooling	Steven Ruggles, Sarah Flood, Matthew Sobek, Daniel Backman, Annie Chen, Grace Cooper, Stephanie Richards, Renae Rodgers, and Megan Schouweiler. IPUMS USA: Version 15.0 [Decennial Census from 1850-2010 and 2023 American Community Survey]. Minneapolis, MN: IPUMS, 2024. https://doi.org/10.18128/D010.V15.0	0	observed disparity	actual
1960	good	Jim Crow	education	access to public education	Black and White enrollment rate differences among elementary and middle-school-aged children	193340	Black and White children aged 6 to 13	children outside U.S. south	-0.0124441	0.0032365	-3.84493	193340	33	193306	-0.00874479	-0.00874502	0.00227427	-0.00428744	-0.0132026	0.00227409	5.17e-06	-0.00873466	-0.00875493	Enrollment rate for Black vs White children of school-age 6-13 as indicator of discrimination in access to public schooling	Steven Ruggles, Sarah Flood, Matthew Sobek, Daniel Backman, Annie Chen, Grace Cooper, Stephanie Richards, Renae Rodgers, and Megan Schouweiler. IPUMS USA: Version 15.0 [Decennial Census from 1850-2010 and 2023 American Community Survey]. Minneapolis, MN: IPUMS, 2024. https://doi.org/10.18128/D010.V15.0	0	observed disparity	actual				1
1970	good	Post-Civil Rights era	education	access to public education	Black and White enrollment rate differences among elementary and middle-school-aged children	329861	Black and White children aged 6 to 13	children in U.S. south	-0.0125624	0.0025938	-4.84332	104434	16	104418	-0.0149867	-0.0149878	0.00309446	-0.00892269	-0.021053	0.00309374	9.57e-06	-0.014968	-0.0150055	Enrollment rate for Black vs White children of school-age 6-13 as indicator of discrimination in access to public schooling	Steven Ruggles, Sarah Flood, Matthew Sobek, Daniel Backman, Annie Chen, Grace Cooper, Stephanie Richards, Renae Rodgers, and Megan Schouweiler. IPUMS USA: Version 15.0 [Decennial Census from 1850-2010 and 2023 American Community Survey]. Minneapolis, MN: IPUMS, 2024. https://doi.org/10.18128/D010.V15.0	0	observed disparity	actual				1
1970	good	Post-Civil Rights era	education	access to public education	Black and White enrollment rate differences among elementary and middle-school-aged children	329861	Black and White children aged 6 to 13	children	-0.0125682	0.0017582	-7.14817	329861	50	329811	-0.012446	-0.0124466	0.00174115	-0.00903396	-0.0158593	0.00174088	3.03e-06	-0.01244	-0.0124519	Enrollment rate for Black vs White children of school-age 6-13 as indicator of discrimination in access to public schooling	Steven Ruggles, Sarah Flood, Matthew Sobek, Daniel Backman, Annie Chen, Grace Cooper, Stephanie Richards, Renae Rodgers, and Megan Schouweiler. IPUMS USA: Version 15.0 [Decennial Census from 1850-2010 and 2023 American Community Survey]. Minneapolis, MN: IPUMS, 2024. https://doi.org/10.18128/D010.V15.0	0	observed disparity	actual
1970	good	Post-Civil Rights era	education	access to public education	Black and White enrollment rate differences among elementary and middle-school-aged children	225427	Black and White children aged 6 to 13	children outside U.S. south	-0.0128042	0.00245452	-5.21656	225427	33	225393	-0.0109872	-0.0109877	0.0021062	-0.00685951	-0.0151158	0.00210594	4.44e-06	-0.0109785	-0.0109959	Enrollment rate for Black vs White children of school-age 6-13 as indicator of discrimination in access to public schooling	Steven Ruggles, Sarah Flood, Matthew Sobek, Daniel Backman, Annie Chen, Grace Cooper, Stephanie Richards, Renae Rodgers, and Megan Schouweiler. IPUMS USA: Version 15.0 [Decennial Census from 1850-2010 and 2023 American Community Survey]. Minneapolis, MN: IPUMS, 2024. https://doi.org/10.18128/D010.V15.0	0	observed disparity	actual				1
1980	good	Post-Civil Rights era	education	access to public education	Black and White enrollment rate differences among elementary and middle-school-aged children	1372179	Black and White children aged 6 to 13	children in U.S. south	-0.0113088	0.000877	-12.8954	475829	16	475813	-0.0186914	-0.0186936	0.00144969	-0.0158522	-0.021535	0.00144918	2.1e-06	-0.0186873	-0.0186955	Enrollment rate for Black vs White children of school-age 6-13 as indicator of discrimination in access to public schooling	Steven Ruggles, Sarah Flood, Matthew Sobek, Daniel Backman, Annie Chen, Grace Cooper, Stephanie Richards, Renae Rodgers, and Megan Schouweiler. IPUMS USA: Version 15.0 [Decennial Census from 1850-2010 and 2023 American Community Survey]. Minneapolis, MN: IPUMS, 2024. https://doi.org/10.18128/D010.V15.0	0	observed disparity	actual				1
1980	good	Post-Civil Rights era	education	access to public education	Black and White enrollment rate differences among elementary and middle-school-aged children	1372179	Black and White children aged 6 to 13	children	-0.0101457	0.0007547	-13.4433	1372179	50	1372129	-0.0114757	-0.0114762	0.00085368	-0.00980301	-0.0131494	0.000853567	7.29e-07	-0.0114743	-0.0114771	Enrollment rate for Black vs White children of school-age 6-13 as indicator of discrimination in access to public schooling	Steven Ruggles, Sarah Flood, Matthew Sobek, Daniel Backman, Annie Chen, Grace Cooper, Stephanie Richards, Renae Rodgers, and Megan Schouweiler. IPUMS USA: Version 15.0 [Decennial Census from 1850-2010 and 2023 American Community Survey]. Minneapolis, MN: IPUMS, 2024. https://doi.org/10.18128/D010.V15.0	0	observed disparity	actual
1980	good	Post-Civil Rights era	education	access to public education	Black and White enrollment rate differences among elementary and middle-school-aged children	896350	Black and White children aged 6 to 13	children outside U.S. south	-0.0090472	0.00115256	-7.84965	896350	33	896316	-0.00829096	-0.00829115	0.00105624	-0.00622093	-0.0103614	0.00105616	1.12e-06	-0.00828878	-0.00829315	Enrollment rate for Black vs White children of school-age 6-13 as indicator of discrimination in access to public schooling	Steven Ruggles, Sarah Flood, Matthew Sobek, Daniel Backman, Annie Chen, Grace Cooper, Stephanie Richards, Renae Rodgers, and Megan Schouweiler. IPUMS USA: Version 15.0 [Decennial Census from 1850-2010 and 2023 American Community Survey]. Minneapolis, MN: IPUMS, 2024. https://doi.org/10.18128/D010.V15.0	0	observed disparity	actual				1
1990	good	Post-Civil Rights era	education	access to public education	Black and White enrollment rate differences among elementary and middle-school-aged children	1323415	Black and White children aged 6 to 13	children in U.S. south	-0.0114189	0.0013817	-8.26452	473758	16	473742	-0.0120065	-0.0120071	0.00145286	-0.00915945	-0.0148547	0.00145265	2.11e-06	-0.0120023	-0.0120106	Enrollment rate for Black vs White children of school-age 6-13 as indicator of discrimination in access to public schooling	Steven Ruggles, Sarah Flood, Matthew Sobek, Daniel Backman, Annie Chen, Grace Cooper, Stephanie Richards, Renae Rodgers, and Megan Schouweiler. IPUMS USA: Version 15.0 [Decennial Census from 1850-2010 and 2023 American Community Survey]. Minneapolis, MN: IPUMS, 2024. https://doi.org/10.18128/D010.V15.0	0	observed disparity	actual				1
1990	good	Post-Civil Rights era	education	access to public education	Black and White enrollment rate differences among elementary and middle-school-aged children	1323415	Black and White children aged 6 to 13	children	-0.0096061	0.0009917	-9.68678	1323415	50	1323365	-0.00842024	-0.00842044	0.000869266	-0.00671668	-0.0101242	0.000869203	7.56e-07	-0.00841876	-0.00842172	Enrollment rate for Black vs White children of school-age 6-13 as indicator of discrimination in access to public schooling	Steven Ruggles, Sarah Flood, Matthew Sobek, Daniel Backman, Annie Chen, Grace Cooper, Stephanie Richards, Renae Rodgers, and Megan Schouweiler. IPUMS USA: Version 15.0 [Decennial Census from 1850-2010 and 2023 American Community Survey]. Minneapolis, MN: IPUMS, 2024. https://doi.org/10.18128/D010.V15.0	0	observed disparity	actual
1990	good	Post-Civil Rights era	education	access to public education	Black and White enrollment rate differences among elementary and middle-school-aged children	849657	Black and White children aged 6 to 13	children outside U.S. south	-0.007786	0.0013019	-5.98048	849657	33	849623	-0.00648804	-0.00648813	0.00108487	-0.00436178	-0.00861448	0.00108483	1.18e-06	-0.00648574	-0.00649035	Enrollment rate for Black vs White children of school-age 6-13 as indicator of discrimination in access to public schooling	Steven Ruggles, Sarah Flood, Matthew Sobek, Daniel Backman, Annie Chen, Grace Cooper, Stephanie Richards, Renae Rodgers, and Megan Schouweiler. IPUMS USA: Version 15.0 [Decennial Census from 1850-2010 and 2023 American Community Survey]. Minneapolis, MN: IPUMS, 2024. https://doi.org/10.18128/D010.V15.0	0	observed disparity	actual				1
2000	good	21st century	education	access to public education	Black and White enrollment rate differences among elementary and middle-school-aged children	1468017	Black and White children aged 6 to 13	children in U.S. south	-0.0015194	0.0004019	-3.78046	538393	16	538377	-0.00515223	-0.00515228	0.00136286	-0.00248107	-0.00782349	0.00136282	1.86e-06	-0.00514859	-0.00515587	Enrollment rate for Black vs White children of school-age 6-13 as indicator of discrimination in access to public schooling	Steven Ruggles, Sarah Flood, Matthew Sobek, Daniel Backman, Annie Chen, Grace Cooper, Stephanie Richards, Renae Rodgers, and Megan Schouweiler. IPUMS USA: Version 15.0 [Decennial Census from 1850-2010 and 2023 American Community Survey]. Minneapolis, MN: IPUMS, 2024. https://doi.org/10.18128/D010.V15.0	0	observed disparity	actual				1
2000	good	21st century	education	access to public education	Black and White enrollment rate differences among elementary and middle-school-aged children	1468017	Black and White children aged 6 to 13	children	-0.0023038	0.0004073	-5.65629	1468017	50	1467967	-0.00466841	-0.00466844	0.000825344	-0.00305077	-0.00628612	0.000825325	6.81e-07	-0.00466707	-0.00466974	Enrollment rate for Black vs White children of school-age 6-13 as indicator of discrimination in access to public schooling	Steven Ruggles, Sarah Flood, Matthew Sobek, Daniel Backman, Annie Chen, Grace Cooper, Stephanie Richards, Renae Rodgers, and Megan Schouweiler. IPUMS USA: Version 15.0 [Decennial Census from 1850-2010 and 2023 American Community Survey]. Minneapolis, MN: IPUMS, 2024. https://doi.org/10.18128/D010.V15.0	0	observed disparity	actual
2000	good	21st century	education	access to public education	Black and White enrollment rate differences among elementary and middle-school-aged children	929624	Black and White children aged 6 to 13	children outside U.S. south	-0.0030345	0.000611951	-4.95872	929624	33	929590	-0.00514302	-0.00514307	0.00103716	-0.00311023	-0.00717591	0.00103714	1.08e-06	-0.00514091	-0.00514513	Enrollment rate for Black vs White children of school-age 6-13 as indicator of discrimination in access to public schooling	Steven Ruggles, Sarah Flood, Matthew Sobek, Daniel Backman, Annie Chen, Grace Cooper, Stephanie Richards, Renae Rodgers, and Megan Schouweiler. IPUMS USA: Version 15.0 [Decennial Census from 1850-2010 and 2023 American Community Survey]. Minneapolis, MN: IPUMS, 2024. https://doi.org/10.18128/D010.V15.0	0	observed disparity	actual				1
2010	good	21st century	education	access to public education	Black and White enrollment rate differences among elementary and middle-school-aged children	275181	Black and White children aged 6 to 13	children in U.S. south	-0.0031128	0.0018976	-1.64034	105833	16	105817	-0.00504256	-0.0050426	0.00307394	0.000982322	-0.0110675	0.00307383	9.45e-06	-0.00502404	-0.00506108	Enrollment rate for Black vs White children of school-age 6-13 as indicator of discrimination in access to public schooling	Steven Ruggles, Sarah Flood, Matthew Sobek, Daniel Backman, Annie Chen, Grace Cooper, Stephanie Richards, Renae Rodgers, and Megan Schouweiler. IPUMS USA: Version 15.0 [Decennial Census from 1850-2010 and 2023 American Community Survey]. Minneapolis, MN: IPUMS, 2024. https://doi.org/10.18128/D010.V15.0	0	observed disparity	actual				1
2010	good	21st century	education	access to public education	Black and White enrollment rate differences among elementary and middle-school-aged children	275181	Black and White children aged 6 to 13	children	-0.00406	0.0012643	-3.21135	275181	50	275131	-0.00612223	-0.0061223	0.00190631	-0.00238594	-0.00985867	0.00190623	3.63e-06	-0.0061151	-0.00612935	Enrollment rate for Black vs White children of school-age 6-13 as indicator of discrimination in access to public schooling	Steven Ruggles, Sarah Flood, Matthew Sobek, Daniel Backman, Annie Chen, Grace Cooper, Stephanie Richards, Renae Rodgers, and Megan Schouweiler. IPUMS USA: Version 15.0 [Decennial Census from 1850-2010 and 2023 American Community Survey]. Minneapolis, MN: IPUMS, 2024. https://doi.org/10.18128/D010.V15.0	0	observed disparity	actual
2010	good	21st century	education	access to public education	Black and White enrollment rate differences among elementary and middle-school-aged children	169348	Black and White children aged 6 to 13	children outside U.S. south	-0.00501275	0.00173548	-2.8884	169348	33	169314	-0.0070194	-0.00701952	0.00243004	-0.00225663	-0.0117824	0.00242991	5.9e-06	-0.00700783	-0.00703098	Enrollment rate for Black vs White children of school-age 6-13 as indicator of discrimination in access to public schooling	Steven Ruggles, Sarah Flood, Matthew Sobek, Daniel Backman, Annie Chen, Grace Cooper, Stephanie Richards, Renae Rodgers, and Megan Schouweiler. IPUMS USA: Version 15.0 [Decennial Census from 1850-2010 and 2023 American Community Survey]. Minneapolis, MN: IPUMS, 2024. https://doi.org/10.18128/D010.V15.0	0	observed disparity	actual				1
2023	good	21st century	education	access to public education	Black and White enrollment rate differences among elementary and middle-school-aged children	245681	Black and White children aged 6 to 13	children in U.S. south	-0.0057874	0.0025219	-2.29486	97816	16	97800	-0.00733796	-0.00733809	0.00319744	-0.00107112	-0.0136051	0.00319723	1.02e-05	-0.00731793	-0.007358	Enrollment rate for Black vs White children of school-age 6-13 as indicator of discrimination in access to public schooling	Steven Ruggles, Sarah Flood, Matthew Sobek, Daniel Backman, Annie Chen, Grace Cooper, Stephanie Richards, Renae Rodgers, and Megan Schouweiler. IPUMS USA: Version 15.0 [Decennial Census from 1850-2010 and 2023 American Community Survey]. Minneapolis, MN: IPUMS, 2024. https://doi.org/10.18128/D010.V15.0	0	observed disparity	actual				1
2023	good	21st century	education	access to public education	Black and White enrollment rate differences among elementary and middle-school-aged children	245681	Black and White children aged 6 to 13	children	-0.004731	0.0015988	-2.95901	245681	50	245631	-0.00597031	-0.00597038	0.00201752	-0.00201605	-0.00992471	0.00201744	4.07e-06	-0.00596233	-0.00597828	Enrollment rate for Black vs White children of school-age 6-13 as indicator of discrimination in access to public schooling	Steven Ruggles, Sarah Flood, Matthew Sobek, Daniel Backman, Annie Chen, Grace Cooper, Stephanie Richards, Renae Rodgers, and Megan Schouweiler. IPUMS USA: Version 15.0 [Decennial Census from 1850-2010 and 2023 American Community Survey]. Minneapolis, MN: IPUMS, 2024. https://doi.org/10.18128/D010.V15.0	0	observed disparity	actual
2023	good	21st century	education	access to public education	Black and White enrollment rate differences among elementary and middle-school-aged children	147865	Black and White children aged 6 to 13	children outside U.S. south	-0.00364696	0.00202418	-1.80169	147865	33	147831	-0.00468591	-0.00468594	0.00260059	0.000411213	-0.0097831	0.00260051	6.76e-06	-0.00467265	-0.00469916	Enrollment rate for Black vs White children of school-age 6-13 as indicator of discrimination in access to public schooling	Steven Ruggles, Sarah Flood, Matthew Sobek, Daniel Backman, Annie Chen, Grace Cooper, Stephanie Richards, Renae Rodgers, and Megan Schouweiler. IPUMS USA: Version 15.0 [Decennial Census from 1850-2010 and 2023 American Community Survey]. Minneapolis, MN: IPUMS, 2024. https://doi.org/10.18128/D010.V15.0	0	observed disparity	actual				1
1959	good	Jim Crow	education	public education acces	Equality of public education facilities	4608	White adults	students	-0.35	0.0017	-205.882	100000	1	99998	-0.545615	-0.612116	0.00316233	-0.605918	-0.618314	0.00222089	7.02e-06	-0.545601	-0.545629	Estimated effect using Survey/audit algorithm. Assumes 80-20 Black White split in population of 100,000.	Gallup Organization	0	self-reported discrimination	actual	the u.s. supreme court has ruled that racial segregation in the public schools is illegal. this means that all children no matter what their race, must be allowed to go to the same schools. do you approve or disapprove of this decision?
1931	good	Jim Crow	education	public education spending per student	Within state gap in White vs Black school funding per pupil	15	states	children	-378.6	39.9424	-9.47864	30	15	14	-0.930152	-1.65952	0.19245	-1.28232	-2.03672	0.0250349	0.00457	-0.921194	-0.939111	Mean black-white spending per pupil within states	U.S. Department of Education	0	observed disparity	actual
1935	good	Jim Crow	education	public education spending per student	Within state gap in White vs Black school funding per pupil	17	states	children	-272.294	58.5831	-4.64799	34	15	16	-0.757965	-0.991416	0.179605	-0.63939	-1.34344	0.074068	0.0127	-0.733068	-0.782863	Mean black-white spending per pupil within states	U.S. Department of Education	0	observed disparity	actual
1940	good	Jim Crow	education	public education spending per student	Equality of public education spending	3230	White adults	students	-0.14	0.0496	-2.8243	100	1	98	-0.27435	-0.281562	0.101535	-0.0825545	-0.48057	0.092939	0.00929	-0.256134	-0.292567	Constructed hypothetical database from summary survey data. Database assumes 100 candidates are being rated as acceptable or not. Half are Black and half are White. The percent of Black candidates rated as acceptable equals one minus the discrimination rate. All White candidates are deemed acceptable, given the nature of the question. The model regresses candidate acceptability on Black race.	Citation: Office of Public Opinion Research. OPOR Poll # 1940-301: Youth and Education, Question 17. USOPOR.40-301.Q11. Office of Public Opinion Research. Cornell University, Ithaca, NY: Roper Center for Public Opinion Research, 1940. Web. Jul-10-1940.	0	self-reported discrimination	actual	Do you think that the same amount of tax money should be spent in this state for the education of a Negro child as for a white child?
1943	good	Jim Crow	education	public education spending per student	Within state gap in White vs Black school funding per pupil	16	states	children	-332.5	76.9278	-4.32223	32	15	15	-0.744751	-0.961064	0.185695	-0.597101	-1.32503	0.0799864	0.0141	-0.717037	-0.772465	Mean black-white spending per pupil within states	U.S. Department of Education	0	observed disparity	actual
1944	good	Jim Crow	education	public education spending per student	Equality of public education spending	25210	White adults	students	-0.08	0.001	-80	100000	1	99998	-0.245258	-0.250361	0.00316233	-0.244163	-0.256559	0.00297208	9.4e-06	-0.24524	-0.245276	Estimated effect using Survey/audit algorithm. Assumes 80-20 Black White split in population of 100,000.	National Opinion Research Center (NORC)	0	self-reported discrimination	actual	do you think negroes in this town should have the same chance as white people to get a good education?
1951	good	Jim Crow	education	public education spending per student	Within state gap in White vs Black school funding per pupil	12	states	children	-488.833	192.688	-2.53692	24	15	11	-0.607552	-0.705032	0.218218	-0.277325	-1.13274	0.131548	0.0269	-0.554922	-0.660182	Mean black-white spending per pupil within states	U.S. Department of Education	0	observed disparity	actual
2018	good	21st century	education	public education spending per student	Within state gap in White vs Black school funding per pupil	50	states	children	513.68	53.32	9.63391	24169	51	24118	0.0619153	0.0619946	0.00643276	0.0746028	0.0493864	0.00640784	4.12e-05	0.0619961	0.0618345	Mean black-white spending per pupil within states	Shores, Kenneth A., Hojung Lee, and Elinor Williams. (2022). The Distribution of School Resources in The United States: A Comparative Analysis Across Levels of Governance, Student Sub-groups, And Educational Resources . (EdWorkingPaper: 21 -443). Retrieved from Annenberg Institute at Brown University: https://doi.org/10.26300/58f3-6v39	1	observed disparity	actual
1956	good	Jim Crow	education	school integregation	Acceptability of Black students at White schools	11286	White adults	students	-0.48	0.0017664	-271.739	100000	1	99998	-0.651744	-0.778325	0.00316233	-0.772127	-0.784523	0.00181905	5.75e-06	-0.651733	-0.651755	Constructed hypothetical database from summary survey data. Database assumes 100000 students are being rated as acceptable or not. 20% are Black and 80% are White. The percent of Black studentss rated as acceptable equals one minus the discrimination rate. All White students are deemed acceptable, given the nature of the question. The model regresses candidate acceptability on Black race.	National Opinion Research Center (NORC)	0	self-reported discrimination	actual	do you think white students and negro students should go to the same schools or to separate schools?
1940	good	Jim Crow	education	training	how race affects eligibility for training prorgram	4630	Training courses in defense industry jobs	Southern training courses	-0.9581	0.0029	-330.379	9260	1	9258	-0.96	-1.95	0.0103936	-1.92696	-1.9677	0.000812554	8.44e-06	-0.960094	-0.960128	Data from text, converted into hypothetical database in which the outcome is acceptability of a trainee for a training program. "Out of 4,630 training courses in southern states, only 194 were open to Negro trainees." Assume 4630 courses, each listed twice in a database in there are 9260 training candidates (half Black and half White). Assign value of 1 to "acceptable" for all White candidates, b…	Granger, L. B. (1942). Barriers to Negro war employment. The Annals of the American Academy of Political and Social Science, 223(1), 72-80.	1	observed disparity	actual
1940	good	Jim Crow	education outcome	systemic effect of jim crow	how exposure to Jim Crow affected outcomes	163549	years of education	Black males	-1.59	0.05	-31.8	163549	1	163547	-0.0783912	-0.0785524	0.00247275	-0.0737058	-0.083399	0.00245754	6.08e-06	-0.0784	-0.0784	Results from Table 1	Althoff, L., & Reichardt, H. (2024). Jim Crow and Black economic progress after slavery. The Quarterly Journal of Economics, 139(4), 2279-2330.	0	total effect from slavery	actual			1
2005-2017	good	21st century	financial market	automobile loan	Effect of Black race on probability of loan approval for an automobile, conditional on credit worthiness	214534	car loan applicants	consumers	-1.66	0.332	-5	214534	74	214459	-0.0107962	-0.0107967	0.00215901	-0.006565	-0.0150283	0.00215875	4.66e-06	-0.0107871	-0.0108054	Data from Table 4, column 3, which isolates Black race	Butler, A. W., Mayer, E. J., & Weston, J. P. (2023). Racial disparities in the auto loan market. The Review of Financial Studies, 36(1), 1-41.	1	model-adjusted	actual
2005	good	21st century	financial market	Dept of Agriculture farm ownership (FO) loans to famers	Effect of race on creditworthiness threshold, as implied by default rate on laons	6310	farms	entrepreneurs	1.32	0.2026	6.5153	6310	20	6289	0.081881	0.0820647	0.0125918	0.106745	0.0573847	0.0125054	0.000157429	0.0821895	0.0815724	Table 4, column 3, showing higher default rates for Black borrowers	Dodson, C. B. (2013). Racial/Ethnic Discrimination in USDA’s Direct Farm Lending Programs. In 2013 Annual Meeting, August 4-6, 2013, Washington, DC (No. 150492). Agricultural and Applied Economics Association.	1	success rate	actual
2005	good	21st century	financial market	Dept of Agriculture operating loans (OL) to famers	Effect of race on creditworthiness threshold, as implied by default rate on laons	1748	farms	entrepreneurs	1.9388	0.4921	3.93985	1748	20	1727	0.0944	0.0947	0.0239388	0.141584	0.047744	0.023712	0.000567149	0.0954939	0.0932707	Table 3, column 1, showing higher default rates for Black borrowers	Dodson, C. B. (2013). Racial/Ethnic Discrimination in USDA’s Direct Farm Lending Programs. In 2013 Annual Meeting, August 4-6, 2013, Washington, DC (No. 150492). Agricultural and Applied Economics Association.	1	success rate	actual
2013	good	21st century	financial market	investors	Effect of race on probability of getting a project funded on Kickstarter	7617	start-up businesses	entrepreneurs	-1.54	0.136	-11.3235	7617	30	7586	-0.129	-0.13	0.0114602	-0.107184	-0.152108	0.0112683	0.000129	-0.128672	-0.129178	Column 3 from Table 2	Younkin, Peter, and Venkat Kuppuswamy. "The colorblind crowd? Founder race and performance in crowdfunding." Management Science 64, no. 7 (2018): 3269-3287.	1	model-adjusted	photograph
1993	bad	Post-Civil Rights era	financial market	small business owner loan application	Effect of race on probability of business loan denial	1964	businesses	entrepreneurs	0.234	0.0914062	5.08	1964	20	1943	0.114489	0.114993	0.0225819	0.159253	0.0707322	0.0222746	0.000503	0.115474	0.113503	Table 3, column 1, model 5 of top panel	Blanchflower, David G., Phillip B. Levine, and David J. Zimmerman. "Discrimination in the small-business credit market." Review of Economics and Statistics 85, no. 4 (2003): 930-943.	1	model-adjusted	actual
1998	bad	Post-Civil Rights era	financial market	small business owner loan application	Effect of race on probability of business loan denial	879	businesses	entrepreneurs	0.22	0.0859375	2.56	879	10	868	0.0865659	0.0867831	0.0337869	0.153005	0.0205608	0.0334955	0.00113	0.0887802	0.0843515	Table 2, column 1 new loan denial rate in 1998. Std error imputed from p-value (assume 2.6 t-stat)	Asiedu, Elizabeth, James A. Freeman, and Akwasi Nti-Addae. "Access to credit by small businesses: How relevant are race, ethnicity, and gender?." American Economic Review 102, no. 3 (2012): 532-537.	1	model-adjusted	actual
1998	bad	Post-Civil Rights era	financial market	small business owner loan application	Effect of race on interest rate of business loan	764	businesses	entrepreneurs	0.002	1	0.002	764	10	753	7.29e-05	7.29e-05	0.03625	0.0711228	-0.0709771	0.0362024	0.00131	0.00264001	-0.00249424	Table 2, column 4 interest rates charged on loan in 1998	Asiedu, Elizabeth, James A. Freeman, and Akwasi Nti-Addae. "Access to credit by small businesses: How relevant are race, ethnicity, and gender?." American Economic Review 102, no. 3 (2012): 532-537.	1	model-adjusted	actual
1998	bad	Post-Civil Rights era	financial market	small business owner loan application	Effect of race on probability of business loan denial	927	businesses	entrepreneurs	0.301	0.117578	4.48	927	20	906	0.147216	0.148294	0.0328976	0.212773	0.0838146	0.0321498	0.00106	0.149286	0.145147	Table 3, column 1, model 7 of second panel	Blanchflower, David G., Phillip B. Levine, and David J. Zimmerman. "Discrimination in the small-business credit market." Review of Economics and Statistics 85, no. 4 (2003): 930-943.	1	model-adjusted	actual
2003	bad	21st century	financial market	small business owner loan application	Effect of race on probability of business loan denial	995	businesses	entrepreneurs	0.369	0.144141	2.56	995	10	984	0.0813394	0.0815195	0.03175	0.14375	0.0192894	0.0315082	0.000999	0.0832972	0.0793816	Table 2, column 2 new loan denial rate in 2003. Std error imputed from p-value (assume 2.6 t-stat)	Asiedu, Elizabeth, James A. Freeman, and Akwasi Nti-Addae. "Access to credit by small businesses: How relevant are race, ethnicity, and gender?." American Economic Review 102, no. 3 (2012): 532-537.	1	model-adjusted	actual
2003	bad	21st century	financial market	small business owner loan application	Effect of race on interest rate of business loan	873	businesses	entrepreneurs	1.05	0.47	2.23404	873	10	862	0.0758725	0.0760186	0.0339032	0.142469	0.00956833	0.0336693	0.00114	0.0781059	0.073639	Table 2, column 5 interest rates charged on loan in 2003	Asiedu, Elizabeth, James A. Freeman, and Akwasi Nti-Addae. "Access to credit by small businesses: How relevant are race, ethnicity, and gender?." American Economic Review 102, no. 3 (2012): 532-537.	1	model-adjusted	actual
2003	bad	21st century	financial market	small business owner loan application	Effect of race on interest rate of business loan	1838	businesses	entrepreneurs	0.2861	0.111758	5.01	1838	20	1817	0.11673	0.117264	0.0233444	0.163019	0.0715092	0.0230137	0.000537	0.117782	0.115677	Table 7, col 6	Blanchflower, David G. "Minority self-employment in the United States and the impact of affirmative action programs." Annals of Finance 5, no. 3 (2009): 361-396.	1	model-adjusted	actual
2015	good	21st century	government services	local government response to inquiry	how race affects probability of email reply from local government worker	38168	correpondence with government employee	citizen inquiry	-0.032	0.005	-6.4	38168	3000	35167	-0.0341083	-0.0341215	0.00511879	-0.0240887	-0.0441543	0.0051127	2.62e-05	-0.034057	-0.0341596	Results from last column in Table 3	Giulietti, C., Tonin, M., & Vlassopoulos, M. (2019). Racial discrimination in local public services: A field experiment in the United States. Journal of the European Economic Association, 17(1), 165–204	1	audit	stereotypical names
1948	good	Jim Crow	government services	military service	Acceptability of Black soldiers serving in same unit as White soldiers	3172	White adults	soldiers	-0.6	0.07	-8.5732	100	1	98	-0.654653	-0.783399	0.101535	-0.584391	-0.982406	0.0574308	0.00574	-0.643397	-0.665909	Constructed hypothetical database from summary survey data. Database assumes 100 candidates are being rated as acceptable or not. Half are Black and half are White. The percent of Black candidates rated as acceptable equals one minus the discrimination rate. All White candidates are deemed acceptable, given the nature of the question. The model regresses candidate acceptability on Black race.	Citation: Gallup Organization. Gallup Poll # 419, Question 42. USGALLUP.419.QT06A. Gallup Organization. Cornell University, Ithaca, NY: Roper Center for Public Opinion Research, 1948. Web. May-28-1948.	0	self-reported discrimination	actual	IT HAS BEEN SUGGESTED THAT WHITE AND COLORED MEN SERVE TOGETHER THROUGHOUT THE U.S. (UNITED STATES) ARMED SERVICES--THAT IS, LIVE AND WORK IN THE SAME UNITS. DO YOU THINK THIS IS A GOOD IDEA OR A POOR IDEA?
1912	good	Jim Crow	healthcare	hospital admissions	whether Black patients could be admitted to New York City hospitals	40000	Discriminatory policy by hospital in New York City	patients	-0.34	0.0024967	-136.18	30000	1	29998	-0.618	-0.722	0.00577379	-0.710587	-0.73322	0.0035679	2.06e-05	-0.618047	-0.618127	Assumes 10 out of 29 hospitals in New York Citry forbid Black admission. Database models acceptability of patients as a function of race.	National Medical Association, https://nmanet.org/nma-history/, accessed Jan 20, 2025	0	policy	actual
1930	good	Jim Crow	healthcare	treatment centers	How race affects accessibility by policy	809	Private agencies providing social services and treatment for disabled or vulnerable populations	people in need	-0.66	0.0016748	-394.077	100000	1	99998	-0.779938	-1.04521	0.00316233	-1.03901	-1.05141	0.00123866	3.92e-06	-0.77993	-0.779946	A survey of agencies report recorded the policy of 809 private social agencies, findings that 2/3 did not allow Black people	Irene Graham, "Six Months of the 'South Side Survey,' July 1 to December 20, 1930." p 8 with records of Joint Committee on the Survey of Agencies Serving Negro Community, in Julius Rosenwald Papers, UCL "Report of the Committee on South Siude Survey of Social Agencies, Chicago 1930, p 2'' Referenced in Thomas Lee Philptt. 1991. The Slum and the Ghetto: Immigrants, Blacks, and Reformers in Chicago…	1	policy	actual	Private serivice agencies, such as hospitals, sanitariums, homes for people with disabilities, the Salvation Army, YMCA, hotels, etc, were recorded in a report as accessible to negroes or not. Philpott counted 1/3 (264 of 809) as accessiable (2/3 discriminated), though says this likely exaggerates the number somewhat becuase limited information was available.
1983	good	Post-Civil Rights era	higher education	college admissions	Effect of race on college admission	40825	colllege applicants	colllege applicants to 10 selective colleges in USA				40825			0.469	0.508	0.0049494	0.518121	0.498719	0.00386197	1.91e-05	0.468751	0.468676	Correlation is calculated from Odds ratio, shown in Table 7. Odds ratio is converted to log odds ratio and then Cohen's d and r, using formulas in Cooper et al.	Espenshade, Thomas J., Chang Y. Chung, and Joan L. Walling. "Admission preferences for minority students, athletes, and legacies at elite universities." Social Science Quarterly 85, no. 5 (2004): 1422-1446.	1	model-adjusted	actual
1983	good	Post-Civil Rights era	higher education	college admissions	Effect of race on college admission	1696	colllege applicants	college applicants to top quintile of selective schools	0.103	0.028	3.67857	1696	29	1666	0.0897605	0.0900027	0.0243037	0.137638	0.0423675	0.0240936	0.000585	0.0909071	0.0886138	Data from Table 12-2	Kane, T. J. (1998). Racial and ethnic preferences in college admissions. Ohio St. LJ, 59, 971.	1	model-adjusted	actual
1991	good	Post-Civil Rights era	higher education	college admissions	Effect of race on college admission	4225	law school applicants	colllege applicants to law school in the USA	0.189189	0.0062499	30.2708	4225	1	4223	0.422	0.45	0.0153901	0.480593	0.420264	0.0126431	0.000195	0.422632	0.42187	Data from introduction. Eventual passage rates are 97% for White students and 78% for Black students	Linda F Wightman. LSAC National Longitudinal Bar Passage Study. LSAC Research Report Series, 1998, https://archive.lawschooltransparency.com/reform/projects/investigations/2015/documents/NLBPS.pdf	0	success rate	actual
1993	good	Post-Civil Rights era	higher education	college admissions	Effect of race on college admission	38000	colllege applicants	colllege applicants to 10 selective colleges in USA				38000			0.433668	0.464406	0.00513009	0.474461	0.454351	0.00416518	2.14e-05	0.43371	0.433627	Correlation is calculated from Odds ratio, shown in Table 7. Odds ratio is converted to log odds ratio and then Cohen's d and r, using formulas in Cooper et al.	Espenshade, Thomas J., Chang Y. Chung, and Joan L. Walling. "Admission preferences for minority students, athletes, and legacies at elite universities." Social Science Quarterly 85, no. 5 (2004): 1422-1446.	1	model-adjusted	actual
1997	good	Post-Civil Rights era	higher education	college admissions	Effect of race on college admission	45549	colllege applicants	colllege applicants to 10 selective colleges in USA				45549			0.40368	0.428038	0.0046857	0.437222	0.418854	0.00392205	1.84e-05	0.403716	0.403644	Correlation is calculated from Odds ratio, shown in Table 7. Odds ratio is converted to log odds ratio and then Cohen's d and r, using formulas in Cooper et al.	Espenshade, Thomas J., Chang Y. Chung, and Joan L. Walling. "Admission preferences for minority students, athletes, and legacies at elite universities." Social Science Quarterly 85, no. 5 (2004): 1422-1446.	1	model-adjusted	actual
2014	good	21st century	higher education	college admissions	Effect of race on college admission	142700	colllege applicants	colllege applicants to Harvard	2.417	0.05	48.34	142700	28	142671	0.126944	0.127632	0.00264724	0.132821	0.122444	0.00260456	6.89e-06	0.126957	0.12693	Column 2 from Table A2	Arcidiacono, P., Kinsler, J., & Ransom, T. (2023). What the Students for Fair Admissions Cases Reveal About Racial Preferences. Journal of Political Economy Microeconomics, 1(4), 615-668.	1	model-adjusted	actual		1
2014	good	21st century	higher education	college admissions	Effect of race on college admission	142700	colllege applicants	colllege applicants to Harvard	3.772	0.105	35.9238	128422	28	128393	0.0997562	0.100089	0.00279052	0.105559	0.0946197	0.00276273	7.71e-06	0.0997713	0.0997411	Column 3 from Table 7	Arcidiacono, P., Kinsler, J., & Ransom, T. (2023). What the Students for Fair Admissions Cases Reveal About Racial Preferences. Journal of Political Economy Microeconomics, 1(4), 615-668.	1	model-adjusted	actual
2016	good	21st century	higher education	college admissions	Effect of race on college admission	142700	colllege applicants	colllege applicants to UNC	6.162	0.125	49.296	105116	28	105087	0.150339	0.151488	0.00308441	0.157533	0.145442	0.00301467	9.3e-06	0.150358	0.150321	Column 6 from Table 7	Arcidiacono, P., Kinsler, J., & Ransom, T. (2023). What the Students for Fair Admissions Cases Reveal About Racial Preferences. Journal of Political Economy Microeconomics, 1(4), 615-668.	1	model-adjusted	actual
2021	good	21st century	higher education	college admissions	Effect of race on college admission	23807	law school applicants	colllege applicants to law school in the USA	0.150057	0.0024536	61.158	23807	1	23805	0.368493	0.386679	0.00648149	0.399382	0.373975	0.00560115	3.63e-05	0.368564	0.368422	Data from American Bar Association, using 2-year ultimate passage rate for students completing law school in 2021	American Bar Association, 2023-2024 SUMMARY BAR PASS DATA: RACE, ETHNICITY, AND GENDER, available https://www.americanbar.org/content/dam/aba/administrative/legal_education_and_admissions_to_the_bar/statistics/2024/summary-race-ethnicity-gender.pdf	0	success rate	actual
2022	good	21st century	higher education	faculty hiring based on affirmative action	How White race affects whether well-qualified candidates are deemed acceptable for hiring	18	Applicants to university professor positions at the University of Colorado, Boulder	workers	0.90625	0.149966	6.04306	36	1	34	0.719623	0.906863	0.174078	1.24805	0.56567	0.081497	0.0136	0.746245	0.693001	Of 18 recent non-spousal hires at the Univ of Colorado College of Arts and Sciences, the dean estimated that 90% (16 of 18) are from the discriminatory program aimed at not hiring White people, https://drive.google.com/file/d/1PW6i4ht2WpqKDLXcifYPCQHvl0vFe0cf/view. "Through the program, the university brazenly prompted departments to select faculty based on race," according to records obtained fr…	John Sailer and Louis Galarowicz, "How DEI Conquered the University of Colorado Trump’s order against the practice is a crucial step in restoring the purpose of higher education" Jan. 26, 2025, https://www.wsj.com/opinion/how-dei-conquered-the-university-of-colorado-boulder-discrimination-hiring-professors-0c306a9e	0	policy	actual
2022	good	21st century	higher education	faculty hiring based on affirmative action	How White race affects whether well-qualified candidates are deemed acceptable for hiring	27	Applicants to university professor positions at the University of Illinois	workers	0.5	0.208013	2.4037	54	1	52	0.316228	0.32745	0.140028	0.601905	0.0529952	0.123625	0.0168	0.349201	0.283254	In September 2022, the Department of Industrial Engineering at the University of Illinois Chicago (UIC) made a bold promise to the school’s Office of Diversity, Equity, and Engagement: From then on, the department said, 50 percent of all faculty hires would be either women or minorities. The relevant program to which the dept applied lists 27 scholars hired by this initiative. The number of appli…	Aaron Sibarium, "Race-Based Hiring Programs Persist at Public Universities. Here's How." The Washington Free Beacon, November 26, 2024, available https://freebeacon.com/campus/inside-a-public-universitys-race-based-hiring-program/. Further evidence is here: https://diversity.uic.edu/initiatives/bridge-to-faculty/. Data on the number of applicants hired under this process were available here: http…	0	policy	actual
1951	good	Jim Crow	higher education	medical school admissions	whether Black students could be admitted to medical school	30000	Discriminatory policy by medical schools in U.S. South	medical students	-0.92	0.0016511	-557.204	30000	1	29998	-0.954931	-1.88496	0.00577379	-1.87364	-1.89628	0.000508691	2.94e-06	-0.954925	-0.954937	Assumes 24 out of 26 schools forbid Black admission, based on number of medical schools in South, following Civil Rights Act. Analysis considers potential Black candidates and predict acceptability.	National Medical Association, https://nmanet.org/nma-history/, accessed Jan 20, 2025	0	policy	actual
1952	good	Jim Crow	higher education	medical school admissions	whether Black students could be admitted to medical school	30000	Discriminatory policy by medical schools in U.S. South	medical students	-0.92	0.0016511	-557.204	30000	1	29998	-0.954931	-1.88496	0.00577379	-1.87364	-1.89628	0.000508691	2.94e-06	-0.954925	-0.954937	Assumes 24 out of 26 schools forbid Black admission, based on number of medical schools in South, following Civil Rights Act. Analysis considers potential Black candidates and predict acceptability.	National Medical Association, https://nmanet.org/nma-history/, accessed Jan 20, 2025	0	policy	actual
1953	good	Jim Crow	higher education	medical school admissions	whether Black students could be admitted to medical school	30000	Discriminatory policy by medical schools in U.S. South	medical students	-0.92	0.0016511	-557.204	30000	1	29998	-0.954931	-1.88496	0.00577379	-1.87364	-1.89628	0.000508691	2.94e-06	-0.954925	-0.954937	Assumes 24 out of 26 schools forbid Black admission, based on number of medical schools in South, following Civil Rights Act. Analysis considers potential Black candidates and predict acceptability.	National Medical Association, https://nmanet.org/nma-history/, accessed Jan 20, 2025	0	policy	actual
1954	good	Jim Crow	higher education	medical school admissions	whether Black students could be admitted to medical school	30000	Discriminatory policy by medical schools in U.S. South	medical students	-0.92	0.0016511	-557.204	30000	1	29998	-0.954931	-1.88496	0.00577379	-1.87364	-1.89628	0.000508691	2.94e-06	-0.954925	-0.954937	Assumes 24 out of 26 schools forbid Black admission, based on number of medical schools in South, following Civil Rights Act. Analysis considers potential Black candidates and predict acceptability.	National Medical Association, https://nmanet.org/nma-history/, accessed Jan 20, 2025	0	policy	actual
1955	good	Jim Crow	higher education	medical school admissions	whether Black students could be admitted to medical school	30000	Discriminatory policy by medical schools in U.S. South	medical students	-0.92	0.0016511	-557.204	30000	1	29998	-0.954931	-1.88496	0.00577379	-1.87364	-1.89628	0.000508691	2.94e-06	-0.954925	-0.954937	Assumes 24 out of 26 schools forbid Black admission, based on number of medical schools in South, following Civil Rights Act. Analysis considers potential Black candidates and predict acceptability.	National Medical Association, https://nmanet.org/nma-history/, accessed Jan 20, 2025	0	policy	actual
1956	good	Jim Crow	higher education	medical school admissions	whether Black students could be admitted to medical school	30000	Discriminatory policy by medical schools in U.S. South	medical students	-0.92	0.0016511	-557.204	30000	1	29998	-0.954931	-1.88496	0.00577379	-1.87364	-1.89628	0.000508691	2.94e-06	-0.954925	-0.954937	Assumes 24 out of 26 schools forbid Black admission, based on number of medical schools in South, following Civil Rights Act. Analysis considers potential Black candidates and predict acceptability.	National Medical Association, https://nmanet.org/nma-history/, accessed Jan 20, 2025	0	policy	actual
1957	good	Jim Crow	higher education	medical school admissions	whether Black students could be admitted to medical school	30000	Discriminatory policy by medical schools in U.S. South	medical students	-0.92	0.0016511	-557.204	30000	1	29998	-0.954931	-1.88496	0.00577379	-1.87364	-1.89628	0.000508691	2.94e-06	-0.954925	-0.954937	Assumes 24 out of 26 schools forbid Black admission, based on number of medical schools in South, following Civil Rights Act. Analysis considers potential Black candidates and predict acceptability.	National Medical Association, https://nmanet.org/nma-history/, accessed Jan 20, 2025	0	policy	actual
1958	good	Jim Crow	higher education	medical school admissions	whether Black students could be admitted to medical school	30000	Discriminatory policy by medical schools in U.S. South	medical students	-0.92	0.0016511	-557.204	30000	1	29998	-0.954931	-1.88496	0.00577379	-1.87364	-1.89628	0.000508691	2.94e-06	-0.954925	-0.954937	Assumes 24 out of 26 schools forbid Black admission, based on number of medical schools in South, following Civil Rights Act. Analysis considers potential Black candidates and predict acceptability.	National Medical Association, https://nmanet.org/nma-history/, accessed Jan 20, 2025	0	policy	actual
1959	good	Jim Crow	higher education	medical school admissions	whether Black students could be admitted to medical school	30000	Discriminatory policy by medical schools in U.S. South	medical students	-0.92	0.0016511	-557.204	30000	1	29998	-0.954931	-1.88496	0.00577379	-1.87364	-1.89628	0.000508691	2.94e-06	-0.954925	-0.954937	Assumes 24 out of 26 schools forbid Black admission, based on number of medical schools in South, following Civil Rights Act. Analysis considers potential Black candidates and predict acceptability.	National Medical Association, https://nmanet.org/nma-history/, accessed Jan 20, 2025	0	policy	actual
1960	good	Jim Crow	higher education	medical school admissions	whether Black students could be admitted to medical school	30000	Discriminatory policy by medical schools in U.S. South	medical students	-0.46	0.0030333	-151.65	30000	1	29998	-0.658752	-0.790606	0.00577379	-0.779289	-0.801923	0.00326812	1.89e-05	-0.658715	-0.658789	Assumes 24 out of 26 schools forbid Black admission, based on number of medical schools in South, following Civil Rights Act. Analysis considers potential Black candidates and predict acceptability.	National Medical Association, https://nmanet.org/nma-history/, accessed Jan 20, 2025	0	policy	actual
1965	good	Post-Civil Rights era	higher education	medical school admissions	whether Black students could be admitted to medical school	30000	Discriminatory policy by medical schools in U.S. South	medical students	0	0	0	30000	1	29998	0	0	0.00577379	0.0113166	-0.0113166	0.0057736	3.33e-05	6.53e-05	-6.53e-05	Assumes 0 out of 26 schools forbid Black admission, based on number of medical schools in South, following Civil Rights Act. Analysis considers potential Black candidates and predict acceptability.	National Medical Association, https://nmanet.org/nma-history/, accessed Jan 20, 2025	0	policy	actual
1939	bad	Jim Crow	higher education	racial integration at colleges	Acceptability of Black students at large Southern land-grant college	838	White students	college students at land grant college	0.47	0.0016637	282.503	100000	1	99998	0.666225	0.803924	0.00316233	0.810123	0.797726	0.00175869	5.56e-06	0.666236	0.666214	Used survey/policy algorithm to create pseudo-database and estimate r. Database assumes 80% White population share. The survey shows that 47% of surveyed White college students at a large land-grant school in the South would reject the attendance of even a few Black students. I assume 90% White population in hypothetical database, given the survey pertains to only a few students	Wilkerson, Doxey. "The Negro in American Education," p183-184. Quoted in p1421 of Myrdal, G. (1944). An American Dilemma. New York: Harper and Brothers.	1	self-reported discrimination	actual	If a few Negroes are admitted by order of the court or legislature: How should the other students treat them: a) go out of the way to be friendly to them (0.4%); b) make no advanced but accept their presence in good grace (46%); c) can't say; not sure (7%); d) Deliberatrely ignore them so they'll feel they are not wanted (27%); e) Organize to make life miserable for them; try to force them to lea…
1990	good	Post-Civil Rights era	housing market	access to mortage loan	Effect of race on probability of getting a response from an email about a mortgage loan application	2925	mortage applicants	consumers	-0.007	-0.00209581	3.34	2925	1	2923	0.0616602	0.0617385	0.0184995	0.0979975	0.0254795	0.0184229	0.000341	0.0623278	0.0609925	Data from Table 2	Munnell, A. H., Tootell, G. M., Browne, L. E., & McEneaney, J. (1996). Mortgage lending in Boston: Interpreting HMDA data. The American Economic Review, 25-53.	1	model-adjusted	actual
1999	good	Post-Civil Rights era	housing market	access to mortage loan	Effect of race on probability of getting a response from an email about a mortgage loan application	567	mortage applicants	consumers	0.0257	0.28	0.0917857	567	1	565	0.00386142	0.00386144	0.0421076	0.0863923	-0.0786694	0.0420325	0.00177	0.00732122	0.000401634	Data from Table 2 predicted acceptance rate at a single bank (using a random sample of loan applications) and included many borrower financial charateristics	Agarwal, S., Li, S., & Mielnicki, L. (2003). Mortgages, minorities and discrimination: A bank-specific approach. Housing Studies, 18(3), 295-303.	1	model-adjusted	actual
2016	good	21st century	housing market	access to mortage loan	Effect of race on probability of getting a response from an email about a mortgage loan application	3982	mortage applicants	consumers	-0.0228558	0.0149158	-1.53232	3982	1	3980	-0.0242818	-0.0242865	0.0158531	0.00678545	-0.0553585	0.0158397	0.000251	-0.0237898	-0.0247738	Recreated database with identical summary statistics to calculate effect size by regressing Black racial status on response from mortgage loan officer using data from Table 5, final columns. These are the best estimates because they adjust for mortgage loan officer fixed effects in response probability by comparing within the same officer.	Hanson, Andrew, Zackary Hawley, Hal Martin, and Bo Liu. "Discrimination in mortgage lending: Evidence from a correspondence experiment." Journal of Urban Economics 92 (2016): 48-65.	1	audit	stereotypical names
1987-1989	good	Post-Civil Rights era	housing market	access to mortage loan	Effect of race on probability of getting a response from an email about a mortgage loan application	73000	mortage applicants	consumers	0.483379	0.316959	1.52505	73000	1	72998	0.00564446	0.00564452	0.00370124	0.012899	-0.00160992	0.00370107	1.37e-05	0.0056713	0.00561761	Data from Table 3 predicting default rate by race. Higher default rate for Black borrowers suggests lower threshold for loan approval. Data are averaged across the three years and st errors are estimated from the p-value	James A. Berkovec, Glenn B. Canner, Stuart A. Gabriel, Timothy H. Hannan. 1996. "Mortgage Discrimination and FHA Loan Performance," Cityscape: A Journal of Policy Development and Research 2 1. See also: James A. Berkovec, Glenn B. Canner, Stuart A. Gabriel, Timothy H. Hannan; Discrimination, Competition, and Loan Performance in FHA Mortgage Lending. The Review of Economics and Statistics 1998; 80…	1	model-adjusted	actual
2000-2007	good	21st century	housing market	appraised value of home	Appraiser evalaution of home value	195158	Properties	home owners	-0.009	0.002	-4.5	195158	25	195132	-0.0101865	-0.0101869	0.00226365	-0.00575011	-0.0146236	0.00226341	5.12e-06	-0.0101765	-0.0101966	Data from Table 3, column 1	Ambrose, B. W., Conklin, J., Coulson, N. E., Diop, M., & Lopez, L. A. (2022). Do Appraiser and Borrower Race Affect Valuation?. SSRN.	1	model-adjusted	actual
2013-2021	good	21st century	housing market	appraised value of home	Effect of borrower race on appraiser evalaution of home value	345920	Properties	Black borrowers	-0.001196	0.000581844	-2.05553	345920	30	345889	-0.00349505	-0.00349506	0.00170025	-0.000162565	-0.00682756	0.00170023	2.89e-06	-0.00348938	-0.00350072	Estimated from primary models with property and neighborhood characteristics	Rothwell J. 2024. Aggregate Discrimination in the Absence of Individual Discrimination: An Analysis of Home Appraisal Data (SSRN)	1	model-adjusted	actual
2013-2021	good	21st century	housing market	appraised value of home	Effect of Black neighborhood share of population on appraiser evalaution of home value	345920	Properties	black composition of neighborhood	-0.32	0.0105855	-30.23	345920	30	345889	-0.051333	-0.0513782	0.00170025	-0.0480457	-0.0547107	0.00169577	2.88e-06	-0.0513274	-0.0513387	Estimated from primary models with property and neighborhood characteristics	Rothwell J. 2024. Aggregate Discrimination in the Absence of Individual Discrimination: An Analysis of Home Appraisal Data (SSRN)	1	model-adjusted	Black share of population
2004	bad	21st century	housing market	high-interest loan	Effect of race on probabilty of getting high interest loan	44279	mortgage loan applicants	mortgage loan applicants	0.045	0.008	5.625	44279	17	44261	0.0267274	0.0267338	0.00475243	0.0360485	0.017419	0.00474893	2.26e-05	0.0267716	0.0266832	Table 3, column 7	Bayer, Patrick, Fernando Ferreira, and Stephen L. Ross. "What drives racial and ethnic differences in high-cost mortgages? The role of high-risk lenders." The Review of Financial Studies 31, no. 1 (2018): 175-205.	1	model-adjusted	actual
1938	good	Jim Crow	housing market	home or rental purchase	Acceptability of Black people living near White people	5146	White adults	consumers	-0.82	0.0549	-14.9406	100	1	98	-0.833615	-1.19987	0.101535	-1.00086	-1.39888	0.0306622	0.00307	-0.827606	-0.839625	Constructed hypothetical database from summary survey data. Database assumes 100 candidates are being rated as acceptable or not. Half are Black and half are White. The percent of Black candidates rated as acceptable equals one minus the discrimination rate. All White candidates are deemed acceptable, given the nature of the question. The model regresses candidate acceptability on Black race.	Fortune Magazine. Roper Fortune # 9: Roosevelt Balance Sheet/Tariffs/Negroes/Sex/General, Question 35. USROPER.39-009.QC04. The Roper Organization. Cornell University, Ithaca, NY: Roper Center for Public Opinion Research, 1939. Web. Sep-01-1939.	0	self-reported discrimination	actual	Do you think...A. There should be laws compelling Negroes to live in certain districts, or B. There should be no laws, but there should be an unwritten understanding, baked up by social pressure, to keep Negroes out of the neighborhoods where white people live, or C. Negroes should be allowed to live wherever they want to live, and there should be no laws nor social pressure to keep them from it?
1958	good	Jim Crow	housing market	home or rental purchase	Acceptability of Black people living near White people	4995	White adults	consumers	-0.21	0.0014	-150	100000	1	99998	-0.428575	-0.45815	0.00316233	-0.451951	-0.464348	0.00258145	8.16e-06	-0.428559	-0.428591	Constructed hypothetical database from summary survey data. Database assumes 100000 candidates are being rated as acceptable or not. 80% White, 20% Black. The percent of Black candidates rated as acceptable equals one minus the discrimination rate, defined as percent say they would move. All White candidates are deemed acceptable, given the nature of the question. The model regresses candidate ac…	Gallup Organization	0	self-reported discrimination	actual	if colored people came to live next door, would you move?
1963	good	Jim Crow	housing market	home or rental purchase	Acceptability of Black people living near White people	7785	White adults	consumers	-0.28	0.002	-140	100000	1	99998	-0.404824	-0.429405	0.00316233	-0.423207	-0.435603	0.00264405	8.36e-06	-0.404807	-0.40484	Constructed hypothetical database from summary survey data. Database assumes 100000 candidates are being rated as acceptable or not. Half are Black and half are White. The percent of Black candidates rated as acceptable equals one minus the discrimination rate, defined as percent who agree that White people have the right to keep Black people out of their neighborhoods. All White candidates are d…	General Social Survey, National Opionion Research Center	0	self-reported discrimination	actual	Here are some opinions other people have expressed in connection with (negro/black)-white relations. Which statement on the card comes closest to how you, yourself, feel?)... White people have a right to keep (negroes/blacks) out of their neighborhoods if they want to, and (negroes/blacks) should respect that right.
1968	good	Post-Civil Rights era	housing market	home or rental purchase	Acceptability of Black people living near White people	7410	White adults	consumers	-0.28	0.002	-140	100000	1	99998	-0.404824	-0.429405	0.00316233	-0.423207	-0.435603	0.00264405	8.36e-06	-0.404807	-0.40484	Constructed hypothetical database from summary survey data. Database assumes 100000 candidates are being rated as acceptable or not. Half are Black and half are White. The percent of Black candidates rated as acceptable equals one minus the discrimination rate, defined as percent who agree that White people have the right to keep Black people out of their neighborhoods. All White candidates are d…	General Social Survey, National Opionion Research Center	0	self-reported discrimination	actual	Here are some opinions other people have expressed in connection with (negro/black)-white relations. Which statement on the card comes closest to how you, yourself, feel?)... White people have a right to keep (negroes/blacks) out of their neighborhoods if they want to, and (negroes/blacks) should respect that right.
1970	good	Post-Civil Rights era	housing market	home or rental purchase	Acceptability of Black people living near White people	8940	White adults	consumers	-0.22	0.0019	-115.789	100000	1	99998	-0.343837	-0.358437	0.00316233	-0.352239	-0.364636	0.00278844	8.82e-06	-0.34382	-0.343854	Constructed hypothetical database from summary survey data. Database assumes 100000 candidates are being rated as acceptable or not. Half are Black and half are White. The percent of Black candidates rated as acceptable equals one minus the discrimination rate, defined as percent who agree that White people have the right to keep Black people out of their neighborhoods. All White candidates are d…	General Social Survey, National Opionion Research Center	0	self-reported discrimination	actual	Here are some opinions other people have expressed in connection with (negro/black)-white relations. Which statement on the card comes closest to how you, yourself, feel?)... White people have a right to keep (negroes/blacks) out of their neighborhoods if they want to, and (negroes/blacks) should respect that right.
1972	good	Post-Civil Rights era	housing market	home or rental purchase	Acceptability of Black people living near White people	8065	White adults	consumers	-0.19	0.0018	-105.556	100000	1	99998	-0.316626	-0.327892	0.00316233	-0.321694	-0.33409	0.00284527	9e-06	-0.316608	-0.316643	Constructed hypothetical database from summary survey data. Database assumes 100000 candidates are being rated as acceptable or not. Half are Black and half are White. The percent of Black candidates rated as acceptable equals one minus the discrimination rate, defined as percent who agree that White people have the right to keep Black people out of their neighborhoods. All White candidates are d…	General Social Survey, National Opionion Research Center	0	self-reported discrimination	actual	Here are some opinions other people have expressed in connection with (negro/black)-white relations. Which statement on the card comes closest to how you, yourself, feel?)... White people have a right to keep (negroes/blacks) out of their neighborhoods if they want to, and (negroes/blacks) should respect that right.
1976	good	Post-Civil Rights era	housing market	home or rental purchase	Acceptability of Black people living near White people	7495	White adults	consumers	-0.19	0.0018	-105.556	100000	1	99998	-0.316626	-0.327892	0.00316233	-0.321694	-0.33409	0.00284527	9e-06	-0.316608	-0.316643	Constructed hypothetical database from summary survey data. Database assumes 100000 candidates are being rated as acceptable or not. Half are Black and half are White. The percent of Black candidates rated as acceptable equals one minus the discrimination rate, defined as percent who agree that White people have the right to keep Black people out of their neighborhoods. All White candidates are d…	General Social Survey, National Opionion Research Center	0	self-reported discrimination	actual	Here are some opinions other people have expressed in connection with (negro/black)-white relations. Which statement on the card comes closest to how you, yourself, feel?)... White people have a right to keep (negroes/blacks) out of their neighborhoods if they want to, and (negroes/blacks) should respect that right.
1977	good	Post-Civil Rights era	housing market	home or rental purchase	Acceptability of Black people living near White people	7650	White adults	consumers	-0.21	0.0018	-116.667	100000	1	99998	-0.346131	-0.361041	0.00316233	-0.354843	-0.367239	0.00278343	8.8e-06	-0.346114	-0.346148	Constructed hypothetical database from summary survey data. Database assumes 100000 candidates are being rated as acceptable or not. Half are Black and half are White. The percent of Black candidates rated as acceptable equals one minus the discrimination rate, defined as percent who agree that White people have the right to keep Black people out of their neighborhoods. All White candidates are d…	General Social Survey, National Opionion Research Center	0	self-reported discrimination	actual	Here are some opinions other people have expressed in connection with (negro/black)-white relations. Which statement on the card comes closest to how you, yourself, feel?)... White people have a right to keep (negroes/blacks) out of their neighborhoods if they want to, and (negroes/blacks) should respect that right.
1980	good	Post-Civil Rights era	housing market	home or rental purchase	Acceptability of Black people living near White people	7340	White adults	consumers	-0.15	0.0016	-93.75	100000	1	99998	-0.284238	-0.292287	0.00316233	-0.286089	-0.298485	0.00290681	9.19e-06	-0.28422	-0.284256	Constructed hypothetical database from summary survey data. Database assumes 100000 candidates are being rated as acceptable or not. Half are Black and half are White. The percent of Black candidates rated as acceptable equals one minus the discrimination rate, defined as percent who agree that White people have the right to keep Black people out of their neighborhoods. All White candidates are d…	General Social Survey, National Opionion Research Center	0	self-reported discrimination	actual	Here are some opinions other people have expressed in connection with (negro/black)-white relations. Which statement on the card comes closest to how you, yourself, feel?)... White people have a right to keep (negroes/blacks) out of their neighborhoods if they want to, and (negroes/blacks) should respect that right.
1982	good	Post-Civil Rights era	housing market	home or rental purchase	Acceptability of Black people living near White people	7530	White adults	consumers	-0.13	0.0015	-86.6667	100000	1	99998	-0.26432	-0.270747	0.00316233	-0.264549	-0.276945	0.00294136	9.3e-06	-0.264301	-0.264338	Constructed hypothetical database from summary survey data. Database assumes 100000 candidates are being rated as acceptable or not. Half are Black and half are White. The percent of Black candidates rated as acceptable equals one minus the discrimination rate, defined as percent who agree that White people have the right to keep Black people out of their neighborhoods. All White candidates are d…	General Social Survey, National Opionion Research Center	0	self-reported discrimination	actual	Here are some opinions other people have expressed in connection with (negro/black)-white relations. Which statement on the card comes closest to how you, yourself, feel?)... White people have a right to keep (negroes/blacks) out of their neighborhoods if they want to, and (negroes/blacks) should respect that right.
1984	good	Post-Civil Rights era	housing market	home or rental purchase	Acceptability of Black people living near White people	7365	White adults	consumers	-0.12	0.0015	-80	100000	1	99998	-0.245258	-0.250361	0.00316233	-0.244163	-0.256559	0.00297208	9.4e-06	-0.24524	-0.245276	Constructed hypothetical database from summary survey data. Database assumes 100000 candidates are being rated as acceptable or not. Half are Black and half are White. The percent of Black candidates rated as acceptable equals one minus the discrimination rate, defined as percent who agree that White people have the right to keep Black people out of their neighborhoods. All White candidates are d…	General Social Survey, National Opionion Research Center	0	self-reported discrimination	actual	Here are some opinions other people have expressed in connection with (negro/black)-white relations. Which statement on the card comes closest to how you, yourself, feel?)... White people have a right to keep (negroes/blacks) out of their neighborhoods if they want to, and (negroes/blacks) should respect that right.
1985	good	Post-Civil Rights era	housing market	home or rental purchase	Acceptability of Black people living near White people	7670	White adults	consumers	-0.13	0.0015	-86.6667	100000	1	99998	-0.26432	-0.270747	0.00316233	-0.264549	-0.276945	0.00294136	9.3e-06	-0.264301	-0.264338	Constructed hypothetical database from summary survey data. Database assumes 100000 candidates are being rated as acceptable or not. Half are Black and half are White. The percent of Black candidates rated as acceptable equals one minus the discrimination rate, defined as percent who agree that White people have the right to keep Black people out of their neighborhoods. All White candidates are d…	General Social Survey, National Opionion Research Center	0	self-reported discrimination	actual	Here are some opinions other people have expressed in connection with (negro/black)-white relations. Which statement on the card comes closest to how you, yourself, feel?)... White people have a right to keep (negroes/blacks) out of their neighborhoods if they want to, and (negroes/blacks) should respect that right.
1987	good	Post-Civil Rights era	housing market	home or rental purchase	Acceptability of Black people living near White people	7330	White adults	consumers	-0.12	0.0015	-80	100000	1	99998	-0.245258	-0.250361	0.00316233	-0.244163	-0.256559	0.00297208	9.4e-06	-0.24524	-0.245276	Constructed hypothetical database from summary survey data. Database assumes 100000 candidates are being rated as acceptable or not. Half are Black and half are White. The percent of Black candidates rated as acceptable equals one minus the discrimination rate, defined as percent who agree that White people have the right to keep Black people out of their neighborhoods. All White candidates are d…	General Social Survey, National Opionion Research Center	0	self-reported discrimination	actual	Here are some opinions other people have expressed in connection with (negro/black)-white relations. Which statement on the card comes closest to how you, yourself, feel?)... White people have a right to keep (negroes/blacks) out of their neighborhoods if they want to, and (negroes/blacks) should respect that right.
1988	good	Post-Civil Rights era	housing market	home or rental purchase	Acceptability of Black people living near White people	7405	White adults	consumers	-0.11	0.0014	-78.5714	100000	1	99998	-0.241135	-0.245979	0.00316233	-0.239781	-0.252177	0.00297842	9.42e-06	-0.241117	-0.241154	Constructed hypothetical database from summary survey data. Database assumes 100000 candidates are being rated as acceptable or not. Half are Black and half are White. The percent of Black candidates rated as acceptable equals one minus the discrimination rate, defined as percent who agree that White people have the right to keep Black people out of their neighborhoods. All White candidates are d…	General Social Survey, National Opionion Research Center	0	self-reported discrimination	actual	Here are some opinions other people have expressed in connection with (negro/black)-white relations. Which statement on the card comes closest to how you, yourself, feel?)... White people have a right to keep (negroes/blacks) out of their neighborhoods if they want to, and (negroes/blacks) should respect that right.
1989	good	Post-Civil Rights era	housing market	home or rental purchase	Acceptability of Black people living near White people	7685	White adults	consumers	-0.11	0.0014	-78.5714	100000	1	99998	-0.241135	-0.245979	0.00316233	-0.239781	-0.252177	0.00297842	9.42e-06	-0.241117	-0.241154	Constructed hypothetical database from summary survey data. Database assumes 100000 candidates are being rated as acceptable or not. Half are Black and half are White. The percent of Black candidates rated as acceptable equals one minus the discrimination rate, defined as percent who agree that White people have the right to keep Black people out of their neighborhoods. All White candidates are d…	General Social Survey, National Opionion Research Center	0	self-reported discrimination	actual	Here are some opinions other people have expressed in connection with (negro/black)-white relations. Which statement on the card comes closest to how you, yourself, feel?)... White people have a right to keep (negroes/blacks) out of their neighborhoods if they want to, and (negroes/blacks) should respect that right.
1990	good	Post-Civil Rights era	housing market	home or rental purchase	Acceptability of Black people living near White people	6860	White adults	consumers	-0.11	0.0014	-78.5714	100000	1	99998	-0.241135	-0.245979	0.00316233	-0.239781	-0.252177	0.00297842	9.42e-06	-0.241117	-0.241154	Constructed hypothetical database from summary survey data. Database assumes 100000 candidates are being rated as acceptable or not. Half are Black and half are White. The percent of Black candidates rated as acceptable equals one minus the discrimination rate, defined as percent who agree that White people have the right to keep Black people out of their neighborhoods. All White candidates are d…	General Social Survey, National Opionion Research Center	0	self-reported discrimination	actual	Here are some opinions other people have expressed in connection with (negro/black)-white relations. Which statement on the card comes closest to how you, yourself, feel?)... White people have a right to keep (negroes/blacks) out of their neighborhoods if they want to, and (negroes/blacks) should respect that right.
1991	good	Post-Civil Rights era	housing market	home or rental purchase	Acceptability of Black people living near White people	7585	White adults	consumers	-0.09	0.0013	-69.2308	100000	1	99998	-0.213864	-0.217217	0.00316233	-0.211019	-0.223415	0.00301766	9.54e-06	-0.213845	-0.213883	Constructed hypothetical database from summary survey data. Database assumes 100000 candidates are being rated as acceptable or not. Half are Black and half are White. The percent of Black candidates rated as acceptable equals one minus the discrimination rate, defined as percent who agree that White people have the right to keep Black people out of their neighborhoods. All White candidates are d…	General Social Survey, National Opionion Research Center	0	self-reported discrimination	actual	Here are some opinions other people have expressed in connection with (negro/black)-white relations. Which statement on the card comes closest to how you, yourself, feel?)... White people have a right to keep (negroes/blacks) out of their neighborhoods if they want to, and (negroes/blacks) should respect that right.
1993	good	Post-Civil Rights era	housing market	home or rental purchase	Acceptability of Black people living near White people	8030	White adults	consumers	-0.07	0.0011	-63.6364	100000	1	99998	-0.197283	-0.199904	0.00316233	-0.193706	-0.206102	0.00303922	9.61e-06	-0.197264	-0.197302	Constructed hypothetical database from summary survey data. Database assumes 100000 candidates are being rated as acceptable or not. Half are Black and half are White. The percent of Black candidates rated as acceptable equals one minus the discrimination rate, defined as percent who agree that White people have the right to keep Black people out of their neighborhoods. All White candidates are d…	General Social Survey, National Opionion Research Center	0	self-reported discrimination	actual	Here are some opinions other people have expressed in connection with (negro/black)-white relations. Which statement on the card comes closest to how you, yourself, feel?)... White people have a right to keep (negroes/blacks) out of their neighborhoods if they want to, and (negroes/blacks) should respect that right.
1994	good	Post-Civil Rights era	housing market	home or rental purchase	Acceptability of Black people living near White people	14960	White adults	consumers	-0.08	0.0012	-66.6667	100000	1	99998	-0.206286	-0.209289	0.00316233	-0.203091	-0.215488	0.00302773	9.57e-06	-0.206267	-0.206305	Constructed hypothetical database from summary survey data. Database assumes 100000 candidates are being rated as acceptable or not. Half are Black and half are White. The percent of Black candidates rated as acceptable equals one minus the discrimination rate, defined as percent who agree that White people have the right to keep Black people out of their neighborhoods. All White candidates are d…	General Social Survey, National Opionion Research Center	0	self-reported discrimination	actual	Here are some opinions other people have expressed in connection with (negro/black)-white relations. Which statement on the card comes closest to how you, yourself, feel?)... White people have a right to keep (negroes/blacks) out of their neighborhoods if they want to, and (negroes/blacks) should respect that right.
1996	good	Post-Civil Rights era	housing market	home or rental purchase	Acceptability of Black people living near White people	14520	White adults	consumers	-0.06	0.0011	-54.5455	100000	1	99998	-0.169979	-0.171646	0.00316233	-0.165447	-0.177844	0.00307092	9.71e-06	-0.16996	-0.169998	Constructed hypothetical database from summary survey data. Database assumes 100000 candidates are being rated as acceptable or not. Half are Black and half are White. The percent of Black candidates rated as acceptable equals one minus the discrimination rate, defined as percent who agree that White people have the right to keep Black people out of their neighborhoods. All White candidates are d…	General Social Survey, National Opionion Research Center	0	self-reported discrimination	actual	Here are some opinions other people have expressed in connection with (negro/black)-white relations. Which statement on the card comes closest to how you, yourself, feel?)... White people have a right to keep (negroes/blacks) out of their neighborhoods if they want to, and (negroes/blacks) should respect that right.
1944	good	Jim Crow	housing market	home purchase	Acceptability of Black neighbor	10084	White adults	consumers	-0.69	0.0016	-431.25	100000	1	99998	-0.806428	-1.11673	0.00316233	-1.11053	-1.12293	0.00110577	3.5e-06	-0.806421	-0.806434	Constructed hypothetical database from summary survey data. Database assumes 100000 candidates are being rated as acceptable or not. 80% White 20% Black. The percent of Black candidates rated as acceptable equals one minus the discrimination rate, defined as percent who agree that White people have the right to keep Black people out of their neighborhoods. All White candidates are deemed acceptab…	National Opinion Research Center (NORC)	0	self-reported discrimination	actual	would it make any difference to you if a negro family moved in next door to you?
1946	good	Jim Crow	housing market	home purchase	Acceptability of Black buyer of your home	973	White adults	consumers	-0.62	0.0693	-8.9413	100	1	98	-0.670279	-0.811249	0.101535	-0.612241	-1.01026	0.0553501	0.00554	-0.65943	-0.681127	Constructed hypothetical database from summary survey data. Database assumes 100000 candidates are being rated as acceptable or not. Half are Black and half are White. The percent of Black candidates rated as acceptable equals one minus the discrimination rate, defined as percent who agree that White people have the right to keep Black people out of their neighborhoods. All White candidates are d…	Citation: Minneapolis Tribune. The Minnesota Poll: Politics/Race Relations, Question 23. 31093652.00023. Minneapolis Tribune. Cornell University, Ithaca, NY: Roper Center for Public Opinion Research, 1946. Web. Apr-23-1946.	0	self-reported discrimination	actual	If you were selling your home and you were able to get a slightly better price from a Negro family than from some other would you sell it to them?
1946	good	Jim Crow	housing market	home purchase	Acceptability of Black neighbor	8757	White adults	consumers	-0.09	0.001	-90	100000	1	99998	-0.273737	-0.280899	0.00316233	-0.274701	-0.287097	0.00292534	9.25e-06	-0.273719	-0.273755	Constructed hypothetical database from summary survey data. Database assumes 100000 candidates are being rated as acceptable or not. 80% White 20% Black. The percent of Black candidates rated as acceptable equals one minus the discrimination rate, defined as percent who agree that White people have the right to keep Black people out of their neighborhoods. All White candidates are deemed acceptab…	Minneapolis Tribune	0	self-reported discrimination	actual	supposing a negro family moved into your neighborhood, would you treat them as you do your other neighborhood, would you try to have them moved out, or would you yourself move or wouldn't you care?
1956	good	Jim Crow	housing market	home purchase	Acceptability of Black neighbor	3825	White adults	consumers	-0.46	0.0018	-255.556	100000	1	99998	-0.62855	-0.739016	0.00316233	-0.732818	-0.745215	0.00191295	6.05e-06	-0.628539	-0.628562	Constructed hypothetical database from summary survey data. Database assumes 100000 candidates are being rated as acceptable or not. 80% White 20% Black. The percent of Black candidates rated as acceptable equals one minus the discrimination rate, defined as percent who agree that White people have the right to keep Black people out of their neighborhoods. All White candidates are deemed acceptab…	National Opinion Research Center (NORC)	0	self-reported discrimination	actual	if a negro with the same income and education as you have, moved into your block, would it make any difference to you?
1957	good	Jim Crow	housing market	home purchase	Acceptability of Black neighbor	3600	White adults	consumers	-0.47	0.0018	-261.111	100000	1	99998	-0.636711	-0.752622	0.00316233	-0.746424	-0.75882	0.0018803	5.95e-06	-0.636699	-0.636722	Constructed hypothetical database from summary survey data. Database assumes 100000 candidates are being rated as acceptable or not. 80% White 20% Black. The percent of Black candidates rated as acceptable equals one minus the discrimination rate, defined as percent who agree that White people have the right to keep Black people out of their neighborhoods. All White candidates are deemed acceptab…	Minneapolis Tribune	0	self-reported discrimination	actual	do you approve or disapprove of having white and negro families living in the same neighborhood in this state?
2004	bad	21st century	housing market	interest rate	Effect of race on interest rate	1840	mortage applicants	consumers				1840			0.0430044	0.0430309	0.0233316	0.088761	-0.00269909	0.0232758	0.000543	0.0440679	0.0419409	Data from Quillian, L., Lee, J.J. & Honoré, B. Racial Discrimination in the U.S. Housing and Mortgage Lending Markets: A Quantitative Review of Trends, 1976–2016. Race Soc Probl 12, 13–28 (2020). https://doi.org/10.1007/s12552-019-09276-x	Bocian, D. G., Ernst, K. S., & Li, W. (2008). Race, ethnicity and subprime home loan pricing. Journal of Economics and Business, 60(1–2), 110–124.	1	model-adjusted	actual
2005	bad	21st century	housing market	interest rate	Effect of race on interest rate	75744	mortage applicants	consumers			-1.88889	75744		73708	-0.00695727	-0.00695738	0.00363358	0.000164434	-0.0140792	0.00363335	1.32e-05	-0.00693139	-0.00698314	Data from Quillian, L., Lee, J.J. & Honoré, B. Racial Discrimination in the U.S. Housing and Mortgage Lending Markets: A Quantitative Review of Trends, 1976–2016. Race Soc Probl 12, 13–28 (2020). https://doi.org/10.1007/s12552-019-09276-x	Haughwout, A., Mayer, C., & Tracy, J. (2009). Subprime Mortgage Pricing: The Impact of Race, Ethnicity, and Gender on the Cost of Borrowing. Brookings-Wharton Papers on Urban Affairs, 33–63.	1	model-adjusted	actual
2006	bad	21st century	housing market	interest rate	Effect of race on interest rate	2154042	mortage applicants	consumers			2.56	2154042		2154019	0.00174427	0.00174427	0.000681355	0.00307973	0.00040882	0.000681352	4.64e-07	0.00174518	0.00174336	Data from Quillian, L., Lee, J.J. & Honoré, B. Racial Discrimination in the U.S. Housing and Mortgage Lending Markets: A Quantitative Review of Trends, 1976–2016. Race Soc Probl 12, 13–28 (2020). https://doi.org/10.1007/s12552-019-09276-x	Been, V., Ellen, I., & Madar, J. (2009). The High Cost of Segregation: Exploring Racial Disparities in High Cost Lending. Fordham Urban Law Journal, 36(3), 361–393.	1	model-adjusted	actual
2006	bad	21st century	housing market	interest rate	Effect of race on interest rate	3340428	mortage applicants	consumers			38.3347	3340428		3340406	0.02097	0.020973	0.000547141	0.0220454	0.0199006	0.0005469	2.99e-07	0.0209705	0.0209694	Data from Quillian, L., Lee, J.J. & Honoré, B. Racial Discrimination in the U.S. Housing and Mortgage Lending Markets: A Quantitative Review of Trends, 1976–2016. Race Soc Probl 12, 13–28 (2020). https://doi.org/10.1007/s12552-019-09276-x	Faber, Jacob W. (2013). Racial Dynamics of Subprime Mortgage Lending at the Peak. Housing Policy Debate, 23(2), 328–349. https://doi.org/10.1080/10511482.2013.771788	1	model-adjusted	actual
2014	bad	21st century	housing market	interest rate	Effect of race on interest rate	3812567	mortage applicants	consumers			85.3636	3812567		3812534	0.0436769	0.0437047	0.000512143	0.0447085	0.0427009	0.000511166	2.62e-07	0.0436774	0.0436763	Data from Quillian, L., Lee, J.J. & Honoré, B. Racial Discrimination in the U.S. Housing and Mortgage Lending Markets: A Quantitative Review of Trends, 1976–2016. Race Soc Probl 12, 13–28 (2020). https://doi.org/10.1007/s12552-019-09276-x	Faber, Jacob William. (2018). Segregation and the Geography of Creditworthiness: Racial Inequality in a Recovered Mortgage Market. Housing Policy Debate, 28(2), 215–247. https://doi.org/10.1080/10511482.2017.1341944	1	model-adjusted	actual
2014	bad	21st century	housing market	interest rate	Effect of race on interest rate	2611080	mortage applicants	consumers			25.1818	2611080		2611047	0.0155821	0.0155834	0.000619	0.0167964	0.0143704	0.000619	3.83e-07	0.0155829	0.0155814	Data from Quillian, L., Lee, J.J. & Honoré, B. Racial Discrimination in the U.S. Housing and Mortgage Lending Markets: A Quantitative Review of Trends, 1976–2016. Race Soc Probl 12, 13–28 (2020). https://doi.org/10.1007/s12552-019-09276-x	Faber, Jacob William. (2018). Segregation and the Geography of Creditworthiness: Racial Inequality in a Recovered Mortgage Market. Housing Policy Debate, 28(2), 215–247. https://doi.org/10.1080/10511482.2017.1341944	1	model-adjusted	actual
1976-1977	bad	Post-Civil Rights era	housing market	interest rate	Effect of race on interest rate	3456	mortage applicants	consumers			1.45	3456		3438	0.0247219	0.024727	0.0170177	0.0580817	-0.00862779	0.0170024	0.000289	0.0252888	0.0241551	Data from Quillian, L., Lee, J.J. & Honoré, B. Racial Discrimination in the U.S. Housing and Mortgage Lending Markets: A Quantitative Review of Trends, 1976–2016. Race Soc Probl 12, 13–28 (2020). https://doi.org/10.1007/s12552-019-09276-x	Black, H., Schweitzer, R. L., & Mandell, L. (1978). Discrimination in Mortgage Lending. American Economic Review, 68(2), 186–191.	1	model-adjusted	actual
2000-2008	bad	21st century	housing market	interest rate	Effect of race on risky loan	2394	mortage applicants	consumers			2.07337	2394		2373	0.0425241	0.0425498	0.0204508	0.0826333	0.00246622	0.0204053	0.000417	0.0433415	0.0417067	Data from Quillian, L., Lee, J.J. & Honoré, B. Racial Discrimination in the U.S. Housing and Mortgage Lending Markets: A Quantitative Review of Trends, 1976–2016. Race Soc Probl 12, 13–28 (2020). https://doi.org/10.1007/s12552-019-09276-x	Rugh, J. S., Albright, L., & Massey, D. S. (2015). Race, Space, and Cumulative Disadvantage: A Case Study of the Subprime Lending Collapse. Social Problems, 62(2), 186–218. https://doi.org/10.1093/socpro/spv002	1	model-adjusted	actual
2004-2007	bad	21st century	housing market	interest rate	Effect of race on interest rate	94699	mortage applicants	consumers	0.036	0.007	5.14286	94699	36	94662	0.0167131	0.0167146	0.00324963	0.0230839	0.0103453	0.00324869	1.06e-05	0.0167338	0.0166924	Data from Table 2 column 5 (top panel), fully specified model with lender fixed effects	Bayer, P., Ferreira, F., & Ross, S. L. (2018). What Drives Racial and Ethnic Differences in High-Cost Mortgages? The Role of High-Risk Lenders. The Review of Financial Studies, 31(1), 175–205	1	model-adjusted	actual
2004-2007	bad	21st century	housing market	interest rate	Effect of race on interest rate	91242	refinance applicants	consumers	0.019	0.004	4.75	91242	36	91205	0.0157264	0.0157277	0.00331062	0.0222166	0.00923892	0.00330977	1.1e-05	0.0157479	0.015705	Data from Table 2 column 5 (bottom panel), fully specified model with lender fixed effects	Bayer, P., Ferreira, F., & Ross, S. L. (2018). What Drives Racial and Ethnic Differences in High-Cost Mortgages? The Role of High-Risk Lenders. The Review of Financial Studies, 31(1), 175–205	1	model-adjusted	actual
2004-2013	bad	21st century	housing market	interest rate	Effect of race on interest rate	594302	mortage applicants	consumers			-57.17	594302		594296	-0.0739564	-0.0740917	0.00129717	-0.0715492	-0.0766341	0.00129007	1.67e-06	-0.0739531	-0.0739597	Data from Quillian, L., Lee, J.J. & Honoré, B. Racial Discrimination in the U.S. Housing and Mortgage Lending Markets: A Quantitative Review of Trends, 1976–2016. Race Soc Probl 12, 13–28 (2020). https://doi.org/10.1007/s12552-019-09276-x	Delis, M. D., & Papadopoulos, P. (2018). Mortgage Lending Discrimination Across the U.S.: New Methodology and New Evidence. Journal of Financial Services Research, 1–28.	1	model-adjusted	actual
1979	good	Post-Civil Rights era	housing market	loan approval	Effect of race on loan approval	618	mortage applicants	consumers			0.49	618		585	0.0202549	0.0202576	0.0403239	0.0992924	-0.0587772	0.040242	0.00162	0.0234276	0.0170821	Data from Quillian, L., Lee, J.J. & Honoré, B. Racial Discrimination in the U.S. Housing and Mortgage Lending Markets: A Quantitative Review of Trends, 1976–2016. Race Soc Probl 12, 13–28 (2020). https://doi.org/10.1007/s12552-019-09276-x	Miller, S. M. (1988). Discrimination in the Home-Mortgage Accept-Reject Decision: The Case of Hartford. Housing Finance Review, 7, 19–29.	1	model-adjusted	actual
1990	good	Post-Civil Rights era	housing market	loan approval	Effect of race on loan approval	1996	mortage applicants	consumers			-6.86229	1996		1978	-0.152492	-0.153691	0.0223999	-0.109787	-0.197594	0.0218681	0.000489	-0.151532	-0.153451	Data from Quillian, L., Lee, J.J. & Honoré, B. Racial Discrimination in the U.S. Housing and Mortgage Lending Markets: A Quantitative Review of Trends, 1976–2016. Race Soc Probl 12, 13–28 (2020). https://doi.org/10.1007/s12552-019-09276-x	Schill, M. H., & Wachter, S. M. (245AD). A Tale of Two Cities: Racial and Ethnic Geographic Disparities in Home Mortgage Lending in Boston and Philadelphia. Journal of Housing Research, 4(2), 1993.	1	model-adjusted	actual
2000	good	21st century	housing market	loan approval	Effect of race on probability of getting information details from mortgage lender	153	mortage applicants	consumers	-0.124	0.043	-2.88372	306	1	304	-0.163176	-0.164648	0.0574485	-0.0520488	-0.277247	0.0557352	0.00319	-0.156931	-0.169421	Table 3, information index, summed across cities. Analysis simulated using hypothetical database that matches the summary data. Pairs broken out into individual applicants N=153 X 2	Ross, Stephen L., Margery Austin Turner, Erin Godfrey, and Robin R. Smith. "Mortgage lending in Chicago and Los Angeles: A paired testing study of the pre-application process." Journal of Urban Economics 63, no. 3 (2008): 902-919.	1	audit	actual
2006	good	21st century	housing market	loan approval	Effect of race on loan approval	3340428	mortage applicants	consumers			-60.5028	3340428		3340406	-0.0330855	-0.0330976	0.000547141	-0.0320252	-0.03417	0.000546542	2.99e-07	-0.0330849	-0.0330861	Data from Quillian, L., Lee, J.J. & Honoré, B. Racial Discrimination in the U.S. Housing and Mortgage Lending Markets: A Quantitative Review of Trends, 1976–2016. Race Soc Probl 12, 13–28 (2020). https://doi.org/10.1007/s12552-019-09276-x	Faber, Jacob W. (2013). Racial Dynamics of Subprime Mortgage Lending at the Peak. Housing Policy Debate, 23(2), 328–349. https://doi.org/10.1080/10511482.2013.771788	1	model-adjusted	actual
1990-1992	good	Post-Civil Rights era	housing market	loan approval	effect of race on mortgage approval	9235	mortage applicants	consumers			0.553493	9235		9218	0.00576483	0.00576489	0.0104076	0.0261639	-0.0146341	0.0104062	0.000108	0.00597707	0.00555259	Data from Quillian, L., Lee, J.J. & Honoré, B. Racial Discrimination in the U.S. Housing and Mortgage Lending Markets: A Quantitative Review of Trends, 1976–2016. Race Soc Probl 12, 13–28 (2020). https://doi.org/10.1007/s12552-019-09276-x	Holloway, S. R. (1998). Exploring the Neighborhood Contingency of Race Discrimination in Mortgage Lending in Columbus, Ohio. Annals of the Association of American Geographers, 88(2), 252–276.	1	model-adjusted	actual
1993-2000	good	Post-Civil Rights era	housing market	loan approval	Effect of race on loan approval	1160728	mortage applicants	consumers			2.56	1160728		1160699	0.00237618	0.00237618	0.000928187	0.00419543	0.000556936	0.000928181	8.62e-07	0.00237787	0.00237449	Data from Quillian, L., Lee, J.J. & Honoré, B. Racial Discrimination in the U.S. Housing and Mortgage Lending Markets: A Quantitative Review of Trends, 1976–2016. Race Soc Probl 12, 13–28 (2020). https://doi.org/10.1007/s12552-019-09276-x	Ashton, P. (2008). Advantage or Disadvantage? The Changing Institutional Landscape of Underserved Mortgage Markets. Urban Affairs Review, 43(3), 352–402. https://doi.org/10.1177/1078087407306326	1	model-adjusted	actual
2004-2013	good	21st century	housing market	loan approval	Effect of race on housing loan	6452279	mortage applicants	consumers			26.73	6452279		6452273	0.0105225	0.0105229	0.00039368	0.0112945	0.00975127	0.000394	1.55e-07	0.0105228	0.0105222	Data from Quillian, L., Lee, J.J. & Honoré, B. Racial Discrimination in the U.S. Housing and Mortgage Lending Markets: A Quantitative Review of Trends, 1976–2016. Race Soc Probl 12, 13–28 (2020). https://doi.org/10.1007/s12552-019-09276-x	Delis, M. D., & Papadopoulos, P. (2018). Mortgage Lending Discrimination Across the U.S.: New Methodology and New Evidence. Journal of Financial Services Research, 1–28.	1	model-adjusted	actual
2012	good	21st century	housing market	rental price	Effect of race on consumer willingness to spend	3752	Air B&B rental price	landlords	-17.762	3.47	-5.11873	3752	20	3731	-0.0835084	-0.0837033	0.0163321	-0.0516924	-0.115714	0.0162139	0.000265	-0.0829896	-0.0840272	Data from Table 3.	Edelman, B. G., & Luca, M. (2014). Digital discrimination: The case of Airbnb. com. Harvard Business School NOM Unit Working Paper, (14-054).	1	model-adjusted	actual
1924	bad	Jim Crow	housing market	restrictive covenants forbidding Black ownership of homes	Acceptability of Black people living near White people	84	properties	Sample of deeds	0.48	0.0017664	271.739	100000	1	99998	0.651744	0.778325	0.00316233	0.784523	0.772127	0.00181905	5.75e-06	0.651755	0.651733	Used survey/policy algorithm to create pseudo-database and estimate r. Database assumes 80% White population share.In her sample of 84 deeds, 48% had anti-Black covenants. Her data were obtained from members of the Home Building and Subdividers Division of the National Association of Real Estate Boards and the Chicago Real Estate Board (55 deeds). 29 deeds were taken from the Olmsted Brothers of …	Helen Monchow, The Use of Deed Restrictions in Subdivision Development. (Insitute for Research in Land Economics and Public Utiliteis, Chicago, 1928).	0	policy	actual
1948	bad	Jim Crow	housing market	restrictive covenants forbidding Black ownership of homes	Acceptability of Black people living near White people	30000	properties	Washington DC	0.99	0.0004	2475	100000	1	99998	0.991936	2.75475	0.00316233	2.76094	2.74855	5.08e-05	1.61e-07	0.991937	0.991936	Used survey/policy algorithm to create pseudo-database and estimate r using 99% value. Database assumes 80% White population share. Residential associations such as the Federal of Citizens' Associations effectively forbid Black people from living in majority White areas. The 1948 Washington Real Estate Board Code of Ethics forbade renting or selling to Black people in White neighborhoods. OF the …	Wendell E. Pritchett, “A National Issue: Segregation in the District of Columbia and the Civil Rights Movement at Mid-Century Civil Rights Movement at Mid-Century,” Georgetown Law Journal 93 (2005): 1328.	0	policy	actual
1900-1947	bad	Jim Crow	housing market	restrictive covenants forbidding Black ownership of homes	Acceptability of Black people living near White people	8599	properties	Kansas City	0.77	0.0015	513.333	100000	1	99998	0.851416	1.26128	0.00316233	1.26748	1.25508	0.000869918	2.75e-06	0.851421	0.851411	Used survey/policy algorithm to create pseudo-database and estimate r. Database assumes 80% White population share. 77% of parecels were found to have covenants in Kansas City metro area	Gotham, K. F. (2000). Urban space, restrictive covenants and the origins of racial residential segregation in a US city, 1900–50. International Journal of Urban and Regional Research, 24(3), 616-633.	0	policy	actual
1900-1960	bad	Jim Crow	housing market	restrictive covenants forbidding Black ownership of homes	Acceptability of Black people living near White people	435765	properties	Hennepin County	0.05	0.0008	62.5	100000	1	99998	0.193894	0.19638	0.00316233	0.202578	0.190182	0.00304341	9.62e-06	0.193912	0.193875	Used survey/policy algorithm to create pseudo-database and estimate r. Database assumes 80% White population share. From the website: "The novel data on racial covenants in Hennepin County, Minnesota, comes from the Mapping Prejudice Project, providing a complete census of covenanted deeds in the county. The data collection involved at least five individuals examining every sale deed from 1900 to…	Sood, Aradhya and E-Solberg, Kevin, The Long Shadow of Housing Discrimination: Evidence from Racial Covenants (August 30, 2024). Available at SSRN: https://ssrn.com/abstract=4606234 or http://dx.doi.org/10.2139/ssrn.4606234	0	policy	actual
1920-1933	bad	Jim Crow	housing market	restrictive covenants forbidding Black ownership of homes	Acceptability of Black people living near White people	192	properties	Montgomery County	0.53	0.0018	294.444	100000	1	99998	0.681454	0.831823	0.00316233	0.838021	0.825625	0.00169379	5.36e-06	0.681464	0.681443	Used survey/policy algorithm to create pseudo-database and estimate r. Database assumes 80% White population share. 53% of parecels were found to have covenants	John Libertz, Rebeccah Ballo, and Jason Sartori. 2022. "Briefing on the Mapping Segregation Project" (Montgomery Planning), Attachment A, https://montgomeryplanning.org/wp-content/uploads/2022/12/Mapping-Segregation-Staff-Report-Attachment-A.pdf	0	policy	actual
1925-1944	bad	Jim Crow	housing market	restrictive covenants forbidding Black ownership of homes	Acceptability of Black people living near White people	949744	properties	Chicago	0.1	0.0011	90.9091	100000	1	99998	0.276292	0.283663	0.00316233	0.289861	0.277465	0.00292089	9.24e-06	0.27631	0.276274	Used survey/policy algorithm to create pseudo-database and estimate r using 10% value. Database assumes 80% White population share. Volunteers and researchers with the Chicago Covenants Project have searched through real estate index books covering approximately 20% of the City of Chicago. Since the project’s beginning in the Spring of 2021, we have located approximately 1000 covenants covering 1…	Numerator: Chicago Covenants Project, https://experience.arcgis.com/experience/32c7a747127e46dda110e82848286394/, accessed February 1, 2025. Denominator (housing units in Chicago in 1940) is from Herman Long and Charles S Johnson. People vs Property: Race Restrictive Covenants in Housing (Fisk University Pree, Nashville TN, 1947)	0	policy	actual
1934-1948	bad	Jim Crow	housing market	restrictive covenants forbidding Black ownership of homes	Acceptability of Black people living near White people	1029	properties	Montgomery County	0.53	0.0018	294.444	100000	1	99998	0.681454	0.831823	0.00316233	0.838021	0.825625	0.00169379	5.36e-06	0.681464	0.681443	Used survey/policy algorithm to create pseudo-database and estimate r. Database assumes 80% White population share. 53% of parecels were found to have covenants	John Libertz, Rebeccah Ballo, and Jason Sartori. 2022. "Briefing on the Mapping Segregation Project" (Montgomery Planning), Attachment A, https://montgomeryplanning.org/wp-content/uploads/2022/12/Mapping-Segregation-Staff-Report-Attachment-A.pdf	0	policy	actual
1938-1942	bad	Jim Crow	housing market	restrictive covenants forbidding Black ownership of homes	Acceptability of Black people living near White people	11300	properties	New York counties: Queens, Nassau, and Westchester	0.55	0.0018	305.556	100000	1	99998	0.694871	0.857314	0.00316233	0.863512	0.851116	0.00163539	5.17e-06	0.694881	0.694861	Used survey/policy algorithm to create pseudo-database and estimate r. Database assumes 80% White population share. 54.8% of parecels were found to have covenants	John P. Dean. 1947. "Only Caucasian: A Study of Race Covenants" The Journal of Land & Public Utility Economics, Vol. 23, No. 4, pp. 428-432	0	policy	actual
1949-1952	bad	Jim Crow	housing market	restrictive covenants forbidding Black ownership of homes	Acceptability of Black people living near White people	416	properties	Montgomery County	0.18	0.0014	128.571	100000	1	99998	0.376642	0.39614	0.00316233	0.402338	0.389942	0.00271369	8.58e-06	0.376658	0.376625	Used survey/policy algorithm to create pseudo-database and estimate r. Database assumes 80% White population share. 18% of parecels were found to have covenants	John Libertz, Rebeccah Ballo, and Jason Sartori. 2022. "Briefing on the Mapping Segregation Project" (Montgomery Planning), Attachment A, https://montgomeryplanning.org/wp-content/uploads/2022/12/Mapping-Segregation-Staff-Report-Attachment-A.pdf	0	policy	actual
2013-2021	good	21st century	housing market	sale price	Effect of Black neighborhood share of population on home value	384111	Properties	black composition of neighborhood	-0.024	0.00143198	-16.76	384111	30	384080	-0.0270336	-0.0270402	0.00161352	-0.0238777	-0.0302027	0.00161233	2.6e-06	-0.0270285	-0.0270387	Estimated from primary models with property and neighborhood characteristics	Rothwell J. 2024. Aggregate Discrimination in the Absence of Individual Discrimination: An Analysis of Home Appraisal Data (SSRN)	1	model-adjusted	Black share of population
1944	bad	Jim Crow	housing market	support for restrictive covenants	Acceptability of Black people living near White people	45	Neighborhood Improvement Associations in Chicago and Detroit	Community housing leaders in Chicago and Detroit	0.6	0.0017	352.941	100000	1	99998	0.744785	0.96114	0.00316233	0.967338	0.954942	0.00140815	4.45e-06	0.744794	0.744776	Used survey/policy algorithm to create pseudo-database and estimate r. Database assumes 80% White population share. Table 12. Out of 45 organizations surveyed, 36 (60%) encouraged or supported covenants that prohibited Black people from buying homes in the area.	Herman Long and Charles S Johnson. People vs Property: Race Restrictive Covenants in Housing (Fisk University Pree, Nashville TN, 1947)	1	self-reported discrimination	actual	Are covenants encouraged or sponsored by your Neighborhood Improvement Association? No exact wording given.
1944	bad	Jim Crow	housing market	support for restrictive covenants	Acceptability of Black people living near White people	45	Neighborhood Improvement Associations in Chicago and Detroit	Community housing leaders	0.87	0.0012	725	100000	1	99998	0.916604	1.56735	0.00316233	1.57355	1.56116	0.000505453	1.6e-06	0.916607	0.916601	Used survey/policy algorithm to create pseudo-database and estimate r. Database assumes 80% White population share. Table 13. 86.7% (39/45) said negroes were objectionable in the neighborhood. The next highest was Japanese (31%), followed by Jews (11.7%), Mexican (9.9%), and Italian (5.9). 21 of 45 said no groups were objectionable, aside from negroes	Herman Long and Charles S Johnson. People vs Property: Race Restrictive Covenants in Housing (Fisk University Pree, Nashville TN, 1947)	1	self-reported discrimination	actual	Are negroes objectionable or not wanted in the neighborhood your association represents?
1977	good	Post-Civil Rights era	housing market	transactions	Effect of race on responsiveness of agent or seller to inequires	6080	prospective rental or home-purchase buyers	consumers		0.015496	-8.99489	6080			-0.160837	-0.162246	0.0128279	-0.137103	-0.187388	0.012494	0.00016	-0.160523	-0.161151	Data from Quillian, L., Lee, J.J. & Honoré, B. Racial Discrimination in the U.S. Housing and Mortgage Lending Markets: A Quantitative Review of Trends, 1976–2016. Race Soc Probl 12, 13–28 (2020). https://doi.org/10.1007/s12552-019-09276-x	Wienk, R. E. (1979). Measuring racial discrimination in American housing markets: The housing market practices survey (Vol. 444). Department of Housing and Urban Development, Office of Policy Development and Research, Division of Evaluation.	1	model-adjusted	actual
1982	good	Post-Civil Rights era	housing market	transactions	Effect of race on responsiveness of agent or seller to inequires	238	prospective rental or home-purchase buyers	consumers		0.068972	-0.786453	238			-0.069426	-0.0695379	0.0652328	0.0583184	-0.197394	0.0646439	0.00419	-0.0612131	-0.0776389	Data from Quillian, L., Lee, J.J. & Honoré, B. Racial Discrimination in the U.S. Housing and Mortgage Lending Markets: A Quantitative Review of Trends, 1976–2016. Race Soc Probl 12, 13–28 (2020). https://doi.org/10.1007/s12552-019-09276-x	James, Franklin J. "Urban economies: Trends, forces, and implications for the president's national urban policy." Cityscape (1995): 67-123.	1	model-adjusted	actual
1999	good	Post-Civil Rights era	housing market	transactions	Effect of race on responsiveness of agent or seller to inequires	1264	prospective rental or home-purchase buyers	consumers		0.057943	-1.80241	1264			-0.120943	-0.121538	0.0281606	-0.0663431	-0.176733	0.0277267	0.00078	-0.119414	-0.122472	Data from Quillian, L., Lee, J.J. & Honoré, B. Racial Discrimination in the U.S. Housing and Mortgage Lending Markets: A Quantitative Review of Trends, 1976–2016. Race Soc Probl 12, 13–28 (2020). https://doi.org/10.1007/s12552-019-09276-x	Massey, D. S., & Lundy, G. (2001). Use of Black English and racial discrimination in urban housing markets: New methods and findings. Urban affairs review, 36(4), 452-469.	1	model-adjusted	actual
2000	good	21st century	housing market	transactions	Effect of race on responsiveness of agent or seller to inequires	6912	prospective rental or home-purchase buyers	consumers		0.020006	-2.51549	6912			-0.052327	-0.0523748	0.0120307	-0.0287946	-0.0759551	0.0119961	0.000144	-0.0520442	-0.0526098	Data from Quillian, L., Lee, J.J. & Honoré, B. Racial Discrimination in the U.S. Housing and Mortgage Lending Markets: A Quantitative Review of Trends, 1976–2016. Race Soc Probl 12, 13–28 (2020). https://doi.org/10.1007/s12552-019-09276-x	Choi, S. J., Ondrich, J., & Yinger, J. (2005). Do rental agents discriminate against minority customers? Evidence from the 2000 Housing Discrimination Study. Journal of Housing Economics, 14(1), 1-26.	1	audit	actual
2003	good	21st century	housing market	transactions	Effect of race on responsiveness of agent or seller to inequires	1482	prospective rental or home-purchase buyers	consumers		0.030662	-9.87741	1482			-0.341473	-0.355759	0.0260025	-0.304794	-0.406724	0.022955	0.000596	-0.340304	-0.342642	Data from Quillian, L., Lee, J.J. & Honoré, B. Racial Discrimination in the U.S. Housing and Mortgage Lending Markets: A Quantitative Review of Trends, 1976–2016. Race Soc Probl 12, 13–28 (2020). https://doi.org/10.1007/s12552-019-09276-x	Carpusor, A. G., & Loges, W. E. (2006). Rental discrimination and ethnicity in names 1. Journal of applied social psychology, 36(4), 934-952.	1	audit	stereotypical names
2009	good	21st century	housing market	transactions	Effect of race on responsiveness of agent or seller to inequires	35160	prospective rental or home-purchase buyers	consumers		0.017193	-1.96727	35160			-0.042508	-0.0425336	0.00533328	-0.0320804	-0.0529869	0.00532349	2.84e-05	-0.0424524	-0.0425636	Data from Quillian, L., Lee, J.J. & Honoré, B. Racial Discrimination in the U.S. Housing and Mortgage Lending Markets: A Quantitative Review of Trends, 1976–2016. Race Soc Probl 12, 13–28 (2020). https://doi.org/10.1007/s12552-019-09276-x	Friedman, S., Squires, G. D., & Galvan, C. (2010, May). Cybersegregation in Boston and Dallas: Is Neil a more desirable tenant than Tyrone or Jorge. In Population Association of America 2010 Annual Meeting. http://paa2010. princeton. edu.	1	audit	actual
2009	good	21st century	housing market	transactions	Effect of race on responsiveness of agent or seller to inequires	21772	prospective rental or home-purchase buyers	consumers		0.031026	-1.51053	21772			-0.030002	-0.030011	0.00677768	-0.0167268	-0.0432953	0.00677126	4.59e-05	-0.0299121	-0.0300919	Data from Quillian, L., Lee, J.J. & Honoré, B. Racial Discrimination in the U.S. Housing and Mortgage Lending Markets: A Quantitative Review of Trends, 1976–2016. Race Soc Probl 12, 13–28 (2020). https://doi.org/10.1007/s12552-019-09276-x	Hanson, A., & Hawley, Z. (2011). Do landlords discriminate in the rental housing market? Evidence from an internet field experiment in US cities. Journal of urban Economics, 70(2-3), 99-114.	1	audit	actual
2009	good	21st century	housing market	transactions	Effect of race on responsiveness of agent or seller to inequires	12612	prospective rental or home-purchase buyers	consumers		0.0099	-1.21772	12612			-0.015334	-0.0153352	0.00890553	0.00211963	-0.03279	0.00890273	7.93e-05	-0.0151786	-0.0154894	Data from Quillian, L., Lee, J.J. & Honoré, B. Racial Discrimination in the U.S. Housing and Mortgage Lending Markets: A Quantitative Review of Trends, 1976–2016. Race Soc Probl 12, 13–28 (2020). https://doi.org/10.1007/s12552-019-09276-x	Hanson, A., Hawley, Z., & Taylor, A. (2011). Subtle discrimination in the rental housing market: Evidence from e-mail correspondence with landlords. Journal of Housing Economics, 20(4), 276-284.	1	audit	actual
2009	good	21st century	housing market	transactions	Effect of race on responsiveness of agent or seller to inequires	32700	prospective rental or home-purchase buyers	consumers	-0.093	0.015	-6.2	4226	1	32700	-0.0342659	-0.0342794	0.0153883	-0.00411838	-0.0644403	0.0153666	0.000236	-0.0338026	-0.0347293	Data from Table 7, column 1, showing main effect of Black race. Also see: Quillian, L., Lee, J.J. & Honoré, B. Racial Discrimination in the U.S. Housing and Mortgage Lending Markets: A Quantitative Review of Trends, 1976–2016. Race Soc Probl 12, 13–28 (2020). https://doi.org/10.1007/s12552-019-09276-x	Ewens, Michael, Bryan Tomlin, and Liang Choon Wang. "Statistical discrimination or prejudice? A large sample field experiment." Review of Economics and Statistics 96, no. 1 (2014): 119-134.	1	audit	stereotypical names
2012	good	21st century	housing market	transactions	Effect of race on responsiveness of agent or seller to inequires	137352	prospective rental or home-purchase buyers	consumers		0.013029	-0.513513	137352			-0.00924	-0.00924026	0.00269828	-0.00395163	-0.0145289	0.00269803	7.28e-06	-0.00922573	-0.00925427	Data from Quillian, L., Lee, J.J. & Honoré, B. Racial Discrimination in the U.S. Housing and Mortgage Lending Markets: A Quantitative Review of Trends, 1976–2016. Race Soc Probl 12, 13–28 (2020). https://doi.org/10.1007/s12552-019-09276-x	Turner, Margery Austin, Robert Santos, Diane K. Levy, Douglas A. Wissoker, Claudia Aranda, and Rob Pitingolo. "Housing discrimination against racial and ethnic minorities 2012: Executive summary." (2016).	1	audit	actual
2016	good	21st century	housing market	transactions	Effect of race on responsiveness of agent or seller to inequires	7013	prospective rental or home-purchase buyers	consumers		0.017882	2.56324	7013			0.025751	0.0257567	0.0119438	0.0491665	0.00234693	0.0119	0.000143	0.0260303	0.0254717	Data from Quillian, L., Lee, J.J. & Honoré, B. Racial Discrimination in the U.S. Housing and Mortgage Lending Markets: A Quantitative Review of Trends, 1976–2016. Race Soc Probl 12, 13–28 (2020). https://doi.org/10.1007/s12552-019-09276-x	Murchie, J., & Pang, J. (2018). Rental housing discrimination across protected classes: Evidence from a randomized experiment. Regional Science and Urban Economics, 73, 170-179.	1	audit	actual
2012-2013	good	21st century	housing market	transactions	Effect of race on responsiveness of agent or seller to inequires	1116	prospective rental or home-purchase buyers	consumers		0.029546	-1.06297	1116			-0.045028	-0.0450585	0.0299745	0.0136916	-0.103809	0.0299	0.000895	-0.0432745	-0.0467815	Data from Quillian, L., Lee, J.J. & Honoré, B. Racial Discrimination in the U.S. Housing and Mortgage Lending Markets: A Quantitative Review of Trends, 1976–2016. Race Soc Probl 12, 13–28 (2020). https://doi.org/10.1007/s12552-019-09276-x	Fang, A. H., Guess, A. M., & Humphreys, M. (2019). Can the government deter discrimination? Evidence from a randomized intervention in New York City. The Journal of Politics, 81(1), 127-141.	1	audit	actual
1980	bad	Post-Civil Rights era	labor market	affirmative action for Black people	Whether Black people should be given preferential treatment	25884	Adults	Adults	-0.12	0.0464	-2.5849	100	1	98	-0.252644	-0.258235	0.101535	-0.0592268	-0.457243	0.0941	0.00941	-0.234202	-0.271085	Constructed hypothetical database from summary survey data. Database assumes 100 hypothetical candidates of equal quality are being rated as preferrable or not. Half are Black and half are White. The percent of White candidates rated as preferrable equals one minus the discrimination rate, which is the share who agree with affirmative action preferences for Black people. All Black candidates are …	American National Election Study 1980 (Post-Election), Cornell University, Ithaca, NY: Roper Center for Public Opinion Research	0	self-reported discrimination	actual	Some people feel that the government in Washington should make every effort to improve the social and economic position of blacks and other minority groups, even if it means giving them preferential treatment. Suppose these people are at one end of the scale at point number 1. Others feel that the government should not make any special effort to help minorities because they should help themselves…
1987	bad	Post-Civil Rights era	labor market	affirmative action for Black people	Whether Black people should be given preferential treatment	21220	Adults	Adults	-0.12	0.0464	-2.5849	100	1	98	-0.252644	-0.258235	0.101535	-0.0592268	-0.457243	0.0941	0.00941	-0.234202	-0.271085	Constructed hypothetical database from summary survey data. Database assumes 100 hypothetical candidates of equal quality are being rated as preferrable or not. Half are Black and half are White. The percent of White candidates rated as preferrable equals one minus the discrimination rate, which is the share who agree with affirmative action preferences for Black people. All Black candidates are …	People, The Press & Politics Poll, Cornell University, Ithaca, NY: Roper Center for Public Opinion Research	0	self-reported discrimination	actual	(Now I am going to read you a series of statements that will help us understand how you feel about a number of things. For each statement, please tell me whether you completely agree with it, mostly agree with it, mostly disagree with it or completely disagree with it.)... We should make every possible effort to improve the position of blacks and other minorities, even if it means giving them pre…
1988	bad	Post-Civil Rights era	labor market	affirmative action for Black people	Whether Black people should be given preferential treatment	15105	Adults	Adults	-0.12	0.0464	-2.5849	100	1	98	-0.252644	-0.258235	0.101535	-0.0592268	-0.457243	0.0941	0.00941	-0.234202	-0.271085	Constructed hypothetical database from summary survey data. Database assumes 100 hypothetical candidates of equal quality are being rated as preferrable or not. Half are Black and half are White. The percent of White candidates rated as preferrable equals one minus the discrimination rate, which is the share who agree with affirmative action preferences for Black people. All Black candidates are …	People, The Press & Politics Poll, Cornell University, Ithaca, NY: Roper Center for Public Opinion Research	0	self-reported discrimination	actual	We should make every possible effort to improve the position of blacks and other minorities, even if it means giving them preferential treatment.
1989	bad	Post-Civil Rights era	labor market	affirmative action for Black people	Whether Black people should be given preferential treatment	15883	Adults	Adults	-0.12	0.0464	-2.5849	100	1	98	-0.252644	-0.258235	0.101535	-0.0592268	-0.457243	0.0941	0.00941	-0.234202	-0.271085	Constructed hypothetical database from summary survey data. Database assumes 100 hypothetical candidates of equal quality are being rated as preferrable or not. Half are Black and half are White. The percent of White candidates rated as preferrable equals one minus the discrimination rate, which is the share who agree with affirmative action preferences for Black people. All Black candidates are …	People, The Press & Politics Poll, Cornell University, Ithaca, NY: Roper Center for Public Opinion Research	0	self-reported discrimination	actual	We should make every possible effort to improve the position of blacks and other minorities, even if it means giving them preferential treatment
1990	bad	Post-Civil Rights era	labor market	affirmative action for Black people	Whether Black people should be given preferential treatment	15020	Adults	Adults	-0.12	0.0464	-2.5849	100	1	98	-0.252644	-0.258235	0.101535	-0.0592268	-0.457243	0.0941	0.00941	-0.234202	-0.271085	Constructed hypothetical database from summary survey data. Database assumes 100 hypothetical candidates of equal quality are being rated as preferrable or not. Half are Black and half are White. The percent of White candidates rated as preferrable equals one minus the discrimination rate, which is the share who agree with affirmative action preferences for Black people. All Black candidates are …	People, The Press & Politics Poll 1990, Cornell University, Ithaca, NY: Roper Center for Public Opinion Research	0	self-reported discrimination	actual	(I am going to read you a series of statements that will help us understand how you feel about a number of things. For each statement, please tell me whether you completely agree with it, mostly agree with it, mostly disagree with it or completely disagree with it.)... We should make every possible effort to improve the position of blacks and other minorities, even if it means giving them prefere…
1991	bad	Post-Civil Rights era	labor market	affirmative action for Black people	Whether Black people should be given preferential treatment	6060	Adults	Adults	-0.22	0.0592	-3.7176	100	1	98	-0.351562	-0.367225	0.101535	-0.168217	-0.566233	0.0881	0.00881	-0.334298	-0.368826	Constructed hypothetical database from summary survey data. Database assumes 100 hypothetical candidates of equal quality are being rated as preferrable or not. Half are Black and half are White. The percent of White candidates rated as preferrable equals one minus the discrimination rate, which is the share who agree with affirmative action preferences for Black people. All Black candidates are …	Times Mirror News Interest Index, Cornell University, Ithaca, NY: Roper Center for Public Opinion Research	0	self-reported discrimination	actual	(I am going to read you a series of statements about a number of different things. For each, please tell me whether you completely agree with it, mostly agree with it, mostly disagree with it or completely disagree with it.) We should make every effort to improve the position of blacks and other minorities, even if it means giving them preferential treatment.
1992	bad	Post-Civil Rights era	labor market	affirmative action for Black people	Whether Black people should be given preferential treatment	3972	Adults	Adults	-0.42	0.0705	-5.9567	100	1	98	-0.515577	-0.570297	0.101535	-0.371289	-0.769305	0.0738	0.00738	-0.501115	-0.53004	Constructed hypothetical database from summary survey data. Database assumes 100 hypothetical candidates of equal quality are being rated as preferrable or not. Half are Black and half are White. The percent of White candidates rated as preferrable equals one minus the discrimination rate, which is the share who agree with affirmative action preferences for Black people. All Black candidates are …	American Public Opinion About Privacy At Home And At Work, Cornell University, Ithaca, NY: Roper Center for Public Opinion Research	0	self-reported discrimination	actual	When it comes to seeing that blacks and other minorities have equal opportunities in life, do you think this country still needs to do more, that it has done enough, or that it has gone too far by giving minorities preferential treatment?
1993	bad	Post-Civil Rights era	labor market	affirmative action for Black people	Whether Black people should be given preferential treatment	7535	Adults	Adults	-0.16	0.0524	-3.0551	100	1	98	-0.294888	-0.303912	0.101535	-0.104904	-0.50292	0.0918	0.00918	-0.276903	-0.312874	Constructed hypothetical database from summary survey data. Database assumes 100 hypothetical candidates of equal quality are being rated as preferrable or not. Half are Black and half are White. The percent of White candidates rated as preferrable equals one minus the discrimination rate, which is the share who agree with affirmative action preferences for Black people. All Black candidates are …	People, The Press & Politics Poll, Cornell University, Ithaca, NY: Roper Center for Public Opinion Research	0	self-reported discrimination	actual	(Now I would like to read you some more statements that will help us understand how you feel about things. For each one I read please just tell me if you completely agree with it, mostly agree with it, mostly disagree with it, or completely disagree with it.)... We should make every possible effort to improve the position of blacks and other minorities, even if it means giving them preferential t…
1994	bad	Post-Civil Rights era	labor market	affirmative action for Black people	Whether Black people should be given preferential treatment	5045	Adults	Adults	-0.14	0.0496	-2.8243	100	1	98	-0.27435	-0.281562	0.101535	-0.0825545	-0.48057	0.0929	0.00929	-0.256134	-0.292567	Constructed hypothetical database from summary survey data. Database assumes 100 hypothetical candidates of equal quality are being rated as preferrable or not. Half are Black and half are White. The percent of White candidates rated as preferrable equals one minus the discrimination rate, which is the share who agree with affirmative action preferences for Black people. All Black candidates are …	People, The Press & Politics Poll--New Political Landscape, Cornell University, Ithaca, NY: Roper Center for Public Opinion Research	0	self-reported discrimination	actual	(Now I am going to read you another series of statements on some different topics. For each statement, please tell me if you completely agree with it, mostly agree with it, mostly disagree with it or completely disagree with it.) We should make every possible effort to improve the position of blacks and other minorities, even if it means giving them preferential treatment.
1995	bad	Post-Civil Rights era	labor market	affirmative action for Black people	Whether Black people should be given preferential treatment	4092	Adults	Adults	-0.44	0.0709	-6.2048	100	1	98	-0.531083	-0.591652	0.101535	-0.392644	-0.79066	0.0722	0.00722	-0.51694	-0.545225	Constructed hypothetical database from summary survey data. Database assumes 100 hypothetical candidates of equal quality are being rated as preferrable or not. Half are Black and half are White. The percent of White candidates rated as preferrable equals one minus the discrimination rate, which is the share who agree with affirmative action preferences for Black people. All Black candidates are …	Women's Equality Poll 1995, Cornell University, Ithaca, NY: Roper Center for Public Opinion Research	0	self-reported discrimination	actual	Do you favor or oppose federal laws requiring preferential treatment programs for...blacks...provided there are no rigid quotas?
1997	bad	Post-Civil Rights era	labor market	affirmative action for Black people	Whether Black people should be given preferential treatment	5825	Adults	Adults	-0.16	0.0524	-3.0551	100	1	98	-0.294888	-0.303912	0.101535	-0.104904	-0.50292	0.0918	0.00918	-0.276903	-0.312874	Constructed hypothetical database from summary survey data. Database assumes 100 hypothetical candidates of equal quality are being rated as preferrable or not. Half are Black and half are White. The percent of White candidates rated as preferrable equals one minus the discrimination rate, which is the share who agree with affirmative action preferences for Black people. All Black candidates are …	Pew Research Center for the People & the Press Values Update Survey, Cornell University, Ithaca, NY: Roper Center for Public Opinion Research	0	self-reported discrimination	actual	(I am going to read you another series of statements on some different topics. For each statement, please tell me if you completely agree with it, mostly agree with it, mostly disagree with it, or completely disagree with it.)... We should make every possible effort to improve the position of blacks and other minorities, even if it means giving them preferential treatment.
1999	bad	Post-Civil Rights era	labor market	affirmative action for Black people	Whether Black people should be given preferential treatment	4925	Adults	Adults	-0.16	0.0524	-3.0551	100	1	98	-0.294888	-0.303912	0.101535	-0.104904	-0.50292	0.0918	0.00918	-0.276903	-0.312874	Constructed hypothetical database from summary survey data. Database assumes 100 hypothetical candidates of equal quality are being rated as preferrable or not. Half are Black and half are White. The percent of White candidates rated as preferrable equals one minus the discrimination rate, which is the share who agree with affirmative action preferences for Black people. All Black candidates are …	Pew Research Center for the People & the Press Values Update Survey, Cornell University, Ithaca, NY: Roper Center for Public Opinion Research	0	self-reported discrimination	actual	(I am going to read you another series of statements on some different topics. For each statement, please tell me if you completely agree with it, mostly agree with it, mostly disagree with it, or completely disagree with it.)... We should make every possible effort to improve the position of blacks and other minorities, even if it means giving them preferential treatment.
2003	bad	21st century	labor market	affirmative action for Black people	Whether Black people should be given preferential treatment	12640	Adults	Adults	-0.14	0.0496	-2.8243	100	1	98	-0.27435	-0.281562	0.101535	-0.0825545	-0.48057	0.0929	0.00929	-0.256134	-0.292567	Constructed hypothetical database from summary survey data. Database assumes 100 hypothetical candidates of equal quality are being rated as preferrable or not. Half are Black and half are White. The percent of White candidates rated as preferrable equals one minus the discrimination rate, which is the share who agree with affirmative action preferences for Black people. All Black candidates are …	Pew Research Center for the People & the Press Values Update Survey, Cornell University, Ithaca, NY: Roper Center for Public Opinion Research	0	self-reported discrimination	actual	(Now I am going to read you another series on some different topics. For each statement, please tell me if you completely agree with it, mostly agree with it, mostly disagree with it or completely disagree with it.)...We should make every possible effort to improve the position of blacks and other minorities, even if it means giving them preferential treatment.
2006	bad	21st century	labor market	affirmative action for Black people	Whether Black people should be given preferential treatment	10035	Adults	Adults	-0.16	0.0524	-3.0551	100	1	98	-0.294888	-0.303912	0.101535	-0.104904	-0.50292	0.0918	0.00918	-0.276903	-0.312874	Constructed hypothetical database from summary survey data. Database assumes 100 hypothetical candidates of equal quality are being rated as preferrable or not. Half are Black and half are White. The percent of White candidates rated as preferrable equals one minus the discrimination rate, which is the share who agree with affirmative action preferences for Black people. All Black candidates are …	Pew Research Center for the People & the Press Values Update Survey, Cornell University, Ithaca, NY: Roper Center for Public Opinion Research	0	self-reported discrimination	actual	(Now I am going to read you another series of statements on some different topics. For each statement, please tell me if you completely agree with it, mostly agree with it, mostly disagree with it or completely disagree with it.)...We should make every possible effort to improve the position of blacks and other minorities, even if it means giving them preferential treatment.
2009	bad	21st century	labor market	affirmative action for Black people	Whether Black people should be given preferential treatment	15065	Adults	Adults	-0.16	0.0524	-3.0551	100	1	98	-0.294888	-0.303912	0.101535	-0.104904	-0.50292	0.0918	0.00918	-0.276903	-0.312874	Constructed hypothetical database from summary survey data. Database assumes 100 hypothetical candidates of equal quality are being rated as preferrable or not. Half are Black and half are White. The percent of White candidates rated as preferrable equals one minus the discrimination rate, which is the share who agree with affirmative action preferences for Black people. All Black candidates are …	Pew Research Center for the People & the Press Values Survey, Cornell University, Ithaca, NY: Roper Center for Public Opinion Research	0	self-reported discrimination	actual	(Now I am going to read you another series of statements on some different topics. For each statement, please tell me if you completely agree with it, mostly agree with it, mostly disagree with it or completely disagree with it.)...We should make every possible effort to improve the position of blacks and other minorities, even if it means giving them preferential treatment.
2012	bad	21st century	labor market	affirmative action for Black people	Whether Black people should be given preferential treatment	15040	Adults	Adults	-0.16	0.0524	-3.0551	100	1	98	-0.294888	-0.303912	0.102	-0.104904	-0.50292	0.0918	0.00918	-0.276903	-0.312874	Constructed hypothetical database from summary survey data. Database assumes 100 hypothetical candidates of equal quality are being rated as preferrable or not. Half are Black and half are White. The percent of White candidates rated as preferrable equals one minus the discrimination rate, which is the share who agree with affirmative action preferences for Black people. All Black candidates are …	Pew Research Center for the People & the Press Values Survey, Cornell University, Ithaca, NY: Roper Center for Public Opinion Research	0	self-reported discrimination	actual	(Here is another series of statements on some different topics.)...We should make every possible effort to improve the position of blacks and other minorities, even if it means giving them preferential treatment. Do you completely agree, mostly agree, mostly disagree, or completely disagree?
2013	bad	21st century	labor market	affirmative action for Black people	Whether Black people should be given preferential treatment	6650	Adults	Adults	-0.14	0.0496	-2.8243	100	1	98	-0.27435	-0.281562	0.101535	-0.0825545	-0.48057	0.0929	0.00929	-0.256134	-0.292567	Constructed hypothetical database from summary survey data. Database assumes 100 hypothetical candidates of equal quality are being rated as preferrable or not. Half are Black and half are White. The percent of White candidates rated as preferrable equals one minus the discrimination rate, which is the share who agree with affirmative action preferences for Black people. All Black candidates are …	Democracy Corps Poll, Cornell University, Ithaca, NY: Roper Center for Public Opinion Research	0	self-reported discrimination	actual	(Now I am going to read you a series of statements that will help us understand how you feel about a number of things. For each statement, please tell me if you agree or disagree with it.)...We should make every possible effort to improve the position of blacks and other minorities, even if it means giving them preferential treatment....(Would that be strongly agree/disagree or somewhat agree/dis…
1941	good	Jim Crow	labor market	candidate evaluation	Effect of Black race on whether job vacancy is available for application	282242	job vacancies	U.S. vacancies in defense industry	-0.51	0.0009919	-514.165	282242	1	282240	-0.695449	-0.858432	0.00188231	-0.854743	-0.862122	0.000972	1.83e-06	-0.695445	-0.695453	Data from text, converted into hypothetical database in which the outcome is acceptability of a job candidate in a population of applicants 10% black and 90% white (matching U.S. population in 1940). "During September 1941 the United States Employment Service inquired of selected defense industries throughout the country. Out of 282,245 prospective job openings, 144,583 or 51 per cent were absolu…	Granger, L. B. (1942). Barriers to Negro war employment. The Annals of the American Academy of Political and Social Science, 223(1), 72-80.	1	observed disparity	actual
1944	good	Jim Crow	labor market	candidate evaluation	Equality of hiring	2521	White adults	job applicants	-0.45	0.0017	-3.5	100	1	98	-0.333333	-0.346574	0.101535	-0.147566	-0.545581	0.0893	0.00893	-0.315823	-0.350843	Constructed hypothetical database from summary survey data. Database assumes 100 candidates are being rated as acceptable or not. Half are Black and half are White. The percent of Black candidates rated as acceptable equals one minus the discrimination rate. All White candidates are deemed acceptable, given the nature of the question. The model regresses candidate acceptability on Black race.	Citation: National Opinion Research Center (NORC). NORC Survey # 1944-0225: Attitudes Toward Negroes, Question 20. USNORC.440225.R15. National Opinion Research Center (NORC). Cornell University, Ithaca, NY: Roper Center for Public Opinion Research, 1944. Web. May-01-1944.	0	self-reported discrimination	actual	If a Negro is qualified to be a railroad engineer, do you think he should be given a chance at this job?
1944	good	Jim Crow	labor market	candidate evaluation	Black vs White hiring considerations	10084	White adults asked to consider hypothetical job candidate and whether Black candidates should be given as good a chance as White candidates	job applicants	-0.51	0.0018	-283.333	100000	1	99998	-0.667312	-0.805882	0.00316233	-0.799683	-0.81208	0.00175	5.55e-06	-0.667301	-0.667323	Constructed hypothetical database from summary survey data. Database assumes 100,000 job candidates are being rated as acceptable or not for a job. 10% are Black and 90% are White. The percent of Black candidates rated as acceptable equals one minus the discrimination rate (e.g 1 - 0.51 in 1944 or 49%). All White candidates are deemed acceptable, given the nature of the question. The model regres…	National Opinion Research Center (NORC). (1944). NORC Survey # 1944-0225: Attitudes Toward Negroes, Question 13 [USNORC.440225.R10]. National Opinion Research Center (NORC). Roper Center for Public Opinion Research.	0	self-reported discrimination	actual	do you think negroes should have as good a chance as white people to get any kind of job, or do you think white people should have the first chance at any kind of job?
1946	good	Jim Crow	labor market	candidate evaluation	Black vs White hiring considerations	10356	White adults asked to consider hypothetical job candidate and whether Black candidates should be given as good a chance as White candidates	job applicants	-0.23	0.0015	-153.333	100000	1	99998	-0.436302	-0.467654	0.00316233	-0.461456	-0.473852	0.00256	8.1e-06	-0.436286	-0.436318	Constructed hypothetical database from summary survey data. Database assumes 100,000 job candidates are being rated as acceptable or not for a job. 10% are Black and 90% are White. The percent of Black candidates rated as acceptable equals one minus the discrimination rate (e.g 1 - 0.51 in 1944 or 49%). All White candidates are deemed acceptable, given the nature of the question. The model regres…	National Opinion Research Center (NORC). (1946). NORC Survey: Minorities; United Nations, Question 2 [USNORC.460241.R02]. National Opinion Research Center (NORC). Roper Center for Public Opinion Research.	0	self-reported discrimination	actual	do you think negroes should have as good a chance as white people to get any kind of job, or do you think white people should have the first chance at any kind of job?
1947	good	Jim Crow	labor market	candidate evaluation	Black vs White hiring considerations	4590	White adults asked to consider hypothetical job candidate and whether Black candidates should be given as good a chance as White candidates	job applicants	-0.45	0.0018	-250	100000	1	99998	-0.620177	-0.725293	0.00316233	-0.719095	-0.731492	0.00195	6.15e-06	-0.620165	-0.62019	Constructed hypothetical database from summary survey data. Database assumes 100,000 job candidates are being rated as acceptable or not for a job. 10% are Black and 90% are White. The percent of Black candidates rated as acceptable equals one minus the discrimination rate (e.g 1 - 0.51 in 1944 or 49%). All White candidates are deemed acceptable, given the nature of the question. The model regres…	National Opinion Research Center (NORC). (1946). NORC Survey: Minorities; United Nations, Question 2 [USNORC.460241.R02]. National Opinion Research Center (NORC). Roper Center for Public Opinion Research.	0	self-reported discrimination	actual	do you think negroes around here should have as good a chance as white people to get every kind of job, or do you think white people should have a better chance?
1963	good	Jim Crow	labor market	candidate evaluation	Black vs White hiring considerations	4671	White adults asked to consider hypothetical job candidate and whether Black candidates should be given as good a chance as White candidates	job applicants	-0.15	0.0013	-115.385	100000	1	99998	-0.343	-0.357	0.00316233	-0.351037	-0.363433	0.00279	8.83e-06	-0.343	-0.343	Constructed hypothetical database from summary survey data. Database assumes 100,000 job candidates are being rated as acceptable or not for a job. 10% are Black and 90% are White. The percent of Black candidates rated as acceptable equals one minus the discrimination rate (e.g 1 - 0.51 in 1944 or 49%). All White candidates are deemed acceptable, given the nature of the question. The model regres…	National Opinion Research Center (NORC). (1963). NORC Amalgam Study # 330, Question 46 [USNORC.SRS330.QS09]. National Opinion Research Center (NORC). Roper Center for Public Opinion Research.	0	self-reported discrimination	actual	do you think negroes should have as good a chance as white people to get any kind of job, or do you think white people should have the first chance at any kind of job?
1966	good	Post-Civil Rights era	labor market	candidate evaluation	Black vs White hiring considerations	4578	White adults asked to consider hypothetical job candidate and whether Black candidates should be given as good a chance as White candidates	job applicants	-0.1	0.0011	-90.9091	100000	1	99998	-0.276292	-0.283663	0.00316233	-0.277465	-0.289861	0.00292	9.24e-06	-0.276274	-0.27631	Constructed hypothetical database from summary survey data. Database assumes 100,000 job candidates are being rated as acceptable or not for a job. 10% are Black and 90% are White. The percent of Black candidates rated as acceptable equals one minus the discrimination rate (e.g 1 - 0.51 in 1944 or 49%). All White candidates are deemed acceptable, given the nature of the question. The model regres…	National Opinion Research Center (NORC). (1966). NORC Amalgam Study # 889, Question 88 [USNORC.SRS889.R36]. National Opinion Research Center (NORC). Roper Center for Public Opinion Research.	0	self-reported discrimination	actual	do you think that negroes should have as good a chance as white people to get any kind of job, or do you think that white people should have the first chance at any kind of job?
1972	good	Post-Civil Rights era	labor market	candidate evaluation	Black vs White hiring considerations	4839	White adults asked to consider hypothetical job candidate and whether Black candidates should be given as good a chance as White candidates	job applicants	-0.03	0.0006	-50	100000	1	99998	-0.156175	-0.157464	0.00316233	-0.151266	-0.163662	0.00309	9.76e-06	-0.156156	-0.156194	Constructed hypothetical database from summary survey data. Database assumes 100,000 job candidates are being rated as acceptable or not for a job. 10% are Black and 90% are White. The percent of Black candidates rated as acceptable equals one minus the discrimination rate (e.g 1 - 0.51 in 1944 or 49%). All White candidates are deemed acceptable, given the nature of the question. The model regres…	NORC GSS, with funding from NSF and the Russell Sage Foundation. (1972). National Opinion Research Center General Social Survey 1972, Question 3962 [USNORC.GSS72.R40]. National Opinion Research Center [NORC]. Roper Center for Public Opinion Research.	0	self-reported discrimination	actual	do you think negroes should have as good a chance as white people to get any kind of job, or do you think white people should have the first chance at any kind of job?
1994-2004	good	21st century	labor market	compensation	Effect of race on NBA salary	15612	professional football players	employees	0.109	0.0208015	5.24	15612	19	15592	0.0419274	0.041952	0.0080041	0.0576401	0.026264	0.00799	6.39e-05	0.0420528	0.0418021	Data from Table 3, column 1	Doran, J., & Doran, D. R. (2004). Inequality in pay: A study of wage disparity in the NFL. Available at SSRN 628422.	1	model-adjusted	actual
2011-2017	good	21st century	labor market	compensation	Effect of race on NBA salary	766	professional basketball players	employees	-0.131	0.0639024	-2.05	797	30	766	-0.0738672	-0.0740019	0.0354887	-0.00444415	-0.14356	0.0353	0.00125	-0.0714198	-0.0763145	Data from Table 3, column 4	Johnson, C., & Minuci, E. (2020). Wage discrimination in the NBA: Evidence using free agent signings. Southern Economic Journal, 87(2), 517-539.	1	model-adjusted	actual
1944	good	Jim Crow	labor market	consumer discrimination	Approval of Black nurses	50420	White adults asked about approval	healthcare patients	-0.42	0.0017	-247.059	100000	1	99998	-0.615657	-0.717981	0.00316233	-0.711783	-0.724179	0.00196	6.21e-06	-0.615645	-0.615669	Constructed hypothetical database from summary survey data. Database assumes 100,000 candidates are being rated as acceptable or not. Of these 20% are Black and 80% White. The percent of Black candidates rated as acceptable equals one minus the discrimination rate. All White candidates are deemed acceptable. The model regresses candidate acceptability on Black race.	National Opinion Research Center (NORC)	0	self-reported discrimination	actual	if you were sick in a hospital, would it be all right with you if you had a negro nurse, or wouldn't you like it?
1968	good	Post-Civil Rights era	labor market	discriminatory advertisements	Stated or implied racial preference in job vacancy ads	1108	job vacancy ads	children	0	0	0	1108	2	1105	0	0	0.0300828	0.0589624	-0.0589624	0.0301	0.000903	0.00176975	-0.00176975	No anti-Black or anti-ethnic job advertisements in San Francisco and Salt Lake City from 1968-1972	Walsh, John et al. 1975. "Help Wanted: Case Studies of Classified Ads." Olympus Research Corp., Salt Lake City, Utah. Manpower Administration (Department of Labor, Washington, D.C).	0	observed disparity	actual
2019	good	21st century	labor market	financial planning	Effect of candidate race on hiring a financial planner	595	consumer evaluation of financial planners	financial planners	0.2	0.16	1.25	595	8	586	0.0515683	0.0516141	0.0410997	0.13217	-0.0289414	0.0409	0.00168	0.0548564	0.0482802	Data from Table 4.10 of dissertation version. Likelihood to hire a financial planner by race	Reiter, M., Seay, M., MacDonald, M., Lutter, S., & Loving, A. (2022). Are there racial and gender preferences when hiring a financial planner? An experimental design on diversity in financial planning. Journal of Financial Counseling and Planning, 33(3), 344-357.	1	audit	stereotypical names
2019	good	21st century	labor market	financial planning	Effect of candidate race on taking advice from a financial planner	595	consumer evaluation of financial planners	financial planners	0.02	0.33	0.0606061	595	8	586	0.0025036	0.00250361	0.0410997	0.0830591	-0.0780519	0.041	0.00168	0.0058	-0.000793	Data from Table 4.16 of dissertation version.	Reiter, M., Seay, M., MacDonald, M., Lutter, S., & Loving, A. (2022). Are there racial and gender preferences when hiring a financial planner? An experimental design on diversity in financial planning. Journal of Financial Counseling and Planning, 33(3), 344-357.	1	audit	stereotypical names
2019	good	21st century	labor market	financial planning	Effect of candidate race on trusting a financial planner	595	consumer evaluation of financial planners	financial planners	0.29	0.16	1.8125	595	8	586	0.0746647	0.0748039	0.0410997	0.155359	-0.0057516	0.0408	0.00167	0.0779432	0.0713862	Data from Table 4.19 of dissertation version	Reiter, M., Seay, M., MacDonald, M., Lutter, S., & Loving, A. (2022). Are there racial and gender preferences when hiring a financial planner? An experimental design on diversity in financial planning. Journal of Financial Counseling and Planning, 33(3), 344-357.	1	audit	stereotypical names
2020	good	21st century	labor market	health care access	Black vs White response rates to patient-initated request	1000	patient-therapist interactions	mentally ill adults	-0.0245	0.037	-0.662162	1000	3	997	-0.0209663	-0.0209693	0.0317	0.0411045	-0.0830432	0.0316	0.001	-0.0190062	-0.0229264	Table 5 column 1. Adjusted only for transgender status	Button, Patrick, Eva Dils, Benjamin Harrell, Luca Fumarco, and David Schwegman. Gender identity, race, and ethnicity discrimination in access to mental health care: Preliminary evidence from a multi-wave audit field experiment. Vol. 28164. National Bureau of Economic Research, 2020.	1	audit	stereotypical names		1
2020	good	21st century	labor market	health care access	Black vs White response rates to patient-initated request	1000	patient-therapist interactions	mentally ill adults	-0.1333	0.0404	-3.2995	1000	58	942	-0.106888	-0.107298	0.0316703	-0.0452239	-0.169372	0.0313	0.000989	-0.104949	-0.108826	Table 5 column 5. Adjusted for transgender status, mental health condition, state, week, day effects. Not enough power to have so many parameters	Button, Patrick, Eva Dils, Benjamin Harrell, Luca Fumarco, and David Schwegman. Gender identity, race, and ethnicity discrimination in access to mental health care: Preliminary evidence from a multi-wave audit field experiment. Vol. 28164. National Bureau of Economic Research, 2020.	1	audit	stereotypical names
2021	good	21st century	labor market	hiring discrimination--low-skilled jobs	Black vs White call back rates	41419	candidate-employer interactions	low-skilled job applicants	-0.0236439	0.0038788	-6.09563	41419	15	41259	-0.029996	-0.030005	0.00491378	-0.020374	-0.039636	0.00491	2.41e-05	-0.0299487	-0.0300433	Discrimination in callback probability for Black vs White respondents	Kline, Patrick, Evan K. Rose, and Christopher R. Walters. "Systemic discrimination among large US employers." The Quarterly Journal of Economics 137, no. 4 (2022): 1963-2036.	1	audit	stereotypical names
1944	good	Jim Crow	labor market	hiring policy	Approval of Black promotion	50420	White adults asked about approval	co-workers	-0.15	0.0013	-115.385	100000	1	99998	-0.342776	-0.357235	0.00316233	-0.351037	-0.363433	0.00279	8.83e-06	-0.342759	-0.342794	Constructed hypothetical database from summary survey data. Database assumes 100,000 candidates are being rated as acceptable or not. Of these 20% are Black and 80% White. The percent of Black candidates rated as acceptable equals one minus the discrimination rate. All White candidates are deemed acceptable. The model regresses candidate acceptability on Black race.	National Opinion Research Center (NORC)	0	self-reported discrimination	actual	if a negro with more training had a better job than you at the place where you worked, would it be all right with you, or wouldn't you like it?
1957	good	Jim Crow	labor market	hiring policy	Approval of racial integregation in workplace	2400	White adults asked about approval	co-workers	-0.17	0.0013	-130.769	100000	1	99998	-0.382146	-0.402571	0.00316233	-0.396373	-0.408769	0.0027	8.54e-06	-0.38213	-0.382163	Constructed hypothetical database from summary survey data. Database assumes 100,000 candidates are being rated as acceptable or not. Of these 20% are Black and 80% White. The percent of Black candidates rated as acceptable equals one minus the discrimination rate. All White candidates are deemed acceptable. The model regresses candidate acceptability on Black race.	Minneapolis Tribune	0	self-reported discrimination	actual	do you approve or disapprove of having white and negro people working together at the same jobs in offices, stores, or factories here in minnesota?
1965	bad	Post-Civil Rights era	labor market	hiring practices	Effect of race on career success, conditional on initital draft position	278	employees	professional athletes in National Football League	6.64731	2.8651	2.32009	278	1	276	0.138311	0.139203	0.0603023	0.257396	0.0210107	0.0589	0.00353	0.145239	0.131383	Coefficient on Black race in regression of career value "CarAV" (dependent variable) on draft position and draft position squared (independent variables); CarAV is an index of contribution to team wins relative to average player, given individual players statistics. These models were run separately for each year using the raw data provided by Niven. A positive value on Black race suggests the ave…	Niven, D. Stereotypes versus self-interest: race and the NFL draft. SN Soc Sci 2, 97 (2022). https://doi.org/10.1007/s43545-022-00401-z	1	model-adjusted	actual
1966	bad	Post-Civil Rights era	labor market	hiring practices	Effect of race on career success, conditional on initital draft position	305	employees	professional athletes in National Football League	0.791811	2.068	0.382888	305	1	303	0.021991	0.0219945	0.0575435	0.13478	-0.0907908	0.0573	0.00328	0.0284247	0.0155573	Coefficient on Black race in regression of career value "CarAV" (dependent variable) on draft position and draft position squared (independent variables); CarAV is an index of contribution to team wins relative to average player, given individual players statistics. These models were run separately for each year using the raw data provided by Niven. A positive value on Black race suggests the ave…	Niven, D. Stereotypes versus self-interest: race and the NFL draft. SN Soc Sci 2, 97 (2022). https://doi.org/10.1007/s43545-022-00401-z	1	model-adjusted	actual
1969	bad	Post-Civil Rights era	labor market	hiring practices	Effect of race on career success, conditional on initital draft position	487	employees	professional athletes in Major and Minor League Baseball	1.13697	1.21129	0.938647	487	1	485	0.0426	0.0426	0.0454545	0.1317	-0.046482	0.0453	0.00205	0.0466	0.0386	Coefficient on Black race in regression of variable "WAR" (dependent variable) on draft position and draft position squared (independent variables); WAR is an index of contribution to team wins relative to average player, given individual players statistics. These models were run separately for each year using the raw data provided by Niven. A positive value on Black race suggests the average Bla…	Niven, D. The racial disparity in the Major League Baseball draft, 1965–2001. SN Soc Sci 4, 14 (2024). https://doi.org/10.1007/s43545-023-00825-1	1	model-adjusted	actual
1969	bad	Post-Civil Rights era	labor market	hiring practices	Effect of race on career success, conditional on initital draft position	442	employees	professional athletes in National Football League	8.62588	2.16314	3.98767	442	1	440	0.18676	0.188978	0.0477274	0.282523	0.095432	0.046	0.00219	0.191044	0.182475	Coefficient on Black race in regression of career value "CarAV" (dependent variable) on draft position and draft position squared (independent variables); CarAV is an index of contribution to team wins relative to average player, given individual players statistics. These models were run separately for each year using the raw data provided by Niven. A positive value on Black race suggests the ave…	Niven, D. Stereotypes versus self-interest: race and the NFL draft. SN Soc Sci 2, 97 (2022). https://doi.org/10.1007/s43545-022-00401-z	1	model-adjusted	actual
1970	bad	Post-Civil Rights era	labor market	hiring practices	Effect of race on career success, conditional on initital draft position	480	employees	professional athletes in Major and Minor League Baseball	0.227929	0.922315	0.247127	480	1	478	0.0113026	0.0113031	0.0457869	0.101045	-0.0784392	0.0457	0.00209	0.0153897	0.00721552	Coefficient on Black race in regression of variable "WAR" (dependent variable) on draft position and draft position squared (independent variables); WAR is an index of contribution to team wins relative to average player, given individual players statistics. These models were run separately for each year using the raw data provided by Niven. A positive value on Black race suggests the average Bla…	Niven, D. The racial disparity in the Major League Baseball draft, 1965–2001. SN Soc Sci 4, 14 (2024). https://doi.org/10.1007/s43545-023-00825-1	1	model-adjusted	actual
1970	bad	Post-Civil Rights era	labor market	hiring practices	Effect of race on career success, conditional on initital draft position	441	employees	professional athletes in National Football League	4.2977	1.59594	2.69289	441	1	439	0.127476	0.128174	0.0477818	0.221826	0.0345211	0.0469	0.00223	0.131853	0.123099	Coefficient on Black race in regression of career value "CarAV" (dependent variable) on draft position and draft position squared (independent variables); CarAV is an index of contribution to team wins relative to average player, given individual players statistics. These models were run separately for each year using the raw data provided by Niven. A positive value on Black race suggests the ave…	Niven, D. Stereotypes versus self-interest: race and the NFL draft. SN Soc Sci 2, 97 (2022). https://doi.org/10.1007/s43545-022-00401-z	1	model-adjusted	actual
1971	bad	Post-Civil Rights era	labor market	hiring practices	Effect of race on job level at entry	1330	employees	employees	0.235424	0.123702	1.90316	1330	8	1321	0.0522913	0.052339	0.0274514	0.106144	-0.0014657	0.0274	0.00075	0.0537615	0.0508211	Results from Table 2, bottom panell. The weighted average of the coefficients and standard errors is calculated using the number of Black workers as the weight	Cassell, F. H., Director, S. M., & Doctors, S. I. (1975). Discrimination Within Internal Labor Markets. Industrial Relations, 14(3).	1	model-adjusted	actual
1971	bad	Post-Civil Rights era	labor market	hiring practices	Effect of race on career success, conditional on initital draft position	441	employees	professional athletes in Major and Minor League Baseball	1.21417	1.42368	0.85284	441	1	439	0.0406702	0.0406926	0.0477818	0.134345	-0.0529598	0.0476	0.00227	0.0451123	0.036228	Coefficient on Black race in regression of variable "WAR" (dependent variable) on draft position and draft position squared (independent variables); WAR is an index of contribution to team wins relative to average player, given individual players statistics. These models were run separately for each year using the raw data provided by Niven. A positive value on Black race suggests the average Bla…	Niven, D. The racial disparity in the Major League Baseball draft, 1965–2001. SN Soc Sci 4, 14 (2024). https://doi.org/10.1007/s43545-023-00825-1	1	model-adjusted	actual
1971	bad	Post-Civil Rights era	labor market	hiring practices	Effect of race on career success, conditional on initital draft position	442	employees	professional athletes in National Football League	2.51198	2.05988	1.21948	442	1	440	0.0580383	0.0581036	0.0477274	0.151649	-0.0354421	0.0475	0.00226	0.0624627	0.0536138	Coefficient on Black race in regression of career value "CarAV" (dependent variable) on draft position and draft position squared (independent variables); CarAV is an index of contribution to team wins relative to average player, given individual players statistics. These models were run separately for each year using the raw data provided by Niven. A positive value on Black race suggests the ave…	Niven, D. Stereotypes versus self-interest: race and the NFL draft. SN Soc Sci 2, 97 (2022). https://doi.org/10.1007/s43545-022-00401-z	1	model-adjusted	actual
1975	bad	Post-Civil Rights era	labor market	hiring practices	Effect of race on career success, conditional on initital draft position	404	employees	professional athletes in Major and Minor League Baseball	2.77959	0.890573	3.12113	404	1	402	0.153815	0.155046	0.0499376	0.252924	0.0571681	0.0486	0.00242	0.158558	0.149073	Coefficient on Black race in regression of variable "WAR" (dependent variable) on draft position and draft position squared (independent variables); WAR is an index of contribution to team wins relative to average player, given individual players statistics. These models were run separately for each year using the raw data provided by Niven. A positive value on Black race suggests the average Bla…	Niven, D. The racial disparity in the Major League Baseball draft, 1965–2001. SN Soc Sci 4, 14 (2024). https://doi.org/10.1007/s43545-023-00825-1	1	model-adjusted	actual
1975	bad	Post-Civil Rights era	labor market	hiring practices	Effect of race on career success, conditional on initital draft position	437	employees	professional athletes in National Football League	7.64799	1.89095	4.04451	437	1	435	0.190373	0.192724	0.0480015	0.286807	0.0986414	0.0462	0.00221	0.194701	0.186046	Coefficient on Black race in regression of career value "CarAV" (dependent variable) on draft position and draft position squared (independent variables); CarAV is an index of contribution to team wins relative to average player, given individual players statistics. These models were run separately for each year using the raw data provided by Niven. A positive value on Black race suggests the ave…	Niven, D. Stereotypes versus self-interest: race and the NFL draft. SN Soc Sci 2, 97 (2022). https://doi.org/10.1007/s43545-022-00401-z	1	model-adjusted	actual
1976	bad	Post-Civil Rights era	labor market	hiring practices	Effect of race on career success, conditional on initital draft position	487	employees	professional athletes in National Football League	4.45027	1.69356	2.62776	487	1	485	0.11848	0.119039	0.0454545	0.20813	0.0299484	0.0447	0.00203	0.122452	0.114508	Coefficient on Black race in regression of career value "CarAV" (dependent variable) on draft position and draft position squared (independent variables); CarAV is an index of contribution to team wins relative to average player, given individual players statistics. These models were run separately for each year using the raw data provided by Niven. A positive value on Black race suggests the ave…	Niven, D. Stereotypes versus self-interest: race and the NFL draft. SN Soc Sci 2, 97 (2022). https://doi.org/10.1007/s43545-022-00401-z	1	model-adjusted	actual
1979	bad	Post-Civil Rights era	labor market	hiring practices	Effect of race on career success, conditional on initital draft position	479	employees	professional athletes in Major and Minor League Baseball	0.210752	0.947697	0.222384	479	1	477	0.0101817	0.0101821	0.0458349	0.100019	-0.0796544	0.0457	0.00209	0.0142774	0.00608601	Coefficient on Black race in regression of variable "WAR" (dependent variable) on draft position and draft position squared (independent variables); WAR is an index of contribution to team wins relative to average player, given individual players statistics. These models were run separately for each year using the raw data provided by Niven. A positive value on Black race suggests the average Bla…	Niven, D. The racial disparity in the Major League Baseball draft, 1965–2001. SN Soc Sci 4, 14 (2024). https://doi.org/10.1007/s43545-023-00825-1	1	model-adjusted	actual
1979	bad	Post-Civil Rights era	labor market	hiring practices	Effect of race on career success, conditional on initital draft position	329	employees	professional athletes in National Football League	2.7903	2.27101	1.22866	329	1	327	0.0677887	0.0678928	0.0553849	0.176447	-0.0406616	0.055	0.00303	0.0737278	0.0618496	Coefficient on Black race in regression of career value "CarAV" (dependent variable) on draft position and draft position squared (independent variables); CarAV is an index of contribution to team wins relative to average player, given individual players statistics. These models were run separately for each year using the raw data provided by Niven. A positive value on Black race suggests the ave…	Niven, D. Stereotypes versus self-interest: race and the NFL draft. SN Soc Sci 2, 97 (2022). https://doi.org/10.1007/s43545-022-00401-z	1	model-adjusted	actual
1980	bad	Post-Civil Rights era	labor market	hiring practices	Effect of race on career success, conditional on initital draft position	473	employees	professional athletes in Major and Minor League Baseball	1.24126	0.550852	2.25335	473	1	471	0.103274	0.103643	0.0461266	0.194051	0.0132351	0.0455	0.00209	0.107378	0.0991697	Coefficient on Black race in regression of variable "WAR" (dependent variable) on draft position and draft position squared (independent variables); WAR is an index of contribution to team wins relative to average player, given individual players statistics. These models were run separately for each year using the raw data provided by Niven. A positive value on Black race suggests the average Bla…	Niven, D. The racial disparity in the Major League Baseball draft, 1965–2001. SN Soc Sci 4, 14 (2024). https://doi.org/10.1007/s43545-023-00825-1	1	model-adjusted	actual
1981	bad	Post-Civil Rights era	labor market	hiring practices	Effect of race on career success, conditional on initital draft position	470	employees	professional athletes in Major and Minor League Baseball	3.74383	1.55178	2.4126	470	1	468	0.110835	0.111292	0.0462745	0.20199	0.0205945	0.0456	0.0021	0.115	0.107	Coefficient on Black race in regression of variable "WAR" (dependent variable) on draft position and draft position squared (independent variables); WAR is an index of contribution to team wins relative to average player, given individual players statistics. These models were run separately for each year using the raw data provided by Niven. A positive value on Black race suggests the average Bla…	Niven, D. The racial disparity in the Major League Baseball draft, 1965–2001. SN Soc Sci 4, 14 (2024). https://doi.org/10.1007/s43545-023-00825-1	1	model-adjusted	actual
1981	bad	Post-Civil Rights era	labor market	hiring practices	Effect of race on career success, conditional on initital draft position	330	employees	professional athletes in National Football League	8.35069	2.40999	3.46503	330	1	328	0.187916	0.190176	0.0553001	0.298564	0.0817878	0.0532	0.00293	0.193654	0.182178	Coefficient on Black race in regression of career value "CarAV" (dependent variable) on draft position and draft position squared (independent variables); CarAV is an index of contribution to team wins relative to average player, given individual players statistics. These models were run separately for each year using the raw data provided by Niven. A positive value on Black race suggests the ave…	Niven, D. Stereotypes versus self-interest: race and the NFL draft. SN Soc Sci 2, 97 (2022). https://doi.org/10.1007/s43545-022-00401-z	1	model-adjusted	actual
1985	bad	Post-Civil Rights era	labor market	hiring practices	Effect of race on career success, conditional on initital draft position	465	employees	professional athletes in Major and Minor League Baseball	4.29228	1.40478	3.05549	465	1	463	0.14059	0.141528	0.0465242	0.232715	0.0503402	0.0455	0.00211	0.145	0.136	Coefficient on Black race in regression of variable "WAR" (dependent variable) on draft position and draft position squared (independent variables); WAR is an index of contribution to team wins relative to average player, given individual players statistics. These models were run separately for each year using the raw data provided by Niven. A positive value on Black race suggests the average Bla…	Niven, D. The racial disparity in the Major League Baseball draft, 1965–2001. SN Soc Sci 4, 14 (2024). https://doi.org/10.1007/s43545-023-00825-1	1	model-adjusted	actual
1985	bad	Post-Civil Rights era	labor market	hiring practices	Effect of race on career success, conditional on initital draft position	333	employees	professional athletes in National Football League	4.47984	2.54165	1.76257	333	1	331	0.096428	0.0967286	0.0550482	0.204623	-0.0111659	0.0544	0.00298	0.102268	0.0905881	Coefficient on Black race in regression of career value "CarAV" (dependent variable) on draft position and draft position squared (independent variables); CarAV is an index of contribution to team wins relative to average player, given individual players statistics. These models were run separately for each year using the raw data provided by Niven. A positive value on Black race suggests the ave…	Niven, D. Stereotypes versus self-interest: race and the NFL draft. SN Soc Sci 2, 97 (2022). https://doi.org/10.1007/s43545-022-00401-z	1	model-adjusted	actual
1989	bad	Post-Civil Rights era	labor market	hiring practices	Effect of race on career success, conditional on initital draft position	596	employees	professional athletes in Major and Minor League Baseball	-0.492843	0.748463	-0.658473	596	1	594	-0.0270076	-0.0270142	0.0410651	0.0534734	-0.107502	0.041	0.00168	-0.0237187	-0.0302966	Coefficient on Black race in regression of variable "WAR" (dependent variable) on draft position and draft position squared (independent variables); WAR is an index of contribution to team wins relative to average player, given individual players statistics. These models were run separately for each year using the raw data provided by Niven. A positive value on Black race suggests the average Bla…	Niven, D. The racial disparity in the Major League Baseball draft, 1965–2001. SN Soc Sci 4, 14 (2024). https://doi.org/10.1007/s43545-023-00825-1	1	model-adjusted	actual
1989	bad	Post-Civil Rights era	labor market	hiring practices	Effect of race on career success, conditional on initital draft position	334	employees	professional athletes in National Football League	2.63425	2.36132	1.11558	334	1	332	0.0611112	0.0611874	0.054965	0.168919	-0.0465439	0.0546	0.00299	0.0669663	0.055256	Coefficient on Black race in regression of career value "CarAV" (dependent variable) on draft position and draft position squared (independent variables); CarAV is an index of contribution to team wins relative to average player, given individual players statistics. These models were run separately for each year using the raw data provided by Niven. A positive value on Black race suggests the ave…	Niven, D. Stereotypes versus self-interest: race and the NFL draft. SN Soc Sci 2, 97 (2022). https://doi.org/10.1007/s43545-022-00401-z	1	model-adjusted	actual
1990	bad	Post-Civil Rights era	labor market	hiring practices	Effect of race on career success, conditional on initital draft position	330	employees	professional athletes in National Football League	2.2353	2.71678	0.822778	330	1	328	0.0453835	0.0454147	0.0553001	0.153803	-0.0629736	0.055	0.00303	0.0513197	0.0394473	Coefficient on Black race in regression of career value "CarAV" (dependent variable) on draft position and draft position squared (independent variables); CarAV is an index of contribution to team wins relative to average player, given individual players statistics. These models were run separately for each year using the raw data provided by Niven. A positive value on Black race suggests the ave…	Niven, D. Stereotypes versus self-interest: race and the NFL draft. SN Soc Sci 2, 97 (2022). https://doi.org/10.1007/s43545-022-00401-z	1	model-adjusted	actual
1991	bad	Post-Civil Rights era	labor market	hiring practices	Effect of race on career success, conditional on initital draft position	616	employees	professional athletes in Major and Minor League Baseball	0.219874	0.513304	0.428351	616	1	614	0.0172843	0.017286	0.0403896	0.0964496	-0.0618777	0.0403	0.00162	0.0204677	0.0141008	Coefficient on Black race in regression of variable "WAR" (dependent variable) on draft position and draft position squared (independent variables); WAR is an index of contribution to team wins relative to average player, given individual players statistics. These models were run separately for each year using the raw data provided by Niven. A positive value on Black race suggests the average Bla…	Niven, D. The racial disparity in the Major League Baseball draft, 1965–2001. SN Soc Sci 4, 14 (2024). https://doi.org/10.1007/s43545-023-00825-1	1	model-adjusted	actual
1991	bad	Post-Civil Rights era	labor market	hiring practices	Effect of race on career success, conditional on initital draft position	329	employees	professional athletes in National Football League	6.09194	2.64117	2.30653	329	1	327	0.126526	0.127208	0.0553849	0.235762	0.0186537	0.0543	0.003	0.132397	0.120655	Coefficient on Black race in regression of career value "CarAV" (dependent variable) on draft position and draft position squared (independent variables); CarAV is an index of contribution to team wins relative to average player, given individual players statistics. These models were run separately for each year using the raw data provided by Niven. A positive value on Black race suggests the ave…	Niven, D. Stereotypes versus self-interest: race and the NFL draft. SN Soc Sci 2, 97 (2022). https://doi.org/10.1007/s43545-022-00401-z	1	model-adjusted	actual
1995	bad	Post-Civil Rights era	labor market	hiring practices	Effect of race on career success, conditional on initital draft position	625	employees	professional athletes in Major and Minor League Baseball	-0.683354	0.662149	-1.03202	625	1	623	-0.0413119	-0.0413354	0.0400963	0.0372534	-0.119924	0.04	0.0016	-0.0381787	-0.044445	Coefficient on Black race in regression of variable "WAR" (dependent variable) on draft position and draft position squared (independent variables); WAR is an index of contribution to team wins relative to average player, given individual players statistics. These models were run separately for each year using the raw data provided by Niven. A positive value on Black race suggests the average Bla…	Niven, D. The racial disparity in the Major League Baseball draft, 1965–2001. SN Soc Sci 4, 14 (2024). https://doi.org/10.1007/s43545-023-00825-1	1	model-adjusted	actual
1995	bad	Post-Civil Rights era	labor market	hiring practices	Effect of race on career success, conditional on initital draft position	246	employees	professional athletes in National Football League	-1.0656	3.06067	-0.348157	246	1	244	-0.022283	-0.0222866	0.06415	0.103447	-0.148021	0.0639	0.00407	-0.0143032	-0.0302627	Coefficient on Black race in regression of career value "CarAV" (dependent variable) on draft position and draft position squared (independent variables); CarAV is an index of contribution to team wins relative to average player, given individual players statistics. These models were run separately for each year using the raw data provided by Niven. A positive value on Black race suggests the ave…	Niven, D. Stereotypes versus self-interest: race and the NFL draft. SN Soc Sci 2, 97 (2022). https://doi.org/10.1007/s43545-022-00401-z	1	model-adjusted	actual
1996	bad	Post-Civil Rights era	labor market	hiring practices	Effect of race on career success, conditional on initital draft position	251	employees	professional athletes in National Football League	2.40621	3.92052	0.613748	251	1	249	0.0388653	0.0388849	0.0635001	0.163345	-0.0855752	0.0632	0.00399	0.0466779	0.0310528	Coefficient on Black race in regression of career value "CarAV" (dependent variable) on draft position and draft position squared (independent variables); CarAV is an index of contribution to team wins relative to average player, given individual players statistics. These models were run separately for each year using the raw data provided by Niven. A positive value on Black race suggests the ave…	Niven, D. Stereotypes versus self-interest: race and the NFL draft. SN Soc Sci 2, 97 (2022). https://doi.org/10.1007/s43545-022-00401-z	1	model-adjusted	actual
1999	bad	Post-Civil Rights era	labor market	hiring practices	Effect of race on career success, conditional on initital draft position	653	employees	professional athletes in Major and Minor League Baseball	1.46532	0.620044	2.36325	653	1	651	0.0922281	0.092491	0.0392232	0.169368	0.0156134	0.0388	0.00152	0.0952064	0.0892498	Coefficient on Black race in regression of variable "WAR" (dependent variable) on draft position and draft position squared (independent variables); WAR is an index of contribution to team wins relative to average player, given individual players statistics. These models were run separately for each year using the raw data provided by Niven. A positive value on Black race suggests the average Bla…	Niven, D. The racial disparity in the Major League Baseball draft, 1965–2001. SN Soc Sci 4, 14 (2024). https://doi.org/10.1007/s43545-023-00825-1	1	model-adjusted	actual
1999	bad	Post-Civil Rights era	labor market	hiring practices	Effect of race on career success, conditional on initital draft position	249	employees	professional athletes in National Football League	6.52414	3.0691	2.12575	249	1	247	0.134038	0.134849	0.0637577	0.259814	0.00988398	0.0624	0.00395	0.141783	0.126292	Coefficient on Black race in regression of career value "CarAV" (dependent variable) on draft position and draft position squared (independent variables); CarAV is an index of contribution to team wins relative to average player, given individual players statistics. These models were run separately for each year using the raw data provided by Niven. A positive value on Black race suggests the ave…	Niven, D. Stereotypes versus self-interest: race and the NFL draft. SN Soc Sci 2, 97 (2022). https://doi.org/10.1007/s43545-022-00401-z	1	model-adjusted	actual
2000	bad	21st century	labor market	hiring practices	Effect of race on career success, conditional on initital draft position	624	employees	professional athletes in Major and Minor League Baseball	-0.454149	0.683569	-0.66438	624	1	622	-0.0266298	-0.0266361	0.0401286	0.052016	-0.105288	0.04	0.0016	-0.0235	-0.0298	Coefficient on Black race in regression of variable "WAR" (dependent variable) on draft position and draft position squared (independent variables); WAR is an index of contribution to team wins relative to average player, given individual players statistics. These models were run separately for each year using the raw data provided by Niven. A positive value on Black race suggests the average Bla…	Niven, D. The racial disparity in the Major League Baseball draft, 1965–2001. SN Soc Sci 4, 14 (2024). https://doi.org/10.1007/s43545-023-00825-1	1	model-adjusted	actual
2000	bad	21st century	labor market	hiring practices	Effect of race on career success, conditional on initital draft position	251	employees	professional athletes in National Football League	-2.78566	3.3548	-0.830352	251	1	249	-0.0525487	-0.0525972	0.0635001	0.0718629	-0.177057	0.0631	0.00398	-0.044746	-0.0603515	Coefficient on Black race in regression of career value "CarAV" (dependent variable) on draft position and draft position squared (independent variables); CarAV is an index of contribution to team wins relative to average player, given individual players statistics. These models were run separately for each year using the raw data provided by Niven. A positive value on Black race suggests the ave…	Niven, D. Stereotypes versus self-interest: race and the NFL draft. SN Soc Sci 2, 97 (2022). https://doi.org/10.1007/s43545-022-00401-z	1	model-adjusted	actual
2001	bad	21st century	labor market	hiring practices	Effect of race on career success, conditional on initital draft position	766	employees	professional athletes in Major and Minor League Baseball	-0.237295	0.58614	-0.404844	766	1	764	-0.0146452	-0.0146462	0.0362024	0.0563105	-0.085603	0.0361	0.00131	-0.0120853	-0.017205	Coefficient on Black race in regression of variable "WAR" (dependent variable) on draft position and draft position squared (independent variables); WAR is an index of contribution to team wins relative to average player, given individual players statistics. These models were run separately for each year using the raw data provided by Niven. A positive value on Black race suggests the average Bla…	Niven, D. The racial disparity in the Major League Baseball draft, 1965–2001. SN Soc Sci 4, 14 (2024). https://doi.org/10.1007/s43545-023-00825-1	1	model-adjusted	actual
2001	bad	21st century	labor market	hiring practices	Effect of race on career success, conditional on initital draft position	241	employees	professional athletes in National Football League	-1.08269	3.42808	-0.315831	241	1	239	-0.0204252	-0.020428	0.0648204	0.10662	-0.147476	0.0645228	0.00416	-0.0123	-0.0286	Coefficient on Black race in regression of career value "CarAV" (dependent variable) on draft position and draft position squared (independent variables); CarAV is an index of contribution to team wins relative to average player, given individual players statistics. These models were run separately for each year using the raw data provided by Niven. A positive value on Black race suggests the ave…	Niven, D. Stereotypes versus self-interest: race and the NFL draft. SN Soc Sci 2, 97 (2022). https://doi.org/10.1007/s43545-022-00401-z	1	model-adjusted	actual
1911	good	Jim Crow	labor market	law career	whether the American Bar Association would admit Black people	30000	Discriminatory policy excludes Black members from American Bar Association	lawyers	-0.994	0.0006056	-1634.88	30000	1	29998	-0.994435	-2.94082	0.00577379	-2.92951	-2.95214	6.41e-05	3.7e-07	-0.994434	-0.994436	Assumes 1 Black member deemed acceptable out of 30,000 possible candidates, 10% of which are Black.	White Jr, Walter. 2015. "Tracing the Roots of the Civil Rights and Social Justice Section" Human Rights Magazine Vol. 41, No. 3 - 50th Anniversary Issue, available https://www.americanbar.org/groups/crsj/publications/human_rights_magazine_home/2015-vol-41/vol-41--no-3-50th-anniversary-issue/tracing-the-roots-of-the-civil-rights-and-social-justice-section/ AND https://www.americanbar.org/about_the…	0	policy	actual
1912	good	Jim Crow	labor market	law career	whether the American Bar Association would admit Black people	30000	Discriminatory policy excludes Black members from American Bar Association	lawyers	-0.994	0.0006056	-1634.88	30000	1	29998	-0.994435	-2.94082	0.00577379	-2.92951	-2.95214	6.41e-05	3.7e-07	-0.994434	-0.994436	Assumes 1 Black member deemed acceptable out of 30,000 possible candidates, 10% of which are Black.	White Jr, Walter. 2015. "Tracing the Roots of the Civil Rights and Social Justice Section" Human Rights Magazine Vol. 41, No. 3 - 50th Anniversary Issue, available https://www.americanbar.org/groups/crsj/publications/human_rights_magazine_home/2015-vol-41/vol-41--no-3-50th-anniversary-issue/tracing-the-roots-of-the-civil-rights-and-social-justice-section/ AND https://www.americanbar.org/about_the…	0	policy	actual
1913	good	Jim Crow	labor market	law career	whether the American Bar Association would admit Black people	30000	Discriminatory policy excludes Black members from American Bar Association	lawyers	-0.994	0.0006056	-1634.88	30000	1	29998	-0.994435	-2.94082	0.00577379	-2.92951	-2.95214	6.41e-05	3.7e-07	-0.994434	-0.994436	Assumes 1 Black member deemed acceptable out of 30,000 possible candidates, 10% of which are Black.	White Jr, Walter. 2015. "Tracing the Roots of the Civil Rights and Social Justice Section" Human Rights Magazine Vol. 41, No. 3 - 50th Anniversary Issue, available https://www.americanbar.org/groups/crsj/publications/human_rights_magazine_home/2015-vol-41/vol-41--no-3-50th-anniversary-issue/tracing-the-roots-of-the-civil-rights-and-social-justice-section/ AND https://www.americanbar.org/about_the…	0	policy	actual
1914	good	Jim Crow	labor market	law career	whether the American Bar Association would admit Black people	30000	Discriminatory policy excludes Black members from American Bar Association	lawyers	-0.994	0.0006056	-1634.88	30000	1	29998	-0.994435	-2.94082	0.00577379	-2.92951	-2.95214	6.41e-05	3.7e-07	-0.994434	-0.994436	Assumes 1 Black member deemed acceptable out of 30,000 possible candidates, 10% of which are Black.	White Jr, Walter. 2015. "Tracing the Roots of the Civil Rights and Social Justice Section" Human Rights Magazine Vol. 41, No. 3 - 50th Anniversary Issue, available https://www.americanbar.org/groups/crsj/publications/human_rights_magazine_home/2015-vol-41/vol-41--no-3-50th-anniversary-issue/tracing-the-roots-of-the-civil-rights-and-social-justice-section/ AND https://www.americanbar.org/about_the…	0	policy	actual
1915	good	Jim Crow	labor market	law career	whether the American Bar Association would admit Black people	30000	Discriminatory policy excludes Black members from American Bar Association	lawyers	-0.994	0.0006056	-1634.88	30000	1	29998	-0.994435	-2.94082	0.00577379	-2.92951	-2.95214	6.41e-05	3.7e-07	-0.994434	-0.994436	Assumes 1 Black member deemed acceptable out of 30,000 possible candidates, 10% of which are Black.	White Jr, Walter. 2015. "Tracing the Roots of the Civil Rights and Social Justice Section" Human Rights Magazine Vol. 41, No. 3 - 50th Anniversary Issue, available https://www.americanbar.org/groups/crsj/publications/human_rights_magazine_home/2015-vol-41/vol-41--no-3-50th-anniversary-issue/tracing-the-roots-of-the-civil-rights-and-social-justice-section/ AND https://www.americanbar.org/about_the…	0	policy	actual
1916	good	Jim Crow	labor market	law career	whether the American Bar Association would admit Black people	30000	Discriminatory policy excludes Black members from American Bar Association	lawyers	-0.994	0.0006056	-1634.88	30000	1	29998	-0.994435	-2.94082	0.00577379	-2.92951	-2.95214	6.41e-05	3.7e-07	-0.994434	-0.994436	Assumes 1 Black member deemed acceptable out of 30,000 possible candidates, 10% of which are Black.	White Jr, Walter. 2015. "Tracing the Roots of the Civil Rights and Social Justice Section" Human Rights Magazine Vol. 41, No. 3 - 50th Anniversary Issue, available https://www.americanbar.org/groups/crsj/publications/human_rights_magazine_home/2015-vol-41/vol-41--no-3-50th-anniversary-issue/tracing-the-roots-of-the-civil-rights-and-social-justice-section/ AND https://www.americanbar.org/about_the…	0	policy	actual
1917	good	Jim Crow	labor market	law career	whether the American Bar Association would admit Black people	30000	Discriminatory policy excludes Black members from American Bar Association	lawyers	-0.994	0.0006056	-1634.88	30000	1	29998	-0.994435	-2.94082	0.00577379	-2.92951	-2.95214	6.41e-05	3.7e-07	-0.994434	-0.994436	Assumes 1 Black member deemed acceptable out of 30,000 possible candidates, 10% of which are Black.	White Jr, Walter. 2015. "Tracing the Roots of the Civil Rights and Social Justice Section" Human Rights Magazine Vol. 41, No. 3 - 50th Anniversary Issue, available https://www.americanbar.org/groups/crsj/publications/human_rights_magazine_home/2015-vol-41/vol-41--no-3-50th-anniversary-issue/tracing-the-roots-of-the-civil-rights-and-social-justice-section/ AND https://www.americanbar.org/about_the…	0	policy	actual
1918	good	Jim Crow	labor market	law career	whether the American Bar Association would admit Black people	30000	Discriminatory policy excludes Black members from American Bar Association	lawyers	-0.994	0.0006056	-1634.88	30000	1	29998	-0.994435	-2.94082	0.00577379	-2.92951	-2.95214	6.41e-05	3.7e-07	-0.994434	-0.994436	Assumes 1 Black member deemed acceptable out of 30,000 possible candidates, 10% of which are Black.	White Jr, Walter. 2015. "Tracing the Roots of the Civil Rights and Social Justice Section" Human Rights Magazine Vol. 41, No. 3 - 50th Anniversary Issue, available https://www.americanbar.org/groups/crsj/publications/human_rights_magazine_home/2015-vol-41/vol-41--no-3-50th-anniversary-issue/tracing-the-roots-of-the-civil-rights-and-social-justice-section/ AND https://www.americanbar.org/about_the…	0	policy	actual
1919	good	Jim Crow	labor market	law career	whether the American Bar Association would admit Black people	30000	Discriminatory policy excludes Black members from American Bar Association	lawyers	-0.994	0.0006056	-1634.88	30000	1	29998	-0.994435	-2.94082	0.00577379	-2.92951	-2.95214	6.41e-05	3.7e-07	-0.994434	-0.994436	Assumes 1 Black member deemed acceptable out of 30,000 possible candidates, 10% of which are Black.	White Jr, Walter. 2015. "Tracing the Roots of the Civil Rights and Social Justice Section" Human Rights Magazine Vol. 41, No. 3 - 50th Anniversary Issue, available https://www.americanbar.org/groups/crsj/publications/human_rights_magazine_home/2015-vol-41/vol-41--no-3-50th-anniversary-issue/tracing-the-roots-of-the-civil-rights-and-social-justice-section/ AND https://www.americanbar.org/about_the…	0	policy	actual
1920	good	Jim Crow	labor market	law career	whether the American Bar Association would admit Black people	30000	Discriminatory policy excludes Black members from American Bar Association	lawyers	-0.994	0.0006056	-1634.88	30000	1	29998	-0.994435	-2.94082	0.00577379	-2.92951	-2.95214	6.41e-05	3.7e-07	-0.994434	-0.994436	Assumes 1 Black member deemed acceptable out of 30,000 possible candidates, 10% of which are Black.	White Jr, Walter. 2015. "Tracing the Roots of the Civil Rights and Social Justice Section" Human Rights Magazine Vol. 41, No. 3 - 50th Anniversary Issue, available https://www.americanbar.org/groups/crsj/publications/human_rights_magazine_home/2015-vol-41/vol-41--no-3-50th-anniversary-issue/tracing-the-roots-of-the-civil-rights-and-social-justice-section/ AND https://www.americanbar.org/about_the…	0	policy	actual
1921	good	Jim Crow	labor market	law career	whether the American Bar Association would admit Black people	30000	Discriminatory policy excludes Black members from American Bar Association	lawyers	-0.994	0.0006056	-1634.88	30000	1	29998	-0.994435	-2.94082	0.00577379	-2.92951	-2.95214	6.41e-05	3.7e-07	-0.994434	-0.994436	Assumes 1 Black member deemed acceptable out of 30,000 possible candidates, 10% of which are Black.	White Jr, Walter. 2015. "Tracing the Roots of the Civil Rights and Social Justice Section" Human Rights Magazine Vol. 41, No. 3 - 50th Anniversary Issue, available https://www.americanbar.org/groups/crsj/publications/human_rights_magazine_home/2015-vol-41/vol-41--no-3-50th-anniversary-issue/tracing-the-roots-of-the-civil-rights-and-social-justice-section/ AND https://www.americanbar.org/about_the…	0	policy	actual
1922	good	Jim Crow	labor market	law career	whether the American Bar Association would admit Black people	30000	Discriminatory policy excludes Black members from American Bar Association	lawyers	-0.994	0.0006056	-1634.88	30000	1	29998	-0.994435	-2.94082	0.00577379	-2.92951	-2.95214	6.41e-05	3.7e-07	-0.994434	-0.994436	Assumes 1 Black member deemed acceptable out of 30,000 possible candidates, 10% of which are Black.	White Jr, Walter. 2015. "Tracing the Roots of the Civil Rights and Social Justice Section" Human Rights Magazine Vol. 41, No. 3 - 50th Anniversary Issue, available https://www.americanbar.org/groups/crsj/publications/human_rights_magazine_home/2015-vol-41/vol-41--no-3-50th-anniversary-issue/tracing-the-roots-of-the-civil-rights-and-social-justice-section/ AND https://www.americanbar.org/about_the…	0	policy	actual
1923	good	Jim Crow	labor market	law career	whether the American Bar Association would admit Black people	30000	Discriminatory policy excludes Black members from American Bar Association	lawyers	-0.994	0.0006056	-1634.88	30000	1	29998	-0.994435	-2.94082	0.00577379	-2.92951	-2.95214	6.41e-05	3.7e-07	-0.994434	-0.994436	Assumes 1 Black member deemed acceptable out of 30,000 possible candidates, 10% of which are Black.	White Jr, Walter. 2015. "Tracing the Roots of the Civil Rights and Social Justice Section" Human Rights Magazine Vol. 41, No. 3 - 50th Anniversary Issue, available https://www.americanbar.org/groups/crsj/publications/human_rights_magazine_home/2015-vol-41/vol-41--no-3-50th-anniversary-issue/tracing-the-roots-of-the-civil-rights-and-social-justice-section/ AND https://www.americanbar.org/about_the…	0	policy	actual
1924	good	Jim Crow	labor market	law career	whether the American Bar Association would admit Black people	30000	Discriminatory policy excludes Black members from American Bar Association	lawyers	-0.994	0.0006056	-1634.88	30000	1	29998	-0.994435	-2.94082	0.00577	-2.92951	-2.95214	6.41e-05	3.7e-07	-0.994434	-0.994436	Assumes 1 Black member deemed acceptable out of 30,000 possible candidates, 10% of which are Black.	White Jr, Walter. 2015. "Tracing the Roots of the Civil Rights and Social Justice Section" Human Rights Magazine Vol. 41, No. 3 - 50th Anniversary Issue, available https://www.americanbar.org/groups/crsj/publications/human_rights_magazine_home/2015-vol-41/vol-41--no-3-50th-anniversary-issue/tracing-the-roots-of-the-civil-rights-and-social-justice-section/ AND https://www.americanbar.org/about_the…	0	policy	actual
1925	good	Jim Crow	labor market	law career	whether the American Bar Association would admit Black people	30000	Discriminatory policy excludes Black members from American Bar Association	lawyers	-0.994	0.0006056	-1634.88	30000	1	29998	-0.994435	-2.94082	0.00577379	-2.92951	-2.95214	6.41e-05	3.7e-07	-0.994434	-0.994436	Assumes 1 Black member deemed acceptable out of 30,000 possible candidates, 10% of which are Black.	White Jr, Walter. 2015. "Tracing the Roots of the Civil Rights and Social Justice Section" Human Rights Magazine Vol. 41, No. 3 - 50th Anniversary Issue, available https://www.americanbar.org/groups/crsj/publications/human_rights_magazine_home/2015-vol-41/vol-41--no-3-50th-anniversary-issue/tracing-the-roots-of-the-civil-rights-and-social-justice-section/ AND https://www.americanbar.org/about_the…	0	policy	actual
1926	good	Jim Crow	labor market	law career	whether the American Bar Association would admit Black people	30000	Discriminatory policy excludes Black members from American Bar Association	lawyers	-0.994	0.0006056	-1634.88	30000	1	29998	-0.994435	-2.94082	0.00577	-2.92951	-2.95214	6.41e-05	3.7e-07	-0.994434	-0.994436	Assumes 1 Black member deemed acceptable out of 30,000 possible candidates, 10% of which are Black.	White Jr, Walter. 2015. "Tracing the Roots of the Civil Rights and Social Justice Section" Human Rights Magazine Vol. 41, No. 3 - 50th Anniversary Issue, available https://www.americanbar.org/groups/crsj/publications/human_rights_magazine_home/2015-vol-41/vol-41--no-3-50th-anniversary-issue/tracing-the-roots-of-the-civil-rights-and-social-justice-section/ AND https://www.americanbar.org/about_the…	0	policy	actual
1927	good	Jim Crow	labor market	law career	whether the American Bar Association would admit Black people	30000	Discriminatory policy excludes Black members from American Bar Association	lawyers	-0.994	0.0006056	-1634.88	30000	1	29998	-0.994435	-2.94082	0.00577379	-2.92951	-2.95214	6.41e-05	3.7e-07	-0.994434	-0.994436	Assumes 1 Black member deemed acceptable out of 30,000 possible candidates, 10% of which are Black.	White Jr, Walter. 2015. "Tracing the Roots of the Civil Rights and Social Justice Section" Human Rights Magazine Vol. 41, No. 3 - 50th Anniversary Issue, available https://www.americanbar.org/groups/crsj/publications/human_rights_magazine_home/2015-vol-41/vol-41--no-3-50th-anniversary-issue/tracing-the-roots-of-the-civil-rights-and-social-justice-section/ AND https://www.americanbar.org/about_the…	0	policy	actual
1928	good	Jim Crow	labor market	law career	whether the American Bar Association would admit Black people	30000	Discriminatory policy excludes Black members from American Bar Association	lawyers	-0.994	0.0006056	-1634.88	30000	1	29998	-0.994435	-2.94082	0.00577	-2.92951	-2.95214	6.41e-05	3.7e-07	-0.994434	-0.994436	Assumes 1 Black member deemed acceptable out of 30,000 possible candidates, 10% of which are Black.	White Jr, Walter. 2015. "Tracing the Roots of the Civil Rights and Social Justice Section" Human Rights Magazine Vol. 41, No. 3 - 50th Anniversary Issue, available https://www.americanbar.org/groups/crsj/publications/human_rights_magazine_home/2015-vol-41/vol-41--no-3-50th-anniversary-issue/tracing-the-roots-of-the-civil-rights-and-social-justice-section/ AND https://www.americanbar.org/about_the…	0	policy	actual
1929	good	Jim Crow	labor market	law career	whether the American Bar Association would admit Black people	30000	Discriminatory policy excludes Black members from American Bar Association	lawyers	-0.994	0.0006056	-1634.88	30000	1	29998	-0.994435	-2.94082	0.00577379	-2.92951	-2.95214	6.41e-05	3.7e-07	-0.994434	-0.994436	Assumes 1 Black member deemed acceptable out of 30,000 possible candidates, 10% of which are Black.	White Jr, Walter. 2015. "Tracing the Roots of the Civil Rights and Social Justice Section" Human Rights Magazine Vol. 41, No. 3 - 50th Anniversary Issue, available https://www.americanbar.org/groups/crsj/publications/human_rights_magazine_home/2015-vol-41/vol-41--no-3-50th-anniversary-issue/tracing-the-roots-of-the-civil-rights-and-social-justice-section/ AND https://www.americanbar.org/about_the…	0	policy	actual
1930	good	Jim Crow	labor market	law career	whether the American Bar Association would admit Black people	30000	Discriminatory policy excludes Black members from American Bar Association	lawyers	-0.994	0.0006056	-1634.88	30000	1	29998	-0.994435	-2.94082	0.00577379	-2.92951	-2.95214	6.41e-05	3.7e-07	-0.994434	-0.994436	Assumes 1 Black member deemed acceptable out of 30,000 possible candidates, 10% of which are Black.	White Jr, Walter. 2015. "Tracing the Roots of the Civil Rights and Social Justice Section" Human Rights Magazine Vol. 41, No. 3 - 50th Anniversary Issue, available https://www.americanbar.org/groups/crsj/publications/human_rights_magazine_home/2015-vol-41/vol-41--no-3-50th-anniversary-issue/tracing-the-roots-of-the-civil-rights-and-social-justice-section/ AND https://www.americanbar.org/about_the…	0	policy	actual
1931	good	Jim Crow	labor market	law career	whether the American Bar Association would admit Black people	30000	Discriminatory policy excludes Black members from American Bar Association	lawyers	-0.994	0.0006056	-1634.88	30000	1	29998	-0.994435	-2.94082	0.00577379	-2.92951	-2.95214	6.41e-05	3.7e-07	-0.994434	-0.994436	Assumes 1 Black member deemed acceptable out of 30,000 possible candidates, 10% of which are Black.	White Jr, Walter. 2015. "Tracing the Roots of the Civil Rights and Social Justice Section" Human Rights Magazine Vol. 41, No. 3 - 50th Anniversary Issue, available https://www.americanbar.org/groups/crsj/publications/human_rights_magazine_home/2015-vol-41/vol-41--no-3-50th-anniversary-issue/tracing-the-roots-of-the-civil-rights-and-social-justice-section/ AND https://www.americanbar.org/about_the…	0	policy	actual
1932	good	Jim Crow	labor market	law career	whether the American Bar Association would admit Black people	30000	Discriminatory policy excludes Black members from American Bar Association	lawyers	-0.994	0.0006056	-1634.88	30000	1	29998	-0.994435	-2.94082	0.00577379	-2.92951	-2.95214	6.41e-05	3.7e-07	-0.994434	-0.994436	Assumes 1 Black member deemed acceptable out of 30,000 possible candidates, 10% of which are Black.	White Jr, Walter. 2015. "Tracing the Roots of the Civil Rights and Social Justice Section" Human Rights Magazine Vol. 41, No. 3 - 50th Anniversary Issue, available https://www.americanbar.org/groups/crsj/publications/human_rights_magazine_home/2015-vol-41/vol-41--no-3-50th-anniversary-issue/tracing-the-roots-of-the-civil-rights-and-social-justice-section/ AND https://www.americanbar.org/about_the…	0	policy	actual
1933	good	Jim Crow	labor market	law career	whether the American Bar Association would admit Black people	30000	Discriminatory policy excludes Black members from American Bar Association	lawyers	-0.994	0.0006056	-1634.88	30000	1	29998	-0.994435	-2.94082	0.00577379	-2.92951	-2.95214	6.41e-05	3.7e-07	-0.994434	-0.994436	Assumes 1 Black member deemed acceptable out of 30,000 possible candidates, 10% of which are Black.	White Jr, Walter. 2015. "Tracing the Roots of the Civil Rights and Social Justice Section" Human Rights Magazine Vol. 41, No. 3 - 50th Anniversary Issue, available https://www.americanbar.org/groups/crsj/publications/human_rights_magazine_home/2015-vol-41/vol-41--no-3-50th-anniversary-issue/tracing-the-roots-of-the-civil-rights-and-social-justice-section/ AND https://www.americanbar.org/about_the…	0	policy	actual
1934	good	Jim Crow	labor market	law career	whether the American Bar Association would admit Black people	30000	Discriminatory policy excludes Black members from American Bar Association	lawyers	-0.994	0.0006056	-1634.88	30000	1	29998	-0.994435	-2.94082	0.00577379	-2.92951	-2.95214	6.41e-05	3.7e-07	-0.994434	-0.994436	Assumes 1 Black member deemed acceptable out of 30,000 possible candidates, 10% of which are Black.	White Jr, Walter. 2015. "Tracing the Roots of the Civil Rights and Social Justice Section" Human Rights Magazine Vol. 41, No. 3 - 50th Anniversary Issue, available https://www.americanbar.org/groups/crsj/publications/human_rights_magazine_home/2015-vol-41/vol-41--no-3-50th-anniversary-issue/tracing-the-roots-of-the-civil-rights-and-social-justice-section/ AND https://www.americanbar.org/about_the…	0	policy	actual
1935	good	Jim Crow	labor market	law career	whether the American Bar Association would admit Black people	30000	Discriminatory policy excludes Black members from American Bar Association	lawyers	-0.994	0.0006056	-1634.88	30000	1	29998	-0.994435	-2.94082	0.00577379	-2.92951	-2.95214	6.41e-05	3.7e-07	-0.994434	-0.994436	Assumes 1 Black member deemed acceptable out of 30,000 possible candidates, 10% of which are Black.	White Jr, Walter. 2015. "Tracing the Roots of the Civil Rights and Social Justice Section" Human Rights Magazine Vol. 41, No. 3 - 50th Anniversary Issue, available https://www.americanbar.org/groups/crsj/publications/human_rights_magazine_home/2015-vol-41/vol-41--no-3-50th-anniversary-issue/tracing-the-roots-of-the-civil-rights-and-social-justice-section/ AND https://www.americanbar.org/about_the…	0	policy	actual
1936	good	Jim Crow	labor market	law career	whether the American Bar Association would admit Black people	30000	Discriminatory policy excludes Black members from American Bar Association	lawyers	-0.994	0.0006056	-1634.88	30000	1	29998	-0.994435	-2.94082	0.00577379	-2.92951	-2.95214	6.41e-05	3.7e-07	-0.994434	-0.994436	Assumes 1 Black member deemed acceptable out of 30,000 possible candidates, 10% of which are Black.	White Jr, Walter. 2015. "Tracing the Roots of the Civil Rights and Social Justice Section" Human Rights Magazine Vol. 41, No. 3 - 50th Anniversary Issue, available https://www.americanbar.org/groups/crsj/publications/human_rights_magazine_home/2015-vol-41/vol-41--no-3-50th-anniversary-issue/tracing-the-roots-of-the-civil-rights-and-social-justice-section/ AND https://www.americanbar.org/about_the…	0	policy	actual
1937	good	Jim Crow	labor market	law career	whether the American Bar Association would admit Black people	30000	Discriminatory policy excludes Black members from American Bar Association	lawyers	-0.994	0.0006056	-1634.88	30000	1	29998	-0.994435	-2.94082	0.00577379	-2.92951	-2.95214	6.41e-05	3.7e-07	-0.994434	-0.994436	Assumes 1 Black member deemed acceptable out of 30,000 possible candidates, 10% of which are Black.	White Jr, Walter. 2015. "Tracing the Roots of the Civil Rights and Social Justice Section" Human Rights Magazine Vol. 41, No. 3 - 50th Anniversary Issue, available https://www.americanbar.org/groups/crsj/publications/human_rights_magazine_home/2015-vol-41/vol-41--no-3-50th-anniversary-issue/tracing-the-roots-of-the-civil-rights-and-social-justice-section/ AND https://www.americanbar.org/about_the…	0	policy	actual
1938	good	Jim Crow	labor market	law career	whether the American Bar Association would admit Black people	30000	Discriminatory policy excludes Black members from American Bar Association	lawyers	-0.994	0.0006056	-1634.88	30000	1	29998	-0.994435	-2.94082	0.00577379	-2.92951	-2.95214	6.41e-05	3.7e-07	-0.994434	-0.994436	Assumes 1 Black member deemed acceptable out of 30,000 possible candidates, 10% of which are Black.	White Jr, Walter. 2015. "Tracing the Roots of the Civil Rights and Social Justice Section" Human Rights Magazine Vol. 41, No. 3 - 50th Anniversary Issue, available https://www.americanbar.org/groups/crsj/publications/human_rights_magazine_home/2015-vol-41/vol-41--no-3-50th-anniversary-issue/tracing-the-roots-of-the-civil-rights-and-social-justice-section/ AND https://www.americanbar.org/about_the…	0	policy	actual
1939	good	Jim Crow	labor market	law career	whether the American Bar Association would admit Black people	30000	Discriminatory policy excludes Black members from American Bar Association	lawyers	-0.994	0.0006056	-1634.88	30000	1	29998	-0.994435	-2.94082	0.00577379	-2.92951	-2.95214	6.41e-05	3.7e-07	-0.994434	-0.994436	Assumes 1 Black member deemed acceptable out of 30,000 possible candidates, 10% of which are Black.	White Jr, Walter. 2015. "Tracing the Roots of the Civil Rights and Social Justice Section" Human Rights Magazine Vol. 41, No. 3 - 50th Anniversary Issue, available https://www.americanbar.org/groups/crsj/publications/human_rights_magazine_home/2015-vol-41/vol-41--no-3-50th-anniversary-issue/tracing-the-roots-of-the-civil-rights-and-social-justice-section/ AND https://www.americanbar.org/about_the…	0	policy	actual
1940	good	Jim Crow	labor market	law career	whether the American Bar Association would admit Black people	30000	Discriminatory policy excludes Black members from American Bar Association	lawyers	-0.994	0.0006056	-1634.88	30000	1	29998	-0.994435	-2.94082	0.00577	-2.92951	-2.95214	6.41e-05	3.7e-07	-0.994434	-0.994436	Assumes 1 Black member deemed acceptable out of 30,000 possible candidates, 10% of which are Black.	White Jr, Walter. 2015. "Tracing the Roots of the Civil Rights and Social Justice Section" Human Rights Magazine Vol. 41, No. 3 - 50th Anniversary Issue, available https://www.americanbar.org/groups/crsj/publications/human_rights_magazine_home/2015-vol-41/vol-41--no-3-50th-anniversary-issue/tracing-the-roots-of-the-civil-rights-and-social-justice-section/ AND https://www.americanbar.org/about_the…	0	policy	actual
1941	good	Jim Crow	labor market	law career	whether the American Bar Association would admit Black people	30000	Discriminatory policy excludes Black members from American Bar Association	lawyers	-0.994	0.0006056	-1634.88	30000	1	29998	-0.994435	-2.94082	0.00577379	-2.92951	-2.95214	6.41e-05	3.7e-07	-0.994434	-0.994436	Assumes 1 Black member deemed acceptable out of 30,000 possible candidates, 10% of which are Black.	White Jr, Walter. 2015. "Tracing the Roots of the Civil Rights and Social Justice Section" Human Rights Magazine Vol. 41, No. 3 - 50th Anniversary Issue, available https://www.americanbar.org/groups/crsj/publications/human_rights_magazine_home/2015-vol-41/vol-41--no-3-50th-anniversary-issue/tracing-the-roots-of-the-civil-rights-and-social-justice-section/ AND https://www.americanbar.org/about_the…	0	policy	actual
1942	good	Jim Crow	labor market	law career	whether the American Bar Association would admit Black people	30000	Discriminatory policy excludes Black members from American Bar Association	lawyers	-0.994	0.0006056	-1634.88	30000	1	29998	-0.994	-2.94	0.00577379	-2.92951	-2.95214	6.41e-05	3.7e-07	-0.994	-0.994	Assumes 1 Black member deemed acceptable out of 30,000 possible candidates, 10% of which are Black.	White Jr, Walter. 2015. "Tracing the Roots of the Civil Rights and Social Justice Section" Human Rights Magazine Vol. 41, No. 3 - 50th Anniversary Issue, available https://www.americanbar.org/groups/crsj/publications/human_rights_magazine_home/2015-vol-41/vol-41--no-3-50th-anniversary-issue/tracing-the-roots-of-the-civil-rights-and-social-justice-section/ AND https://www.americanbar.org/about_the…	0	policy	actual
1943	good	Jim Crow	labor market	law career	whether the American Bar Association would admit Black people	30000	Discriminatory policy excludes Black members from American Bar Association	lawyers	0	0	0	30000	1	29998	0	0	0.00577	0.0113166	-0.0113166	0.00577	3.33e-05	6.53e-05	-6.53e-05	Assumes Black member deemed acceptable out of 30,000 possible candidates, 10% of which are Black.	White Jr, Walter. 2015. "Tracing the Roots of the Civil Rights and Social Justice Section" Human Rights Magazine Vol. 41, No. 3 - 50th Anniversary Issue, available https://www.americanbar.org/groups/crsj/publications/human_rights_magazine_home/2015-vol-41/vol-41--no-3-50th-anniversary-issue/tracing-the-roots-of-the-civil-rights-and-social-justice-section/ AND https://www.americanbar.org/about_the…	0	policy	actual
1971	good	Post-Civil Rights era	labor market	merit pay	Effect of race on pay	1330	employees	employees	1.45683	3.78677	0.384716	1330	8	1321	0.0105844	0.0105848	0.0274514	0.0643895	-0.04322	0.0274277	0.000752	0.0120584	0.00911029	Results from Table 2, top panel, using results that adjust for initial job level. The weighted average of the coefficients and standard errors is calculated using the number of Black workers as the weight	Cassell, F. H., Director, S. M., & Doctors, S. I. (1975). Discrimination Within Internal Labor Markets. Industrial Relations, 14(3).	1	model-adjusted	actual
2000	good	21st century	labor market	merit pay	Effect of race on pay increase	5105	employees	employees	-0.005	0.0015	-3.33333	5105	14	5090	-0.0466709	-0.0467048	0.014	-0.0192647	-0.074145	0.014	0.000195	-0.0462878	-0.0470541	Table 2, column 2	Castilla, Emilio J. "Accounting for the gap: A firm study manipulating organizational accountability and transparency in pay decisions." Organization Science 26, no. 2 (2015): 311-333.	1	model-adjusted	actual
2006	good	21st century	labor market	merit pay	Effect of race on pay increase	5719	employees	employees	-0.002	0.0011	-1.81818	5719	14	5704	-0.024067	-0.0240716	0.0132268	0.00185284	-0.0499961	0.0132168	0.000175	-0.0237244	-0.0244095	Table 2, column 5	Castilla, Emilio J. "Accounting for the gap: A firm study manipulating organizational accountability and transparency in pay decisions." Organization Science 26, no. 2 (2015): 311-333.	1	model-adjusted	actual
1988-2003	good	Post-Civil Rights era	labor market	merit pay	Effect of race on pay increase	166106	employees	Employees of the U.S. federal government, 1% sample	0.136	0.059	2.30508	166106	36	166069	0.00565634	0.0056564	0.00245364	0.0104655	0.000847263	0.00245355	6.02e-06	0.00566814	0.00564454	Table 3.3. Calculate weighted average across gender to get black vs white comparison. This is for wage growth conditional on receiving an outstanding performance rating by supervisor	Oh, Seong Soo, "The Impact of Performance Ratings on Federal Personnel Decisions." Dissertation, Georgia State University, 2010. doi: https://doi.org/10.57709/2852946	1	model-adjusted	actual
1992-1995	good	Post-Civil Rights era	labor market	merit pay	Effect of race on pay increase	1282	employees	workers in Atlanta, New York, Detroit, and Los Angeles. Randomly sampled	0.0125	0.0165563	0.755	1282	36	1245	0.0213926	0.0213958	0.0279618	0.0762009	-0.0334092	0.0279272	0.00078	0.0229213	0.0198638	Coefficients from Table 5. Effect of black race on wage growth. I calculate average across men and women using columns 2 and 4 (wage growth)	Blau, F. D., & DeVaro, J. (2007). New evidence on gender differences in promotion rates: An empirical analysis of a sample of new hires. Industrial Relations: A Journal of Economy and Society, 46(3), 511-550.	1	model-adjusted	actual
1994-2003	good	Post-Civil Rights era	labor market	merit pay	Effect of race on pay	62057	employees	Employees working for the state of North Carolina	-0.003	0.007	-0.428571	62057	66	61990	-0.00172132	-0.00172132	0.00401435	0.0061468	-0.00958945	0.00401427	1.61e-05	-0.00168974	-0.0017529	Appendix Table F1, earnings column. Coefficient on Black (can be interpreted as Black male), but effect is similar for Black female, which basically cancels out the (white) female coefficient	Krull, H. (2007). Earnings disparities: The role of internal promotions and job performance evaluations. The University of North Carolina at Chapel Hill.	1	model-adjusted	actual
1999-2008	good	21st century	labor market	merit pay	how race affect salary of National Basketball Association players conditional on performance	2611	U.S. born NBA players	professional athletes	-0.162	0.04	-4.05	2611	1	2609	-0.0790418	-0.0792071	0.0195815	-0.0408273	-0.117587	0.0194517	0.000381	-0.0782957	-0.079788	Model results from Table 5	Yang, C. H., & Lin, H. Y. (2012). Is there salary discrimination by nationality in the NBA? Foreign talent or foreign market. Journal of Sports Economics, 13(1), 53-75.	1	model-adjusted	actual
1971	bad	Post-Civil Rights era	labor market	promotion	Effect of race on probability of promotion	1330	employees	employees	0.0123373	0.0956132	0.129033	1330	8	1321	0.00355016	0.00355018	0.0274514	0.0573549	-0.0502546	0.0274304	0.000752	0.00502438	0.00207594	Results from Table 2, middle panel, using results that adjust for initial job level. The weighted average of the coefficients and standard errors is calculated using the number of Black workers as the weight	Cassell, F. H., Director, S. M., & Doctors, S. I. (1975). Discrimination Within Internal Labor Markets. Industrial Relations, 14(3).	1	model-adjusted	actual
1990	good	Post-Civil Rights era	labor market	promotion	Effect of race on probability of promotion conditional on job performance	1001	financial services company	employees	-0.495	0.37355	-1.32512	1001	18	982	-0.0422486	-0.0422738	0.0316544	0.0197689	-0.104317	0.0315663	0.000998	-0.0402931	-0.0442042	Coefficients from Table 4, averaged together for minority men and women	Paulin, E. A., & Mellor, J. M. (1996). Gender, Race, and Promotions within a Private?Sector Firm. Industrial Relations: A Journal of Economy and Society, 35(2), 276-295.	1	model-adjusted	actual
1990	good	Post-Civil Rights era	labor market	promotion	how race affects promotion of managers conditional on performance rating	338	managers	managers	1.26	1.26	1	338	8	329	0.0550482	0.0551039	0.0546358	0.16219	-0.0519823	0.0543084	0.00295	0.060838	0.0492584	Table 1. results for race. T-stat is assumed to be one, but is flagged as merely insignificant, suggesting it is below 1.96	Sheridan, J. E., Slocum, J. W., & Buda, R. (1997). Factors influencing the probability of employee promotions: A comparative analysis of human capital, organization screening and gender/race discrimination theories. Journal of Business and Psychology, 11, 373-380.	1	model-adjusted	actual
1988-2003	good	Post-Civil Rights era	labor market	promotion	Effect of race on promotion	228409	employees	Employees of the U.S. federal government, 1% sample	0.027	0.043	0.627907	166106	36	166069	0.00154082	0.00154082	0.00245364	0.00634996	-0.00326832	0.00245362	6.02e-06	0.00155262	0.00152902	Table 3.4. Calculate weighted average across gender to get black vs white comparison. This is the probability of promotion conditional on receiving an outstanding performance rating by supervisor	Oh, Seong Soo, "The Impact of Performance Ratings on Federal Personnel Decisions." Dissertation, Georgia State University, 2010. doi: https://doi.org/10.57709/2852946	1	model-adjusted	actual
1992-1995	good	Post-Civil Rights era	labor market	promotion	Effect of race on probability of promotion conditional on job performance	1826	employees	workers in Atlanta, New York, Detroit, and Los Angeles. Randomly sampled	0.046	0.0215962	2.13	1826	36	1789	0.050295	0.0503374	0.0234211	0.0962427	0.00443214	0.023349	0.000546	0.0513659	0.049224	Coefficients from Table 3. Effect of black race on promotion.	Blau, F. D., & DeVaro, J. (2007). New evidence on gender differences in promotion rates: An empirical analysis of a sample of new hires. Industrial Relations: A Journal of Economy and Society, 46(3), 511-550.	1	model-adjusted	actual
1994-2003	good	Post-Civil Rights era	labor market	promotion	Effect of race on promotion	62057	employees	Employees working for the state of North Carolina	-0.082	0.308	-0.266234	62057	66	61990	-0.00106931	-0.00106931	0.00401435	0.00679882	-0.00893743	0.00401428	1.61e-05	-0.00103772	-0.00110089	Appendix Table F1, promotion column. Coefficient on Black (can be interpreted as Black male), but effect is similar for Black female, which basically cancels out the (white) female coefficient	Krull, H. (2007). Earnings disparities: The role of internal promotions and job performance evaluations. The University of North Carolina at Chapel Hill.	1	model-adjusted	actual
1962	good	Jim Crow	labor market	resume evaluation	Black vs White resume evaluations	32	manager evaluations of resumes in Illinois	fictious resumes reviewed				32			-0.303315	-0.313166	0.185695	0.0507964	-0.677129	0.163082	0.0288	-0.24681	-0.35982	Data from Table 3 shows r-squared as percent. The square root of that value should correspond to the r-value.	Triandis, Harry C. "Factors affecting employee selection in two cultures." Journal of Applied Psychology 47, no. 2 (1963): 89.	1	audit	actual
1977	good	Post-Civil Rights era	labor market	resume evaluation	Black vs White resume evaluations	1600	candidate-employer interactions	fictious resumes reviewed by managers at 100 large firms in Illinois	0.02	0.07	0.285714	1600	2	1598	0.00714714	0.00714726	0.0250235	0.0561933	-0.0418987	0.0250065	0.000625	0.00837246	0.00592182	Ttesti command using data in Table 2. Compare mean Black to mean White effect	Haefner JE. Race, Age, Sex, and Competence as Factors in Employer Selection of the Disadvantaged. Journal of Applied Psychology. 1977;62(2):199-202	1	audit	actual
1977	good	Post-Civil Rights era	labor market	resume evaluation	Black vs White resume evaluations	204	candidate-employer interactions	fictious resumes reviewed	0.0588235	0.043452	1.35376	204	2	202	0.0948209	0.0951067	0.0705346	0.233354	-0.0431411	0.0695552	0.00487	0.104366	0.085276	Data from Table 1. Diagonal represented neutral treatment. Data above diagonal represents positive biased treatment. Ran algorithim for audits using these data	Newman, J. M. (1978). Discrimination in recruitment: An empirical analysis. ILR Review, 32(1), 15-23.	1	audit	actual
1980	good	Post-Civil Rights era	labor market	resume evaluation	Black vs White favorable responses	915	candidate-employer interactions	entry level college	0.0764192	0.0234576	3.25776	916	1	915	0.107079	0.107491	0.0330952	0.172358	0.0426245	0.0326799	0.00108	0.109195	0.104963	Run algorithm for audit studies. Estimate effect size by regressing Black racial status on applicant success.	McIntyre, Shelby, Dennis J. Moberg, and Barry Z. Posner. "Preferential treatment in preselection decisions according to sex and race." Academy of Management Journal 23, no. 4 (1980): 738-749.	1	audit	race stated on resume
1990	good	Post-Civil Rights era	labor market	resume evaluation	Black vs White call back rates	583	candidate-employer interactions	job applicants	-0.0620675	0.0239164	-2.59519	583	1	581	-0.107048	-0.10746	0.0415227	-0.0260749	-0.188844	0.0409763	0.0017	-0.103722	-0.110374	Using Table from Table 1, I created a hypothetical database with the same summary characteristics and regressed Black racial status on applicant success. The original data are from a 1990 Urban Institute audit and a related follow-up study	Heckman, James J. "Detecting discrimination." Journal of economic perspectives 12, no. 2 (1998): 101-116.	1	audit	paired auditors
1990	good	Post-Civil Rights era	labor market	resume evaluation	Black vs White gaps in job offer	145	candidate-employer interactions	job applicants in Denver	-0.0256849	0.0576332	-0.445662	145	1	143	-0.0372422	-0.0372595	0.0839181	0.12722	-0.201739	0.0832178	0.00691	-0.023697	-0.0507875	Table 3 from James F. and DelCastillo S. (1992), “Measuring job discrimination, Hopeful evidence from recent audits”, Harvard Journal of African American Public Policy, 1, p. 35-53.	Shalom, S. R. (1998). Dubious data: The thernstroms on race in america. Race & Society, 1(2), 125–157. https://doi.org/10.1016/S1090-9524(99)80041-2	1	audit	in-person
2001	good	21st century	labor market	resume evaluation	Black vs White call back rates	4784	candidate-employer interactions	job applicants	-0.0318248	0.0077205	-4.12212	4784	25	4759	-0.059647	-0.0597179	0.0144624	-0.0313716	-0.0880642	0.0144079	0.000208	-0.0592387	-0.0600553	Rothwell analysis of underlying data. Lasso model used to select covariates.	Bertrand, Marianne, and Sendhil Mullainathan. "Are Emily and Greg more employable than Lakisha and Jamal? A field experiment on labor market discrimination." American economic review 94, no. 4 (2004): 991-1013.	1	audit	stereotypical names
2001	good	21st century	labor market	resume evaluation	Black vs White call back rates	350	candidate-employer interactions	job applicants	0.1628	0.0392863	4.14394	350	1	348	0.216852	0.220351	0.0536828	0.325569	0.115133	0.0510116	0.00273	0.222197	0.211508	Data from Figure 6, combined average within racial groups, so that mean callback is 9.5% for Black applicants and 25.5 for White applicants. Used audit algorithm to calculate standard error and effect size	Pager, D. (2003). The mark of a criminal record. American journal of sociology, 108(5), 937-975.	1	audit	actual
2004	good	21st century	labor market	resume evaluation	Black vs White call back rates	342	candidate-employer interactions	job applicants	-0.157895	0.0449055	-3.51616	342	1	340	-0.187315	-0.189553	0.0543125	-0.0831005	-0.296006	0.052253	0.00283	-0.181777	-0.192853	Data from Fig 1a.	Pager, D., Bonikowski, B., & Western, B. (2009). Discrimination in a low-wage labor market: A field experiment. American sociological review, 74(5), 777-799.	1	audit	actual
2008	good	21st century	labor market	resume evaluation	Black vs White call back rates	300	candidate-employer interactions	job applicants	-0.0333333	0.041	-0.813007	300	1	298	-0.0470441	-0.0470789	0.0580259	0.0666519	-0.16081	0.0577035	0.00333	-0.0405143	-0.0535739	Data from abstract and Table 1 (sample size). Averaged callbacks within race.	Galgano, S. W. (2009). Barriers to reintegration: An audit study of the impact of race and offender status on employment opportunities for women. Social Thought & Research, 21-37.	1	audit	stereotypical names
2008	good	21st century	labor market	resume evaluation	Black vs White call back rates	605	candidate-employer interactions	job applicants in New York City	0.0154885	0.02546	0.608346	605	1	603	0.0247662	0.0247712	0.040757	0.104655	-0.0551124	0.0406645	0.00165	0.0280065	0.0215258	Used callback rate and sample numbers from Table 3, combining all data for Black and White candidates. Ran through hiring algorithm to calculate effect size and standard errors.	Kleykamp, M. (2009). A Great Place to Start?: The Effect of Prior Military Service on Hiring. Armed Forces & Society (0095-327X), 35(2), 266–285. https://doi-org.proxy.lib.sfu.ca/10.1177/0095327X07308631	1	audit	stereotypical names
2011	good	21st century	labor market	resume evaluation	Black vs White call back rates	3108	candidate-employer interactions	job applicants	-0.17	0.24	-0.708333	3108	7	3100	-0.012721	-0.0127217	0.0179461	0.0224526	-0.047896	0.0179374	0.000322	-0.0120904	-0.0133516	Online applications, Table 6, men	Decker, S. H., Spohn, C., Ortiz, N. R., & Hedberg, E. (2014). Criminal stigma, race, gender, and employment: An expanded assessment of the consequences of imprisonment for employment. Unpublished Final Report. USA [United States of America]: USA Department of Justice. Available online also at: https://www. ncjrs. gov/pdffiles1/nij/grants/244756. pdf [accessed in Ilorin, Nigeria: 21st February 201…	1	audit	stereotypical names
2011	good	21st century	labor market	resume evaluation	Black vs White call back rates	288	candidate-employer interactions	job applicants	-1.32	0.63	-2.09524	288	7	280	-0.124244	-0.12489	0.0592349	-0.00878913	-0.24099	0.0581169	0.00342	-0.117532	-0.130956	In-person applications, Table 6, men	Decker, S. H., Spohn, C., Ortiz, N. R., & Hedberg, E. (2014). Criminal stigma, race, gender, and employment: An expanded assessment of the consequences of imprisonment for employment. Unpublished Final Report. USA [United States of America]: USA Department of Justice. Available online also at: https://www. ncjrs. gov/pdffiles1/nij/grants/244756. pdf [accessed in Ilorin, Nigeria: 21st February 201…	1	audit	in-person
2011	good	21st century	labor market	resume evaluation	Black vs White call back rates	3090	candidate-employer interactions	job applicants	-0.52	0.23	-2.26087	3090	7	3082	-0.0406911	-0.0407136	0.0179983	-0.00543689	-0.0759903	0.0179627	0.000323	-0.0400577	-0.0413244	Online applications, Table 4, women	Decker, S. H., Spohn, C., Ortiz, N. R., & Hedberg, E. (2014). Criminal stigma, race, gender, and employment: An expanded assessment of the consequences of imprisonment for employment. Unpublished Final Report. USA [United States of America]: USA Department of Justice. Available online also at: https://www. ncjrs. gov/pdffiles1/nij/grants/244756. pdf [accessed in Ilorin, Nigeria: 21st February 201…	1	audit	stereotypical names
2011	good	21st century	labor market	resume evaluation	Black vs White call back rates	252	candidate-employer interactions	job applicants	-0.27	0.97	-0.278351	252	7	244	-0.0178167	-0.0178186	0.0633724	0.106391	-0.142029	0.0630994	0.00397	-0.010026	-0.0256075	In-person applications, Table 4, women	Decker, S. H., Spohn, C., Ortiz, N. R., & Hedberg, E. (2014). Criminal stigma, race, gender, and employment: An expanded assessment of the consequences of imprisonment for employment. Unpublished Final Report. USA [United States of America]: USA Department of Justice. Available online also at: https://www. ncjrs. gov/pdffiles1/nij/grants/244756. pdf [accessed in Ilorin, Nigeria: 21st February 201…	1	audit	in-person
2011	good	21st century	labor market	resume evaluation	Black vs White call back rates	1904	candidate-employer interactions	job applicants	-0.0483193	0.014904	-3.24204	1904	1	1902	-0.0741337	-0.07427	0.0229355	-0.0293163	-0.119224	0.0227975	0.000522	-0.0731097	-0.0751578	Using data from Table 2 and Figure 2, I created a hypothetical database with the summary characteristics and regressed Black racial status on applicant success. Race-specific sample is 952. Total sample is 1904.	Gaddis, S. M. (2015). Discrimination in the credential society: An audit study of race and college selectivity in the labor market. Social Forces, 93(4), 1451-1479.	1	audit	stereotypical names
2014	good	21st century	labor market	resume evaluation	Black vs White call back rates	6382	candidate-employer interactions	job applicants	0.0084259	0.0123304	0.683343	6382	4787	1595	0.0171078	0.0171095	0.0125206	0.0416498	-0.0074308	0.0125149	0.000157	0.0174149	0.0168008	Discrimination in callback probability for Black vs White respondents	Deming, David J., Noam Yuchtman, Amira Abulafi, Claudia Goldin, and Lawrence F. Katz. "The value of postsecondary credentials in the labor market: An experimental study." American Economic Review 106, no. 3 (2016): 778-806.	1	audit	stereotypical names
2014	good	21st century	labor market	resume evaluation	Black vs White call back rates	10484	candidate-employer interactions	job applicants	0.004	0.0053545	0.747035	10484	1	10483	0.00729603	0.00729616	0.00976784	0.0264411	-0.0118488	0.00976639	9.54e-05	0.00748298	0.00710908	Discrimination in callback probability for Black vs White respondents	Deming, David J., Noam Yuchtman, Amira Abulafi, Claudia Goldin, and Lawrence F. Katz. "The value of postsecondary credentials in the labor market: An experimental study." American Economic Review 106, no. 3 (2016): 778-806.	1	audit	stereotypical names		1
2014	good	21st century	labor market	resume evaluation	Black vs White call back rates	244	candidate-employer interactions	job applicants	-0.106347	0.0531515	-2.00083	244	1	242	-0.127567	-0.128266	0.0644157	-0.00201127	-0.254521	0.0631061	0.00404	-0.119649	-0.135485	Data from Table 2	Mobasseri, S. (2019). Race, place, and crime: How violent crime events affect employment discrimination. American journal of sociology, 125(1), 63-104	1	audit	stereotypical names
2015	good	21st century	labor market	resume evaluation	Black vs White call back rates	14637	candidate-employer interactions	recent college graduates applying for jobs	-0.024	0.006	-4	14637	297	14340	-0.0333844	-0.0333968	0.00826644	-0.0171946	-0.049599	0.00825666	6.82e-05	-0.0332506	-0.0335181	Table 3 point estimate	Agan, Amanda, and Sonja Starr. "Ban the box, criminal records, and racial discrimination: A field experiment." The Quarterly Journal of Economics 133, no. 1 (2018): 191-235.	1	audit	stereotypical names
2015	good	21st century	labor market	resume evaluation	Black vs White interview requests	9396	candidate-employer interactions	recent college graduates applying for jobs	-0.02	0.006	-3.33333	9396	100	9296	-0.0345518	-0.0345656	0.0103181	-0.0143422	-0.054789	0.0103046	0.000106	-0.0343435	-0.0347602	Table 2 column 6. Point estimate with geographic controls	Nunley, John M., Adam Pugh, Nicholas Romero, and R. Alan Seals. "Racial discrimination in the labor market for recent college graduates: Evidence from a field experiment." The BE Journal of Economic Analysis & Policy 15, no. 3 (2015): 1093-1125.	1	audit	stereotypical names
2015	good	21st century	labor market	resume evaluation	Black vs White call back rates	300	candidate-employer interactions	job applicants	-0.05	0.0266903	-1.87334	800	1	798	-0.0661702	-0.066267	0.0354218	0.00315976	-0.135694	0.0352226	0.00125	-0.0637294	-0.068611	Data from Fig 1, holding experience constant, compare white vs black-sounding names, defining Black as "no name whitening" condition and White otherwise.	Kang, S. K., DeCelles, K. A., Tilcsik, A., & Jun, S. (2016). Whitened Résumés: Race and Self-Presentation in the Labor Market. Administrative Science Quarterly, 61(3), 469-502. https://doi.org/10.1177/0001839216639577	1	audit	stereotypical names
2016	good	21st century	labor market	resume evaluation	Black vs White call back rates	8914	candidate-employer interactions	job applicants	-0.0112	0.008	-1.4	8914	3	8911	-0.0148292	-0.0148303	0.0105934	0.00593287	-0.0355934	0.0105899	0.000112	-0.0146093	-0.015049	Table 1, column 1. Point estimate from main model.	Darolia, Rajeev, Cory Koedel, Paco Martorell, Katie Wilson, and Francisco Perez-Arce. "Race and gender effects on employer interest in job applicants: new evidence from a resume field experiment." Applied Economics Letters 23, no. 12 (2016): 853-856.	1	audit	stereotypical surnames but not given names
2017	good	21st century	labor market	resume evaluation	Black vs White call back rates	2744	candidate-employer interactions	job applicants	-0.095	0.024	-3.95833	2744	14	2729	-0.0755557	-0.0757	0.0191005	-0.038263	-0.113137	0.0189846	0.000362	-0.0748454	-0.0762661	Table 2, column 3	Gorzig, Marina Mileo, and Deborah Rho. "The effect of the 2016 United States presidential election on employment discrimination." Journal of Population Economics 35, no. 1 (2022): 45-88.	1	audit	stereotypical names
2019	good	21st century	labor market	resume evaluation	Black vs White call back rates	6949	candidate-employer interactions	low-skilled job applicants	-0.0199072	0.0090116	-2.20908	6949	69	6880	-0.0266233	-0.0266296	0.0119987	-0.00311226	-0.050147	0.0119884	0.000144	-0.0263415	-0.0269052	Discrimination in callback probability for Black vs White respondents, using replication file	Kline, Patrick, Evan K. Rose, and Christopher R. Walters. "Systemic discrimination among large US employers." The Quarterly Journal of Economics 137, no. 4 (2022): 1963-2036.	1	audit	stereotypical names
2019	good	21st century	labor market	resume evaluation	Black vs White call back rates	1200	candidate-employer interactions	job applicants in Cleveland	0.077	0.02	3.85	1200	1	1198	0.110551	0.111005	0.0289037	0.167656	0.0543534	0.0285266	0.000823	0.112165	0.108937	Pooled effect of race from Table 3	Leasure, P. and Kaminski, R.J. (2021), The Effectiveness of Certificates of Relief: A Correspondence Audit of Hiring Outcomes. Journal of Empirical Legal Studies, 18: 849-875. https://doi-org.proxy.lib.sfu.ca/10.1111/jels.12297	1	audit	in-person
2020	good	21st century	labor market	resume evaluation	Black vs White call back rates	35275	candidate-employer interactions	low-skilled job applicants	-0.0168731	0.0039969	-4.22157	35275	15	35112	-0.0225235	-0.0225273	0.00532457	-0.0120912	-0.0329635	0.00532172	2.83e-05	-0.022468	-0.0225791	Discrimination in callback probability for Black vs White respondents	Kline, Patrick, Evan K. Rose, and Christopher R. Walters. "Systemic discrimination among large US employers." The Quarterly Journal of Economics 137, no. 4 (2022): 1963-2036.	1	audit	stereotypical names
2024	good	21st century	labor market	resume evaluation	Black vs White call back rates	11190	candidate-employer interactions	software developer applicants	-0.0668454	0.009	-7.42727	11190		11189	-0.0700431	-0.070158	0.0094546	-0.051627	-0.088689	0.00940738	8.89e-05	-0.0698688	-0.0702174	Hypothetical database constructed from un-adjusted callback rates from data in Table 2 (emailed by author). Weighted average callback rates were calculated for all Black and all White candidates across job types.	Weisshaar, Katherine, Koji Chavez, and Tania Hutt. "Hiring Discrimination Under Pressures to Diversify: Gender, Race, and Diversity Commodification across Job Transitions in Software Engineering." American Sociological Review 89, no. 3 (2024): 584-613.	1	audit	stereotypical names
2024	good	21st century	labor market	resume evaluation	Black vs White call back rates	864	candidate-recruiter interactions	job applicants	0.04	0.04	1	145	1	143	0.0833333	0.083527	0.0839181	0.248007	-0.0809525	0.0827546	0.00687	0.0968032	0.0698634	Table 5, last column, whehter candidate is interviewed	Cowgill, B., & Perkowski, P. (2024). Delegation in hiring: Evidence from a two-sided audit. Journal of Political Economy Microeconomics, 2(4), 852-882.	1	audit	stereotypical names
2024	good	21st century	labor market	resume evaluation	Black vs White hiring rates	864	candidate-recruiter interactions	job applicants	0.02	0.01	2	145	1	143	0.164957	0.166478	0.0839181	0.330958	0.0019988	0.0810658	0.00673	0.178152	0.151762	Table 5, second to last column, estimated probability that candidate is hired	Cowgill, B., & Perkowski, P. (2024). Delegation in hiring: Evidence from a two-sided audit. Journal of Political Economy Microeconomics, 2(4), 852-882.	1	audit	stereotypical names
1989-1991	good	Post-Civil Rights era	labor market	resume evaluation	Black vs White gaps in interview request, job offers, wage offers	449	candidate-employer interactions	job applicants in Washington DC and Chicago	-0.169921	0.0325183	-5.22538	449	1	447	-0.239933	-0.244703	0.0473514	-0.151894	-0.337511	0.0445257	0.0021	-0.235814	-0.244051	Pooled effect across studies using Table 2. Outcome is any unfavorbale treatment (top panel)	Bendick Jr, M., Jackson, C. W., & Reinoso, V. A. (1994). Measuring employment discrimination through controlled experiments. The review of black political economy, 23(1), 25-48.	1	audit	in-person
1989-1991	good	Post-Civil Rights era	labor market	resume evaluation	Black vs White gaps in job offer	449	candidate-employer interactions	job applicants in Washington DC and Chicago	-0.102897	0.0279872	-3.67657	449	1	447	-0.171325	-0.173031	0.0473514	-0.0802222	-0.26584	0.0458588	0.00216	-0.167083	-0.175566	Pooled effect across studies using Table 2. Outcome is job offer (bottom panel)	Bendick Jr, M., Jackson, C. W., & Reinoso, V. A. (1994). Measuring employment discrimination through controlled experiments. The review of black political economy, 23(1), 25-48.	1	audit	in-person
2007-2008	good	21st century	labor market	resume evaluation	Black vs White call back rates	300	candidate-employer interactions	job applicants	-0.113245	0.0540919	-2.09357	300	1	298	-0.120395	-0.120982	0.0580259	-0.0072513	-0.234713	0.0569932	0.00329	-0.113946	-0.126845	Data from Table 1, combining within race	Uggen, C., Vuolo, M., Lageson, S., Ruhland, E., & K. WHITHAM, H. I. L. A. R. Y. (2014). The edge of stigma: An experimental audit of the effects of low?level criminal records on employment. Criminology, 52(4), 627-654.	1	audit	actual
2009-2010	good	21st century	labor market	resume evaluation	Black vs White call back rates	220	candidate-employer interactions	job applicants	-0.113071	0.0523674	-2.15919	220	1	218	-0.1447	-0.145722	0.0678844	-0.0126688	-0.278776	0.0661589	0.00446	-0.135957	-0.153442	Data from Table 2, ignoring foreign-sounding names	Jacquemet, N., & Yannelis, C. (2012). Indiscriminate discrimination: A correspondence test for ethnic homophily in the Chicago labor market. Labour Economics, 19(6), 824-832.	1	audit	stereotypical names
1913	good	Jim Crow	labor market	union membership	How race affects probability of eligibility for union, measured as percent of unions that accept Black people	60	labor unions	workers	-0.15	0.0012625	-118.812	100000	1	99998	-0.351714	-0.367399	0.00316233	-0.3612	-0.373597	0.00277111	8.76e-06	-0.351697	-0.351731	Data from correspondance survey conducted by Booker T Washington, asking if unions admit Black workers, approx date 1913	Booker T Washington, "The negro and the labor unions" The Atlantic Monthly (1857-1932); Jun 1913; 111, 756-767	0	policy	actual
1946	good	Jim Crow	labor market	union membership	How race affects probability of eligibility for union, measured as percent of unions that accept Black people	13500000	potential labor union members	workers	-0.189189	0.0323696	-5.84466	185	1	183	-0.397	-0.42	0.0741249	-0.274341	-0.56491	0.0621244	0.00457	-0.388	-0.406	Investigation of union bylaws and constitutions. Sample is 185 unions with 13.5 million members. There are 2.5 million members in unions that discriminate.	Summers, C. W. (1946). Admission policies of labor unions. The quarterly journal of economics, 61(1), 66-107.	0	policy	actual
1940	good	Jim Crow	labor market outcome	systemic effect of jim crow	how exposure to Jim Crow affected outcomes	154463	labor income in dollars	Black males	-145.92	6.13	-23.8042	154463	1	154461	-0.0604574	-0.0605313	0.00254444	-0.0555442	-0.0655184	0.00253512	6.45e-06	-0.0604448	-0.0604701	Results from Table 1	Althoff, L., & Reichardt, H. (2024). Jim Crow and Black economic progress after slavery. The Quarterly Journal of Economics, 139(4), 2279-2330.	1	total effect from slavery	actual			1
2023	good	21st century	labor market outcome	systemic effect of jim crow	how exposure to Jim Crow affected outcomes	547189	total income in dollars	Black males	-12487.7	1147.08	-10.8865	547189	1	547187	-0.0147155	-0.0147165	0.00135186	-0.0120669	-0.0173662	0.00135157	1.83e-06	-0.0147119	-0.0147191	Results from Table 2	Althoff, L., & Reichardt, H. (2024). Jim Crow and Black economic progress after slavery. The Quarterly Journal of Economics, 139(4), 2279-2330.	1	total effect from slavery	actual			1
2014	bad	21st century	law enforcement	audit rate of taxes	racial differences in auditing rate	120000000	tax payers	tax payers	0.813	0.003	271	120000000	1	119999999	0.0247312	0.0247363	9.13e-05	0.0249152	0.0245574	9.12e-05	8.33e-09	0.0247313	0.0247312	Table 1, model adjusted difference in auditing rate	Elzayn, Hadi, Evelyn Smith, Thomas Hertz, Cameron Guage, Arun Ramesh, Robin Fisher, Daniel E. Ho, and Jacob Goldin. "Measuring and mitigating racial disparities in tax audits." The Quarterly Journal of Economics (2024): qjae027.	1	model-adjusted	estimated based on name and geolocation
2009-2019	good	21st century	law enforcement	detention	Black race effect on probability of being released at initial hearing, conditional on risk factors	4809	Criminal offenders	suspect awaiting trial	0.008	0.014	0.571429	4809	3	4805	0.00824329	0.00824348	0.0144247	0.036516	-0.020029	0.0144208	0.000208	0.00865087	0.00783571	Table A1, disparate treatment model with full set of controls	Joshua Grossman, Julian Nyarko, and Sharad Goel. Racial bias as a multi-stage, multi-actor problem: An analysis of pretrial detention. Journal of Empirical Legal Studies, 20(1):86–133, 2023	1	model-adjusted	actual
2009-2019	good	21st century	law enforcement	detention	Black race effect on probability of being released after hearing, conditional on risk factors	4809	Criminal offenders	suspect awaiting trial	0.007	0.022	0.318182	4809	3	4805	0.00459	0.00459	0.0144247	0.0328627	-0.0236823	0.0144214	0.000208	0.005	0.00418	Table A2, disparate treatment model with full set of controls	Joshua Grossman, Julian Nyarko, and Sharad Goel. Racial bias as a multi-stage, multi-actor problem: An analysis of pretrial detention. Journal of Empirical Legal Studies, 20(1):86–133, 2023	1	model-adjusted	actual
2001	bad	21st century	law enforcement	police search	effect of race on probability of search, conditional on observable justifications (hit rate)	26121.2	police-civilian encounters leading to search	crime suspects in Tennessee	0.0090217	0.0052439	1.72042	26121.2	1	26119.2	0.0106446	0.010645	0.00618768	0.0227729	-0.00148286	0.00618675	3.83e-05	0.0107196	0.0105696	Hit rate from Exhibit 11: Evidence as a Percentage of Total Searches Statewide, by race. Search and stop numbers from appendix tables	Cohen-Vogel, Dan and Doss, Brian (2002): “Vehicle Stops and Race: A Study and Report in Response to Public Chapter 910 of 2000" Report to Comptroller of the Treasury.	1	success rate	actual
2003	bad	21st century	law enforcement	police search	effect of race on probability of search, conditional on observable justifications (hit rate)	24021	police-civilian encounters leading to search	crime suspects in Rhode Island (state patrol)	0.0570506	0.0052111	10.9479	24021	1	24019	0.0705	0.0706	0.00645255	0.0832288	0.0579348	0.00642025	4.14e-05	0.0705	0.0704	Hit rates suggest anti-black bias. I use audit/hit rate algorithm to create pseudo-database and esimate r directly.	Farrell, A., McDevitt, D. J., Cronin, Shea, Pierce, Erica (2003): “Rhode Island Traffic Stop Statistics Act Final Report," Northeastern University, Institute on Race and Justice.	1	success rate	actual
2015	bad	21st century	law enforcement	police search	effect of race on probability of search, conditional on observable justifications (hit rate)	2520	police-civilian encounters leading to search	crime suspects in New York City	0.0485869	0.0210579	2.3073	2520	1	2518	0.0459	0.046	0.0199323	0.085032	0.00689719	0.0198824	0.000396	0.0467	0.0452	Hit rate on searches. Hit defined as 1 if contraband found	New York City Police Department, https://www.nyc.gov/site/nypd/stats/reports-analysis/stopfrisk.page	0	success rate	actual
2016	bad	21st century	law enforcement	police search	effect of race on probability of search, conditional on observable justifications (hit rate)	1795	police-civilian encounters leading to search	crime suspects in New York City	0.0108091	0.024325	0.444362	1795	1	1793	0.0104936	0.0104939	0.0236228	0.0567946	-0.0358067	0.023607	0.000557	0.0115857	0.00940145	Hit rate on searches. Hit defined as 1 if contraband found	New York City Police Department, https://www.nyc.gov/site/nypd/stats/reports-analysis/stopfrisk.page	0	success rate	actual
2017	bad	21st century	law enforcement	police search	effect of race on probability of search, conditional on observable justifications (hit rate)	2125	police-civilian encounters leading to search	crime suspects in New York City	-0.0176528	0.0139458	-1.26581	2125	1	2123	-0.0274619	-0.0274689	0.0217084	0.0150796	-0.0700173	0.0216818	0.00047	-0.0265401	-0.0283838	Hit rate on searches. Hit defined as 1 if weapon found, other contraband found, or firearm found.	New York City Police Department, https://www.nyc.gov/site/nypd/stats/reports-analysis/stopfrisk.page	0	success rate	actual
2018	bad	21st century	law enforcement	police search	effect of race on probability of search, conditional on observable justifications (hit rate)	2359	police-civilian encounters leading to search	crime suspects in New York City	-0.0577255	0.014601	-3.95353	2359	1	2357	-0.0811652	-0.0813442	0.0206021	-0.040964	-0.121724	0.0204577	0.000421	-0.0803397	-0.0819908	Hit rate on searches. Hit defined as 1 if weapon found, other contraband found, or firearm found.	New York City Police Department, https://www.nyc.gov/site/nypd/stats/reports-analysis/stopfrisk.page	0	success rate	actual
2019	bad	21st century	law enforcement	police search	effect of race on probability of search, conditional on observable justifications (hit rate)	3334	police-civilian encounters leading to search	crime suspects in New York City	-0.0462497	0.0123124	-3.75635	3334	1	3332	-0.0649376	-0.0650291	0.0173266	-0.031069	-0.0989892	0.0172483	0.000299	-0.0643521	-0.0655231	Hit rate on searches. Hit defined as 1 if weapon found, other contraband found, or firearm found.	New York City Police Department, https://www.nyc.gov/site/nypd/stats/reports-analysis/stopfrisk.page	0	success rate	actual
2020	bad	21st century	law enforcement	police search	effect of race on probability of search, conditional on observable justifications (hit rate)	2622	police-civilian encounters leading to search	crime suspects in New York City	-0.0690312	0.0154686	-4.46267	2622	1	2620	-0.0868559	-0.0870753	0.0195403	-0.0487762	-0.125374	0.0193855	0.000379	-0.0861139	-0.0875979	Hit rate on searches. Hit defined as 1 if weapon found, other contraband found, or firearm found.	New York City Police Department, https://www.nyc.gov/site/nypd/stats/reports-analysis/stopfrisk.page	0	success rate	actual
2021	bad	21st century	law enforcement	police search	effect of race on probability of search, conditional on observable justifications (hit rate)	2702	police-civilian encounters leading to search	crime suspects in New York City	-0.102663	0.0161692	-6.3493	2702	1	2700	-0.12129	-0.12189	0.0192486	-0.0841631	-0.159617	0.0189584	0.000365	-0.120575	-0.122005	Hit rate on searches. Hit defined as 1 if weapon found, other contraband found, or firearm found.	New York City Police Department, https://www.nyc.gov/site/nypd/stats/reports-analysis/stopfrisk.page	0	success rate	actual
2022	bad	21st century	law enforcement	police search	effect of race on probability of search, conditional on observable justifications	302384	police-civilian encounters leading to search	crime suspects in California	0.0249975	0.0016882	14.8072	302384	10	302373	0.0269181	0.0269246	0.00181854	0.0304889	0.0233602	0.00181722	3.3e-06	0.0269245	0.0269116	Table 1, regression-adjusted hit rates for stops shows 2ppt bias against Black suspects (lower hit rate) compared to White suspects. 29.8 for White vs 27.3 for Black searches	Andrea Guerrero, William Armaline, Chad Bianco, DJ Criner, John Dobard, Sean Duryee, Lawanda Hawkins, Brian Eric Kennedy, Lily Khadjavi, Manjusha P. Kulkarni, Melanie Ochoa, Rich Randolph, Angela Sierra, Tamani Taylor, Sean Thuilliez, Cha Vang, and Ronaldo Villeda. Ripa board report 2024. Technical report, California Department of Justice, Racial Identity and Profiling Act Advisory Board, 2024. U…	1	success rate	actual
2022	bad	21st century	law enforcement	police search	effect of race on probability of search, conditional on observable justifications (hit rate)	4190	police-civilian encounters leading to search	crime suspects in New York City	-0.089732	0.0135517	-6.62146	4190	1	4188	-0.101786	-0.10214	0.0154543	-0.0718495	-0.13243	0.0152905	0.000236	-0.101323	-0.102249	Hit rate on searches. Hit defined as 1 if weapon found, other contraband found, or firearm found.	New York City Police Department, https://www.nyc.gov/site/nypd/stats/reports-analysis/stopfrisk.page	0	success rate	actual
2023	bad	21st century	law enforcement	police search	effect of race on probability of search, conditional on observable justifications (hit rate)	4385	police-civilian encounters leading to search	crime suspects in New York City	-0.0976332	0.014155	-6.89744	4385	1	4383	-0.103623	-0.103997	0.0151065	-0.0743879	-0.133605	0.0149409	0.000226	-0.103181	-0.104066	Hit rate on searches. Hit defined as 1 if weapon found, other contraband found, or firearm found.	New York City Police Department, https://www.nyc.gov/site/nypd/stats/reports-analysis/stopfrisk.page	0	success rate	actual
1995-1997	bad	Post-Civil Rights era	law enforcement	police search	effect of race on probability of search, conditional on observable justifications (hit rate)	1193	police-civilian encounters leading to search	crime suspects in Trenton NJ	0.0307614	0.0202746	1.51724	1193	1	1191	0.0439216	0.0439499	0.0289886	0.100767	-0.0128676	0.0289083	0.000837	0.0455621	0.0422812	Hit rates suggest anti-black bias. Page 28. 71% of searches were of Black people compared to 29% of White people, using only Black and White searches	Verniero, P. and Zoubek, P. (1999): Interim Report of the state police review team regarding allegations of racial profiling, Trenton: NJ, Attorney Generals Office.	1	success rate	actual
1995-1999	bad	Post-Civil Rights era	law enforcement	police search	effect of race on probability of search, conditional on observable justifications	1465	police-civilian encounters leading to search	crime suspects	-0.03	0.032279	-0.929397	1465	1	1463	-0.0242913	-0.0242961	0.0261533	0.0269644	-0.0755565	0.02612	0.000682	-0.0229538	-0.0256289	Stata ttesti command using data in Table 1. Compare mean Black to mean White guilty rate. 1002 .35 .02 463 .32 .02	Knowles, J., Persico, N., & Todd, P. (2001). Racial bias in motor vehicle searches: Theory and evidence. Journal of political economy, 109(1), 203-229.	1	success rate	actual
2000-2015	bad	21st century	law enforcement	police search	effect of race on probability of search, conditional on observable justifications (hit rate)	81643	police-civilian encounters leading to search	crime suspects in Charlotte, North Carolina	-0.0021764	0.0036556	-0.595361	81643	1	81641	-0.00208	-0.00208	0.00349984	0.00477604	-0.00894335	0.00349978	1.22e-05	-0.00206	-0.00211	Hit rates suggest anti-white bias. 26.8 vs 26.6	Open Policing Project, raw data from Charlotte Police Department, 2000-2015	0	success rate	actual
2001-2023	bad	21st century	law enforcement	police search	effect of race on probability of search, conditional on observable justifications (hit rate)	2298475	police-civilian encounters leading to search	crime suspects in Missouri from state highway patrol	0.0399688	0.0006414	62.3149	2298475	1	2298473	0.0410682	0.0410913	0.0006596	0.0423841	0.0397985	0.000658487	4.34e-07	0.0410691	0.0410674	Hits per race divided by searches per race, aggregated from 2001-2023 using annual report executive summary tables. Suggests anti-Black bias	Missouri Attorney General, Vehicle Stops Report, mulitple years 2001-2023, https://ago.mo.gov/get-help/vehicle-stops-report/, accessed January 28, 2025.	0	success rate	actual
2002-2015	bad	21st century	law enforcement	police search	effect of race on probability of search, conditional on observable justifications (hit rate)	28321	police-civilian encounters leading to search	crime suspects in Raliegh NC	-0.0226069	0.0046605	-4.85075	28321	1	28319	-0.028813	-0.028821	0.00594249	-0.0171737	-0.0404683	0.00593735	3.53e-05	-0.0287439	-0.0288822	Hit rate is higher for Black people, 16 vs 14	Open Policing Project, raw data from Raleigh North Carolina Police Dept, 2002-2015	0	success rate	actual
2005-2020	bad	21st century	law enforcement	police search	effect of race on probability of search, conditional on observable justifications (hit rate)	69023	police-civilian encounters leading to search	State patrol data on crime suspects in CT, IL, NC, RI, SC, TX, WA, and WI.	0.0165072	0.0037381	4.41593	69023	1	69021	0.0168	0.0168	0.00380638	0.0242683	0.00934731	0.00380525	1.45e-05	0.0168	0.0168	Aggregate findings data from findings page of Stanford Open Policing Project, https://openpolicing.stanford.edu/findings/. Downloaded Jan 21, 2025. These are the hit rate data for statewide stops (state patrol)	Pierson, E., Simoiu, C., Overgoor, J., Corbett-Davies, S., Jenson, D., Shoemaker, A., ... & Goel, S. (2020). A large-scale analysis of racial disparities in police stops across the United States. Nature human behaviour, 4(7), 736-745.	1	success rate	actual
2005-2020	bad	21st century	law enforcement	police search	effect of race on probability of search, conditional on observable justifications (hit rate)	37477	police-civilian encounters leading to search	Municipal police data on crime suspects in cities of Plano, Nashville, New Orleans, Philadelphia, San Diego, and San Francisco.	-0.0288114	0.0043032	-6.69534	37938	1	37936	-0.0343551	-0.0343686	0.00513428	-0.0243054	-0.0444318	0.00512809	2.63e-05	-0.0343034	-0.0344067	Aggregate findings data from findings page of Stanford Open Policing Project, https://openpolicing.stanford.edu/findings/. Downloaded Jan 21, 2025. These are the hit rate data for city stops (city level police departments)	Pierson, E., Simoiu, C., Overgoor, J., Corbett-Davies, S., Jenson, D., Shoemaker, A., ... & Goel, S. (2020). A large-scale analysis of racial disparities in police stops across the United States. Nature human behaviour, 4(7), 736-745.	1	success rate	actual
2005-2020	bad	21st century	law enforcement	police search	effect of race on threshold for search, estimated from model using hit rate and search rate	69023	police-civilian encounters leading to search	State patrol data on crime suspects in CT, IL, NC, RI, SC, TX, WA, and WI.	0.0315963	0.0031339	10.0821	69023	1	69021	0.0383	0.0384	0.00380638	0.0458272	0.0309061	0.00380073	1.45e-05	0.0384	0.0383	Aggregate findings data from findings page of Stanford Open Policing Project, https://openpolicing.stanford.edu/findings/. Downloaded Jan 21, 2025. These are the inferred threshold for search results from the authors, which are calculated using complex statistical analysis based on the search and hit rates. These results are not observed, and they make several important assumptions. The authors n…	Pierson, E., Simoiu, C., Overgoor, J., Corbett-Davies, S., Jenson, D., Shoemaker, A., ... & Goel, S. (2020). A large-scale analysis of racial disparities in police stops across the United States. Nature human behaviour, 4(7), 736-745.	1	success rate	actual
2005-2020	bad	21st century	law enforcement	police search	effect of race on threshold for search, estimated from model using hit rate and search rate	37477	police-civilian encounters leading to search	Municipal police data on crime suspects in cities of Plano, Nashville, New Orleans, Philadelphia, San Diego, and San Francisco.	0.0590336	0.0027423	21.527	37938	1	37936	0.109856	0.110301	0.00513428	0.120364	0.100238	0.00507219	2.6e-05	0.109907	0.109805	Aggregate findings data from findings page of Stanford Open Policing Project, https://openpolicing.stanford.edu/findings/. Downloaded Jan 21, 2025. These are the inferred threshold for search results from the authors, which are calculated using complex statistical analysis based on the search and hit rates. These results are not observed, and they make several important assumptions. The authors n…	Pierson, E., Simoiu, C., Overgoor, J., Corbett-Davies, S., Jenson, D., Shoemaker, A., ... & Goel, S. (2020). A large-scale analysis of racial disparities in police stops across the United States. Nature human behaviour, 4(7), 736-745.	1	success rate	actual
2006-2016	bad	21st century	law enforcement	police search	effect of race on probability of search, conditional on observable justifications (hit rate)	11845	police-civilian encounters leading to search	crime suspects in Austin, Texas	-0.0133629	0.007975	-1.6756	11845	1	11843	-0.0153953	-0.0153965	0.00918941	0.00261474	-0.0334077	0.00918645	8.44e-05	-0.0152298	-0.0155607	Hit rates suggest anti-white bias.	Open Policing Project, raw data from Austin Police Department, 2006-2016	0	success rate	actual
2007-2014	bad	21st century	law enforcement	police search	effect of race on probability of search, conditional on observable justifications (hit rate)	93341	police-civilian encounters leading to search	crime suspects in Maryland from state highway patrol	-0.0076635	0.0019619	-3.90616	93341	1	93339	-0.0127845	-0.0127852	0.00327319	-0.00636974	-0.0192006	0.00327262	1.07e-05	-0.0127635	-0.0128055	Hit rates suggest anti-white bias (roughly equal rates of 10%)	Open Policing Project, raw data from Maryland Highway Patrol, 2007-2015	0	success rate	actual
2007-2015	bad	21st century	law enforcement	police search	effect of race on probability of search, conditional on observable justifications (hit rate)	42863	police-civilian encounters leading to search	crime suspects in Massachusetts from state highway patrol	0.0347029	0.0060725	5.71476	42863	1	42861	0.0275932	0.0276002	0.0048303	0.0370676	0.0181328	0.00482651	2.33e-05	0.0276389	0.0275475	Hit rates suggest anti-black bias.	Open Policing Project, raw data from Massachusetts highway patrol, 2007-2015	0	success rate	actual
2009-2014	bad	21st century	law enforcement	police search	effect of race on probability of search, conditional on observable justifications	166816	police-civilian encounters leading to search	crime suspects in Raliegh NC	0.0550983	0.0022771	24.1967	166816	1	166816	0.0591393	0.0592083	0.00244841	0.0640072	0.0544095	0.00243983	5.97e-06	0.059151	0.0591275	Table 1 hit rate differences favors White, suggesting anti-Black discrimination	Simoiu, C., Corbett-Davies, S., & Goel, S. (2017). THE PROBLEM OF INFRA-MARGINALITY IN OUTCOME TESTS FOR DISCRIMINATION. THE ANNALS of APPLIED STATISTICS, 1193-1216.	1	success rate	actual
2009-2016	bad	21st century	law enforcement	police search	effect of race on probability of search, conditional on observable justifications (hit rate)	81027	police-civilian encounters leading to search	crime suspects in New Jersey contacted through state patrol	0.0051368	0.0017798	2.88617	81027	1	81025	0.0101389	0.0101392	0.00351312	0.0170249	0.0032535	0.00351272	1.23e-05	0.0101631	0.0101147	Hit rate for searches is higher for White drivers relative to Black	Open Policing Project, raw data from New Jersey state patrol	0	success rate	actual
2009-2017	bad	21st century	law enforcement	police search	effect of race on probability of search, conditional on observable justifications (hit rate)	106834	police-civilian encounters leading to search	crime suspects in Arizona from state highway patrol	-0.0473223	0.0038088	-12.4245	106834	1	106832	-0.0379851	-0.0380034	0.00305951	-0.0320068	-0.044	0.00305506	9.35e-06	-0.0379668	-0.0380034	Hit rate higher for Black people	Open Policing Project, raw data from Arizona State Highway Patrol, 2009-2017	0	success rate	actual
2010-2015	bad	21st century	law enforcement	police search	effect of race on probability of search, conditional on observable justifications	5358	police-civilian encounters leading to search	crime suspects in Baltimore	0.0225154	0.0067096	3.3557	5358	1	5356	0.0458043	0.0458364	0.0136653	0.0726205	0.0190524	0.0136341	0.000186	0.0461694	0.0454393	Data from page 53-54. Hit rates are lower for Black suspects than non-Black (treated as White here). Data are pooled across vehicle and pedestrian searches	US Department of Justice. "Investigation of the Baltimore city police department." (2016).	0	success rate	actual
2010-2015	bad	21st century	law enforcement	police search	effect of race on probability of charges for failure to obey being dismissed by judge	331764	police-civilian encounters leading to search	crime suspects in Baltimore	0.07	0.0019856	35.2538	331764	1	331762	0.0610915	0.0611677	0.00173615	0.0645706	0.0577648	0.00172967	3e-06	0.0610974	0.0610856	Data from page 53-54. Hit rates are lower for Black suspects than non-Black (treated as White here). Data are pooled across vehicle and pedestrian searches	US Department of Justice. "Investigation of the Baltimore city police department." (2016).	0	success rate	actual
2010-2015	bad	21st century	law enforcement	police search	effect of race on probability of search, conditional on observable justifications (hit rate)	93341	police-civilian encounters leading to search	crime suspects in Vermont from state highway patrol	0.126575	0.0226938	5.57751	3014	1	3012	0.101107	0.101454	0.018224	0.137173	0.0657346	0.0180318	0.000328	0.101751	0.100463	Hit rates suggests anti-Black bias (86 vs 73)	Open Policing Project, raw data from Vermont Highway Patrol, 2010-2015	0	success rate	actual
2012-2014	bad	21st century	law enforcement	police search	effect of race on probability of charges for failure to obey being dismissed by judge	1173	police-civilian encounters leading to search	crime suspects in Ferguson, Missouri	0.0647314	0.0492311	1.31485	1173	1	1171	0.0383952	0.0384141	0.0292353	0.0957152	-0.0188871	0.0291672	0.000852	0.0400644	0.036726	Data from page 65 using vehicles stops	US Department of Justice. "Investigation of the Ferguson Police Department." (2015).	1	success rate	actual
2012-2020	bad	21st century	law enforcement	police search	effect of race on probability of search, conditional on observable justifications (hit rate)	6461	police-civilian encounters leading to search	crime suspects in San Antonio	0.019484	0.0080758	2.41264	6461	1	6459	0.0300064	0.0300154	0.0124437	0.0544052	0.00562571	0.0124306	0.000155	0.0303095	0.0297033	Contraband hit rate on searches. W=10.3; B=8.4, suggesting anti-Black bias	Open Policing Project, raw data from San Antonio Police Department, 2012-2020	0	success rate	actual
2012-2020	bad	21st century	law enforcement	police search	effect of race on probability of search, conditional on observable justifications (hit rate)	93341	police-civilian encounters leading to search	crime suspects in Burlington, Vermont	0.09	0.0534661	1.68331	400	1	398	0.0840779	0.0842769	0.0501886	0.182646	-0.0140927	0.0497087	0.00249	0.0889494	0.0792065	Hit rates suggests anti-Black bias (86 vs 73)	Open Policing Project, raw data from Burlington VT, 2012-2020	0	success rate	actual
2013-2016	bad	21st century	law enforcement	police search	effect of race on probability of search, conditional on observable justifications (hit rate)	3742	police-civilian encounters leading to search	crime suspects in Hartford CT	-0.0048654	0.0039856	-1.22074	3742	1	3740	-0.0199573	-0.01996	0.0163539	0.0120937	-0.0520137	0.0163431	0.000267	-0.0194337	-0.020481	Hit rate is higher for Black people, 1.7% vs 1.2% (suprisingly low for both groups--possible data errors)	Open Policing Project, raw data from Raleigh North Carolina Police Dept, 2002-2015	0	success rate	actual
2013-2017	bad	21st century	law enforcement	police search	effect of race on probability of search, conditional on observable justifications (hit rate)	32424	police-civilian encounters leading to search	crime suspects in Oakland, CA	0.0258996	0.007516	3.44593	32424	1	32422	0.019134	0.0191364	0.00555376	0.0300217	0.00825102	0.00555155	3.08e-05	0.0191945	0.0190736	Hit rate higher for White people	Open Policing Project, raw data from Oakland, California Police Dept, 2013-2016	0	success rate	actual
2013-2018	bad	21st century	law enforcement	police search	effect of race on probability of search, conditional on observable justifications (hit rate)	11155	police-civilian encounters leading to search	crime suspects in San Jose, CA	0.0105568	0.0075278	1.40238	11155	1	11153	0.0132779	0.0132787	0.00946943	0.0318388	-0.00528137	0.00946691	8.96e-05	0.0134536	0.0131022	Hit rate higher for White people	Open Policing Project, raw data from San Jose, California Police Dept, 2013-2018	0	success rate	actual
2016-2023	bad	21st century	law enforcement	police search	effect of race on probability of search, conditional on observable justifications (hit rate)	4637	police-civilian encounters leading to search	crime suspects in Lansing Michigan	-0.0338809	0.0145117	-2.33473	4637	1	4635	-0.0342734	-0.0342868	0.01469	-0.00549437	-0.0630792	0.0146696	0.000215	-0.0338511	-0.0346956	Analysis of actual search data. Black people accounted for 58% of searches of Black and White people conducted between 2016-2023 in Lansing. Hit rate was 3.3 ppt higher for Black adults, suggesting anti-White discrimination	Lansing Open Data, Traffic stops, accessed Jan 24, 2025, available https://data-lansing.opendata.arcgis.com/search?tags=Police	0	success rate	actual
2018-2020	bad	21st century	law enforcement	police search	effect of race on probability of search, conditional on observable justifications (hit rate)	9119	police-civilian encounters leading to search	crime suspects in Chicago	0.0911636	0.0162287	5.61743	9119	1	9117	0.0587302	0.0587979	0.0104736	0.0793262	0.0382695	0.0104364	0.000109	0.0589444	0.058516	Analysis of actual search data. Black people accounted for 94% of searches of Black and White people conducted between 2018-2020 in Chicago. Hit rate was 9 ppt higher for White adults, suggesting anti-Black discrimination	Open Policing Project, data from Chicago	0	success rate	actual
2018-2025	bad	21st century	law enforcement	police search	effect of race on probability of search, conditional on observable justifications (hit rate)	344839	police-civilian encounters leading to search	crime suspects in Los Angeles County, CA	-0.0059413	0.0017596	-3.37651	344839	1	344837	-0.00574981	-0.00574987	0.00170292	-0.00241215	-0.00908759	0.00170286	2.9e-06	-0.00574413	-0.00575549	Analysis of actual search data rom Los Angeles County shows very small anti-White discrimination from higher hit rate (25.1 vs 24.5, for Black White hit rates)	Los Angeles County, https://catalog.data.gov/dataset/lapd-ripa-ab-953-stop-person-detail-from-7-1-2018-to-present	0	success rate	actual
2019-2022	bad	21st century	law enforcement	police search	effect of race on probability of search, conditional on observable justifications (hit rate)	33565	police-civilian encounters leading to search	crime suspects in Washington DC	0.0353041	0.0147644	2.39116	33565	1	33563	0.0130509	0.0130517	0.00545853	0.0237504	0.00235296	0.00545744	2.98e-05	0.0131093	0.0129926	Hit rate is larger for White suspects (51 vs 47)	DC Police Department Open Data, available at https://opendata.dc.gov/ or https://opendata.dc.gov/datasets/1d0cbb1658d54027a54234f6b9bf52bf_45/explore	0	success rate	actual
2023-2024	bad	21st century	law enforcement	police search	effect of race on probability of search, conditional on observable justifications (hit rate)	10370	police-civilian encounters leading to search	crime suspects in Washington DC	0.0211846	0.0256802	0.824939	10370	1	10368	0.0081014	0.00810158	0.0098214	0.0273515	-0.0111484	0.00981981	9.64e-05	0.0082904	0.0079124	Hit rate is larger for White suspects (22.5 vs 20.4); 98% of searches involve Black suspect. 13% of stopped Black people are searched vs 2% of stopped White people.	DC Police Department Open Data, available at https://opendata.dc.gov/ or https://opendata.dc.gov/datasets/5c359f8ebdf24d22a1f840d64c5cc540_41/explore?showTable=true	0	success rate	actual
2001	bad	21st century	law enforcement	police stop	effect of race on probability of arrest, conditional on stop (alternative hit rate)	450366	police-civilian encounters leading to stop	crime suspects in Tennessee	-0.0210016	0.0004833	-43.4546	450366	1	450364	-0.0646168	-0.0647069	0.00149011	-0.0617863	-0.0676275	0.00148389	2.21e-06	-0.0646124	-0.0646211	Arrest rate per stop. Search and stop numbers from appendix tables. Exhibit 4: Statewide Summary of Dispositions of the Stop, by race.	Cohen-Vogel, Dan and Doss, Brian (2002): “Vehicle Stops and Race: A Study and Report in Response to Public Chapter 910 of 2000" Report to Comptroller of the Treasury.	0	success rate	actual
1998-1999	bad	Post-Civil Rights era	law enforcement	police stop	justified arrest, measured as arrests per stop	111074	police-civilian encounters leading to stop	crime suspects	0.0219885	0.0023405	9.39479	111074	1	111072	0.0281782	0.0281856	0.00300055	0.0340667	0.0223046	0.00299814	9e-06	0.0281958	0.0281606	Stops by race (for Black and White) are calculated from Table 1.A.5. Arrest data by race are calculated from "Table I.B.1 Ratio of Stops to Arrests by NYPD Command - January 1998 through March 1999." These two sources were used to contruct a database with three variables: arrests (0/1) and an indicator variable for Black and one for White. A regression of Black on arrest is the model and the univ…	Spitzer, E. (1999), "The New York City Police Department's Stop and Frist Practices," Office of the New York State Attorney General. Available https://ur.ag.ny.gov/sites/default/files/reports/stp_frsk.pdf (accessed Jan 10, 2025).	1	success rate	actual
2000-2015	bad	21st century	law enforcement	police stop	effect of race on probability of stop, conditional on observable justifications (arrest rate)	1382626	police-civilian encounters leading to arrest	crime suspects in Charlotte, North Carolina	-0.0157643	0.000305	-51.6862	1382626	1	1382624	-0.0439141	-0.0439423	0.000850449	-0.0422754	-0.0456092	0.000848808	7.22e-07	-0.0439127	-0.0439155	Arrests per stop suggests anti-white bias	Open Policing Project, raw data from Charlotte Police Department, 2000-2015	0	success rate	actual
2001-2023	bad	21st century	law enforcement	police stop	effect of race on probability of stop, conditional on observable justifications (arrest rate)	31075708	police-civilian encounters leading to arrest	crime suspects in Missouri from state highway patrol	-0.0289999	0.0001217	-238.29	3.12225e+07	1	3.12225e+07	-0.0426067	-0.0426325	0.000178964	-0.0422817	-0.0429832	0.000178639	3.2e-08	-0.0426066	-0.0426067	Arrests per stop by race, aggregated from 2001-2023 using data from various years (2003, 2005-2009, 2010-2016, 2019, 2022, 2023) using data from annual report executive summary tables. The arrest rate was 7.1% for Black adults vs 4.2% for White adults, suggesting White adults are stopped more non-arrestable offenses more frequently. Moreover, all arrests result in "search," so arrest rate compari…	Missouri Attorney General, Vehicle Stops Report, mulitple years 2001-2023, https://ago.mo.gov/get-help/vehicle-stops-report/, accessed January 28, 2025.	0	success rate	actual
2002-2015	bad	21st century	law enforcement	police stop	effect of race on probability of stop, conditional on observable justifications (arrest rate)	744947	police-civilian encounters leading to arrest	crime suspects in Raliegh NC	-0.0071819	0.0003617	-19.856	744947	1	744945	-0.0229993	-0.0230033	0.00115861	-0.0207324	-0.0252742	0.001158	1.34e-06	-0.0229966	-0.0230019	Arrest rate higher for Black people	Open Policing Project, raw data from Raleigh North Carolina Police Dept, 2002-2015	0	success rate	actual
2004-2012	bad	21st century	law enforcement	police stop	effect of race on probability of arrest, conditional on stop (alternative hit rate)	4052868	police-civilian encounters leading to stop	crime suspects in New York City	0.01	0.003	3.33333	4052868	50	4052817	0.00165577	0.00165577	0.000496728	0.00262936	0.000682183	0.000496727	2.47e-07	0.00165625	0.00165529	Arrest or summons rate per stop. Table 6, column 6, fully specified model with suspect characteristics, precinct, time effects.	Fagan, J. (2021). No runs, few hits, and many errors: Street stops, bias, and proactive policing. UCLA L. Rev., 68, 1584.	1	success rate	actual
2007-2014	bad	21st century	law enforcement	police stop	effect of race on probability of stop, conditional on observable justifications (arrest rate)	3060460	police-civilian encounters leading to arrest	crime suspects in Maryland from state highway patrol	-0.0006636	0.000157	-4.22675	3060460	1	3060458	-0.00241609	-0.00241609	0.000571619	-0.00129572	-0.00353646	0.000571616	3.27e-07	-0.00241545	-0.00241673	Arrests per stop suggests anti-white bias	Open Policing Project, raw data from Maryland Highway Patrol, 2007-2015	0	success rate	actual
2007-2015	bad	21st century	law enforcement	police stop	effect of race on probability of stop, conditional on observable justifications (arrest rate)	2880643	police-civilian encounters leading to arrest	crime suspects in Massachusetts from state highway patrol	-0.0124202	0.0002747	-45.2137	2880643	1	2880641	-0.02663	-0.0266363	0.00058919	-0.0254815	-0.0277911	0.000588772	3.47e-07	-0.0266293	-0.0266307	Arrests per stop suggests anti-white bias	Open Policing Project, raw data from Massachusetts highway patrol, 2007-2015	0	success rate	actual
2009-2016	bad	21st century	law enforcement	police stop	effect of race on probability of arrest, conditional on stop (alternative hit rate)	3089014	police-civilian encounters leading to stop	crime suspects in New Jersey contacted through state patrol	-0.0304815	0.0002175	-140.145	3089014	1	3089012	-0.0794861	-0.0796541	0.000568971	-0.0785389	-0.0807693	0.000565376	3.22e-07	-0.0794854	-0.0794867	Arrest rate per stop is higher for Black drivers	Open Policing Project, raw data from New Jersey state patrol	0	success rate	actual
2009-2017	bad	21st century	law enforcement	police stop	effect of race on probability of stop, conditional on observable justifications (arrest rate)	2262096	police-civilian encounters leading to arrest	crime suspects in Arizona from state highway patrol	-0.0416291	0.0007743	-53.7635	2262096	1	2262094	-0.0357236	-0.0357388	0.000664882	-0.0344356	-0.037042	0.000664034	4.42e-07	-0.0357227	-0.0357245	Arrest rate higher for Black people	Open Policing Project, raw data from Arizona State Highway Patrol, 2009-2017	0	success rate	actual
2010-2015	bad	21st century	law enforcement	police stop	effect of race on probability of stop, conditional on observable justifications (arrest rate)	3060460	police-civilian encounters leading to arrest	crime suspects in Vermont from state highway patrol	-0.0096096	0.0014602	-6.58102	270070	1	270068	-0.0126626	-0.0126632	0.00192426	-0.00889168	-0.0164348	0.00192395	3.7e-06	-0.0126553	-0.0126698	Arrest rate suggests anti-White bias	Open Policing Project, raw data from Vermont Highway Patrol, 2010-2015	0	success rate	actual
2012-2020	bad	21st century	law enforcement	police stop	effect of race on probability of stop, conditional on observable justifications (arrest rate)	621992	police-civilian encounters leading to arrest	crime suspects in San Antonio	-0.0006246	0.000166	-3.76265	621992	1	621990	-0.00477087	-0.0047709	0.00126797	-0.00228568	-0.00725612	0.00126794	1.61e-06	-0.00476771	-0.00477402	Arrests per stop by race. B=0.33% vs W=0.27%	Open Policing Project, raw data from San Antonio Police Department, 2012-2020	0	success rate	actual
2012-2020	bad	21st century	law enforcement	police stop	effect of race on probability of stop, conditional on observable justifications (arrest rate)	3060460	police-civilian encounters leading to arrest	crime suspects in Burlington, Vermont	-0.0038447	0.0019854	-1.93649	32727	1	32725	-0.0107041	-0.0107045	0.00552798	0.000130351	-0.0215393	0.00552718	3.06e-05	-0.0106442	-0.010764	Arrest rate suggests anti-White bias	Open Policing Project, raw data from Burlington VT, 2012-2020	0	success rate	actual
2013-2016	bad	21st century	law enforcement	police stop	effect of race on probability of stop, conditional on observable justifications (arrest rate)	13158	police-civilian encounters leading to arrest	crime suspects in Hartford CT	-0.0127774	0.0031668	-4.0348	13158	1	13156	-0.0351553	-0.0351698	0.00871876	-0.0180811	-0.0522586	0.00870732	7.59e-05	-0.0350066	-0.0353041	Arrest rate higher for Black people	Open Policing Project, raw data from Raleigh North Carolina Police Dept, 2002-2015	0	success rate	actual
2013-2017	bad	21st century	law enforcement	police stop	effect of race on probability of stop, conditional on observable justifications (arrest rate)	94553	police-civilian encounters leading to arrest	crime suspects in Oakland, CA	-0.0679319	0.002972	-22.8573	94553	1	94551	-0.0741302	-0.0742665	0.00325214	-0.0678923	-0.0806407	0.00323423	1.05e-05	-0.0741096	-0.0741508	Arrests per stop higher for Black people	Open Policing Project, raw data from Oakland, California Police Dept, 2013-2016	0	success rate	actual
2013-2018	bad	21st century	law enforcement	police stop	effect of race on probability of stop, conditional on observable justifications (arrest rate)	39802	police-civilian encounters leading to arrest	crime suspects in San Jose, CA	-0.0329508	0.0028164	-11.6996	39802	1	39800	-0.0585443	-0.0586113	0.00501261	-0.0487866	-0.068436	0.0049953	2.5e-05	-0.0584952	-0.0585934	Arrests per stop higher for Black people	Open Policing Project, raw data from San Jose, California Police Dept, 2013-2018	0	success rate	actual
2019-2022	bad	21st century	law enforcement	police stop	effect of race on probability of stop, conditional on observable justifications (arrest rate)	240064	police-civilian encounters leading to arrest	crime suspects in Washington DC	-0.187993	0.0023958	-78.4677	240064	1	240062	-0.158136	-0.159474	0.00204098	-0.155474	-0.163474	0.00198993	4.06e-06	-0.158128	-0.158144	Arrest rate per stop is 28% for Black adults vs 9% for White adults	DC Police Department Open Data, available at https://opendata.dc.gov/ or https://opendata.dc.gov/datasets/1d0cbb1658d54027a54234f6b9bf52bf_45/explore	0	success rate	actual
2023-2024	bad	21st century	law enforcement	police stop	effect of race on probability of stop, conditional on observable justifications (arrest rate)	86483	police-civilian encounters leading to arrest	crime suspects in Washington DC	-0.204088	0.0044499	-45.8635	86483	1	86481	-0.154095	-0.155332	0.00340049	-0.148667	-0.161997	0.00331971	1.13e-05	-0.154073	-0.154117	Arrest rate per stop is 30% for Black adults vs 10% for White adults	DC Police Department Open Data, available at https://opendata.dc.gov/ or https://opendata.dc.gov/datasets/5c359f8ebdf24d22a1f840d64c5cc540_41/explore?showTable=true	0	success rate	actual
1996-2011	bad	21st century	law enforcement	police use-of-force	Effect of race on use of force	59668	police-civilian encounters	crime suspects				59668		59667	0.270309	0.277197	0.00409393	0.285221	0.269173	0.00379473	1.55e-05	0.270339	0.270279	Table 2, row L, national data. Converted odds ratio to log odds, Cohen's D, and r	Fryer Jr, R. G. (2019). An empirical analysis of racial differences in police use of force. Journal of Political Economy, 127(3), 1210-1261.	1	model-adjusted	actual
2003-2013	bad	21st century	law enforcement	police use-of-force	Effect of race on use of force	4927962	police-civilian encounters	crime suspects				4927962		4927961	0.0437094	0.0437373	0.000450471	0.0446202	0.0428543	0.00044961	2.03e-07	0.0437098	0.043709	Table 2, row G, NYPD data. Converted odds ratio to log odds, Cohen's D, and r	Fryer Jr, R. G. (2019). An empirical analysis of racial differences in police use of force. Journal of Political Economy, 127(3), 1210-1261.	1	model-adjusted	actual
1974-1978	bad	Post-Civil Rights era	law enforcement	police use-of-lethal-force	Effect of race on use of lethal force conditional on suspect firing at police	128	police-civilian encounters involing officer shooting	crime suspects in Los Angeles, CA	-0.0598421	0.0696586	-0.859077	128	1	126	-0.0763095	-0.0764581	0.0894427	0.0988496	-0.251766	0.0882189	0.0078	-0.0610264	-0.0915927	Table 1. Population arrests, attacks on officers, and shot fatally by race, 1974-1978. Calculation examines what percentage of suspects killed by the police, shot at the police? This uses the number who shot at police as the numerator and the number shot by the police as the denominator. It is 84% for Black suspects vs 78% for White suspects, suggesting White suspects were more likely to be shot …	Meyer, M. W. (1980). Police shootings at minorities: The case of Los Angeles. The Annals of the American Academy of Political and Social Science, 452(1), 98-110.	1	success rate	actual
2000-2015	bad	21st century	law enforcement	police use-of-lethal-force	Effect of race on use of lethal force	5994	police-civilian encounters	crime suspects				5994		5993	-0.0761571	-0.0763049	0.0129196	-0.0509824	-0.101627	0.0128426	0.000166	-0.075832	-0.0764822	Table 4, row f, column 7. Converted odds ratio to log odds, Cohen's D, and r	Fryer Jr, R. G. (2019). An empirical analysis of racial differences in police use of force. Journal of Political Economy, 127(3), 1210-1261.	1	model-adjusted	actual
1958	bad	Jim Crow	law enforcement	punishment	Effect of Black race on length of prison sentence	3644	Criminal convicts in Texas	Criminal convicts				3644			0.00842481	0.00842501	0.0165726	0.0409072	-0.0240572	0.0165668	0.000274	0.00896271	0.0078869	Data from Table 4. Coefficients were coded as negative if favored Black convicts and positive if favored White convicts. The weighted average correlation coefficient (from paper) was calculated using the number of convicts. Results showed longer sentences for Black people in burglary but shorter for murder or rape.	Bullock, H. A. (1961). Significance of the racial factor in the length of prison sentences. J. Crim. L. Criminology & Police Sci., 52, 411.	1	model-adjusted	actual
1930-1939	bad	Jim Crow	law enforcement	punishment	Effect of Black race on execution for homicide	100000	All U.S. persons convicted of homicide	homicide defendants	-0.0014	0.0022147	-0.63214	100000	1	99998	-0.00199902	-0.00199902	0.00316233	0.00419914	-0.00819718	0.00316228	1e-05	-0.00197942	-0.00201862	Data from Table 4 and 5 showing executions per homicide by race. Higher rate for White people suggests anti-White prejudice.	Kleck, G. (1981). Racial discrimination in criminal sentencing: A critical evaluation of the evidence with additional evidence on the death penalty. American Sociological Review, 783-805.	1	success rate	actual
1940-1949	bad	Jim Crow	law enforcement	punishment	Effect of Black race on execution for homicide	80000	All U.S. persons convicted of homicide	homicide defendants	0.013	0.0024122	5.38927	80000	1	79998	0.0190507	0.019053	0.0035356	0.0259828	0.0121233	0.00353427	1.25e-05	0.0190752	0.0190262	Data from Table 4 and 5 showing executions per homicide by race. Higher rate for Black people suggests anti-Black prejudice.	Kleck, G. (1981). Racial discrimination in criminal sentencing: A critical evaluation of the evidence with additional evidence on the death penalty. American Sociological Review, 783-805.	1	success rate	actual
1950-1967	bad	Jim Crow	law enforcement	punishment	Effect of Black race on execution for homicide	136000	All U.S. persons convicted of homicide	homicide defendants	-0.0136912	0.0012096	-11.3188	136000	1	135998	-0.0306781	-0.0306878	0.00271166	-0.0253729	-0.0360026	0.00270909	7.35e-06	-0.0306637	-0.0306925	Data from Table 4 and 5 showing executions per homicide by race. Higher rate for White people suggests anti-White prejudice.	Kleck, G. (1981). Racial discrimination in criminal sentencing: A critical evaluation of the evidence with additional evidence on the death penalty. American Sociological Review, 783-805.	1	success rate	actual
1990-1994	bad	Post-Civil Rights era	law enforcement	punishment	Black race effect on probability of being held without bail, conditional on predicted risk of violence, drug offense, and flight probability	12695	Adults charged with crimes awaiting trial in New York City	bail applicants	1.23	4.33	0.284065	12695	1	12693	0.00252135	0.00252136	0.00887636	0.019919	-0.0148763	0.00887561	7.88e-05	0.00267575	0.00236696	Data are from Table 10	McIntyre, F., & Baradaran, S. (2013). Race, prediction, and pretrial detention. Journal of Empirical Legal Studies, 10(4), 741-770.	1	success rate	actual
1990-1998	good	Post-Civil Rights era	law enforcement	punishment	Black race effect on having charged dismissed, indicating excessive arrests	25162	Criminal offenders	felony defendants in state courts	0.007	0.004	1.75	58751	6	58744	0.00722013	0.00722026	0.00412576	0.0153067	-0.000866226	0.00412547	1.7e-05	0.00725349	0.00718677	Results from Table 6, column 4, all crimes. R=0.017 for column 1, high discretion crimes	Tomic, A., & Hakes, J. K. (2008). Case dismissed: Police discretion and racial differences in dismissals of felony charges. American law and economics review, 10(1), 110-141.	1	model-adjusted	actual
1990-2006	bad	21st century	law enforcement	punishment	Black race effect on bail amount	49803	Adults charged with crimes awaiting trial in New York City	bail applicants	-0.07	5.52	-0.0126812	49803	1	49801	-5.68e-05	-5.68e-05	0.00448111	0.00872614	-0.00883979	0.00448102	2.01e-05	-1.75e-05	-9.62e-05	Data are from Table 11	McIntyre, Frank, and Shima Baradaran. 2013. “Race, Prediction, and Pretrial Detention.” Journal of Empirical Legal Studies 10 (4): 741–70	1	success rate	actual
1996-2000	bad	Post-Civil Rights era	law enforcement	punishment	Black race effect on probability of being held without bail, conditional on predicted risk of violence, drug offense, and flight probability	16132	Adults charged with crimes awaiting trial in New York City	bail applicants	-0.13	3.76	-0.0345745	16132	1	16130	-0.000272231	-0.000272231	0.00787402	0.0151608	-0.0157053	0.00787353	6.2e-05	-0.00015073	-0.000393733	Data are from Table 10	McIntyre, Frank, and Shima Baradaran. 2013. “Race, Prediction, and Pretrial Detention.” Journal of Empirical Legal Studies 10 (4): 741–70	1	success rate	actual
1998-2003	good	21st century	law enforcement	punishment	Black race effect on reduction of sentence from recommended standard	137087	Criminal offenders	Convicted criminals in federal court	-0.0115	0.0055	-2.13333	137087	21	137065	-0.0057622	-0.00576226	0.00270089	-0.000468521	-0.011056	0.00270078	7.29e-06	-0.0057479	-0.0057765	Table 1, adjusted estimates from column 1. I took the mean for men and women to get pooled estimates.	McConnell, B., & Rasul, I. (2018, May). Racial and ethnic sentencing differentials in the federal criminal justice system. In AEA Papers and Proceedings (Vol. 108, pp. 241-245). 2014 Broadway, Suite 305, Nashville, TN 37203: American Economic Association.	1	model-adjusted	actual
1998-2003	bad	21st century	law enforcement	punishment	Black race effect on length of prison sentence	137087	Criminal offenders	Convicted criminals in federal court	2.66	0.389	6.41887	137087	21	137065	0.0173353	0.017337	0.00270089	0.0226307	0.0120432	0.00270006	7.29e-06	0.0173495	0.017321	Table 1, adjusted estimates from column 3. I took the mean for men and women to get pooled estimates.	McConnell, B., & Rasul, I. (2018, May). Racial and ethnic sentencing differentials in the federal criminal justice system. In AEA Papers and Proceedings (Vol. 108, pp. 241-245). 2014 Broadway, Suite 305, Nashville, TN 37203: American Economic Association.	1	model-adjusted	actual
2002-2006	bad	21st century	law enforcement	punishment	Black race effect on probability of being held without bail, conditional on predicted risk of violence, drug offense, and flight probability	20976	Adults charged with crimes awaiting trial in New York City	bail applicants	0.72	1.51	0.476821	20976	1	20974	0.0032924	0.00329241	0.0069051	0.0168264	-0.0102416	0.00690469	4.77e-05	0.00338584	0.00319896	Data are from Table 10	McIntyre, Frank, and Shima Baradaran. 2013. “Race, Prediction, and Pretrial Detention.” Journal of Empirical Legal Studies 10 (4): 741–70	1	success rate	actual
2005-2015	good	21st century	law enforcement	punishment	Effect of Black race on whether driver is let off with a warning for speeding	2078315	Driver interactions with Florida state highway patrol	Drivers	-0.0213	0.00233	-9.14163	2078315	11	2078303	-0.00634104	-0.00634113	0.000693657	-0.00498156	-0.00770069	0.000693629	4.81e-07	-0.0063401	-0.00634198	Table 2, column 1. Probability of Black driver not getting a ticket for speeding, conditional on being pulled over by a highway patrol officer and driver characteristics	Goncalves, F., & Mello, S. (2021). A few bad apples? Racial bias in policing. American Economic Review, 111(5), 1406-1441.	1	success rate	actual
2006-2014	good	21st century	law enforcement	punishment	Black race effect on probability of release on bail, conditional on risk, as revealed by subsequent offense rate	145314	Adults charged with crimes awaiting trial in Philadelphia and Miami	bail applicants	0.0629895	0.0021063	29.9	145314	1	145312	0.0781967	0.0783567	0.00262332	0.0834984	0.073215	0.00260726	6.84e-06	0.0782101	0.0781833	Data are from Table 1, summary statistics, showing re-arrest rate piror to disposition by race for those released. Standard errors are simulated in hypothetical database matching these statistics. In the absence of discrimination in bail release, these re-arrest rates should be equal. Higher arrest rates for Black suspects suggests judges are more lenient, conditional on risk of offense. This is …	Arnold, D., Dobbie, W., & Yang, C. S. (2018). Racial bias in bail decisions. The Quarterly Journal of Economics, 133(4), 1885-1932.	1	success rate	actual
2008-2013	good	21st century	law enforcement	punishment	Black race effect on probability of release on bail, conditional on risk, as revealed by subsequent offense rate	434201	Adults charged with crimes awaiting trial in New York City	bail applicants	0.0659971	0.0013862	47.61	434201	1	434199	0.0720648	0.0721899	0.0015176	0.0751644	0.0692154	0.00150971	2.29e-06	0.0720693	0.0720603	Data are from Table 1, summary statistics, showing misconduct rate (either re-arrest or failure to appear in court) by race for those released. Standard errors are calculated from hypothetical database, matching the statistics. In the absence of discrimination in bail release, these misconduct rates should be equal. Higher arrest rates for Black suspects suggests judges are more lenient toward Bl…	Dobbie, W., Hull, P., & Arnold, D. (2022). Measuring Racial Discrimination in Bail Decisions. American Economic Review, 112(9).	1	success rate	actual
1973-1995	bad	Post-Civil Rights era	law enforcement	sentencing	whether Black defendents are more or less likely to have sentences reversed by appeals at state or federal court level in death penalty cases	4225	judicial rulings in death penalty cases	defendents facing death penalty	0.0088196	0.0148461	0.594068	4225	1	4223	0.0091413	0.00914155	0.0153901	0.0393061	-0.021023	0.0153852	0.000237	0.00960522	0.00867738	Combine data in Tables 1 and 2 to calculate error rate by race of defendant. It is 37% for White vs 36% for Black defendants, suggesting anti-White discrimination. Note authors use this as evidence of anit-Black discrimination by comparing error rate to race of victim, finding higher error rates for Black defendents if they kill White victims compared to when they kill Black victims. The problem …	Alesina, A., & La Ferrara, E. (2014). A test of racial bias in capital sentencing. American Economic Review, 104(11), 3397-3433.	1	success rate	actual
2002-2004	good	21st century	mate selection	dating	Effect of Black race on probability of wanting another date for White speed daters	3319	dating exchanges	daters	-0.048	0.047	-1.02128	3319	1	3317	-0.0177297	-0.0177316	0.0173657	0.0163052	-0.0517684	0.017355	0.000301	-0.0171393	-0.0183202	Data from Table 6, White estimates of effect of Black candidate are averaged across men and women	Fisman, R., Iyengar, S. S., Kamenica, E., & Simonson, I. (2008). Racial preferences in dating. The Review of Economic Studies, 75(1), 117-132.	1	model-adjusted	actual
2002-2004	good	21st century	mate selection	dating	Effect of White race on probability of wanting another date for Black speed daters	312	dating exchanges	daters	-0.168	0.129	-1.30233	312	1	310	-0.0737656	-0.0738998	0.056888	0.0376007	-0.1854	0.0563962	0.00319	-0.0675077	-0.0800235	Data from Table 6, Black estimates of effect of White candidate are averaged across men and women	Fisman, R., Iyengar, S. S., Kamenica, E., & Simonson, I. (2008). Racial preferences in dating. The Review of Economic Studies, 75(1), 117-132.	1	model-adjusted	actual
1958	good	Jim Crow	mate selection	marriage evaluation	Approval of Black-White marriage	4995	White adults asked to consider hypothetical marriage candidate	romantic partners	-0.94	0.0008	-1175	100000	1	99998	-0.965641	-2.02335	0.00316233	-2.01715	-2.02955	0.000213574	6.75e-07	-0.96564	-0.965642	Uses survey alogorithm to create pseudo-database from the survey data. Database assumes 100,000 marriage candidates are being rated as acceptable or not. Of these 80% are White to match the approximate relative White share of population. The percent of Black candidates rated as acceptable equals one minus the discrimination rate (e.g 1 - 0.94 in 1958 or 6%). All White candidates are deemed accept…	Gallup Organization	0	self-reported discrimination	actual	do you approve or disapprove of marriages between white and colored people?
1968	good	Post-Civil Rights era	mate selection	marriage evaluation	Approval of Black-White marriage	4608	White adults asked to consider hypothetical marriage candidate	romantic partners	-0.73	0.0016	-456.25	100000	1	99998	-0.821889	-1.16261	0.00316233	-1.15641	-1.16881	0.00102616	3.24e-06	-0.821883	-0.821896	Uses survey alogorithm to create pseudo-database from the survey data. Database assumes 100,000 marriage candidates are being rated as acceptable or not. Of these 80% are White to match the approximate relative White share of population. The percent of Black candidates rated as acceptable equals one minus the discrimination rate (e.g 1 - 0.94 in 1958 or 6%). All White candidates are deemed accept…	Gallup Organization	0	self-reported discrimination	actual	do you approve or disapprove of marriage between--whites and non-whites?
1972	good	Post-Civil Rights era	mate selection	marriage evaluation	Approval of Black-White marriage	9387	White adults asked to consider hypothetical marriage candidate	romantic partners	-0.6	0.0017	-352.941	100000	1	99998	-0.744785	-0.96114	0.00316233	-0.954942	-0.967338	0.00140815	4.45e-06	-0.744776	-0.744794	Uses survey alogorithm to create pseudo-database from the survey data. Database assumes 100,000 marriage candidates are being rated as acceptable or not. Of these 80% are White to match the approximate relative White share of population. The percent of Black candidates rated as acceptable equals one minus the discrimination rate (e.g 1 - 0.94 in 1958 or 6%). All White candidates are deemed accept…	Gallup Organization	0	self-reported discrimination	actual	do you approve or disapprove of marriage between: whites and non-whites?
1972	good	Post-Civil Rights era	mate selection	marriage evaluation	Believe there should be laws against Black-White marriage	9387	White adults asked to consider hypothetical marriage candidate	romantic partners	-0.38	0.0017	-223.529	100000	1	99998	-0.577221	-0.658285	0.00316233	-0.652087	-0.664483	0.00210867	6.67e-06	-0.577208	-0.577234	Uses survey alogorithm to create pseudo-database from the survey data. Database assumes 100,000 marriage candidates are being rated as acceptable or not. Of these 80% are White to match the approximate relative White share of population. The percent of Black candidates rated as acceptable equals one minus the discrimination rate (e.g 1 - 0.94 in 1958 or 6%). All White candidates are deemed accept…	National Opinion Research Center [NORC]	0	self-reported discrimination	actual	do you think there should be laws against marriages between (negroes/blacks) and whites?
1973	good	Post-Civil Rights era	mate selection	marriage evaluation	Believe there should be laws against Black-White marriage	4512	White adults asked to consider hypothetical marriage candidate	romantic partners	-0.37	0.0017	-217.647	100000	1	99998	-0.566958	-0.643028	0.00316233	-0.63683	-0.649226	0.0021458	6.79e-06	-0.566945	-0.566971	Uses survey alogorithm to create pseudo-database from the survey data. Database assumes 100,000 marriage candidates are being rated as acceptable or not. Of these 80% are White to match the approximate relative White share of population. The percent of Black candidates rated as acceptable equals one minus the discrimination rate (e.g 1 - 0.94 in 1958 or 6%). All White candidates are deemed accept…	National Opinion Research Center [NORC]	0	self-reported discrimination	actual	do you think there should be laws against marriages between (negroes/blacks) and whites?
1974	good	Post-Civil Rights era	mate selection	marriage evaluation	Believe there should be laws against Black-White marriage	4452	White adults asked to consider hypothetical marriage candidate	romantic partners	-0.34	0.0017	-200	100000	1	99998	-0.534526	-0.596461	0.00316233	-0.590263	-0.602659	0.00225877	7.14e-06	-0.534512	-0.53454	Uses survey alogorithm to create pseudo-database from the survey data. Database assumes 100,000 marriage candidates are being rated as acceptable or not. Of these 80% are White to match the approximate relative White share of population. The percent of Black candidates rated as acceptable equals one minus the discrimination rate (e.g 1 - 0.94 in 1958 or 6%). All White candidates are deemed accept…	National Opinion Research Center [NORC]	0	self-reported discrimination	actual	do you think there should be laws against marriages between (negroes/blacks) and whites?
1975	good	Post-Civil Rights era	mate selection	marriage evaluation	Believe there should be laws against Black-White marriage	4470	White adults asked to consider hypothetical marriage candidate	romantic partners	-0.38	0.0017	-223.529	100000	1	99998	-0.577221	-0.658285	0.00316233	-0.652087	-0.664483	0.00210867	6.67e-06	-0.577208	-0.577234	Uses survey alogorithm to create pseudo-database from the survey data. Database assumes 100,000 marriage candidates are being rated as acceptable or not. Of these 80% are White to match the approximate relative White share of population. The percent of Black candidates rated as acceptable equals one minus the discrimination rate (e.g 1 - 0.94 in 1958 or 6%). All White candidates are deemed accept…	National Opinion Research Center [NORC]	0	self-reported discrimination	actual	do you think there should be laws against marriages between (negroes/blacks) and whites?
1976	good	Post-Civil Rights era	mate selection	marriage evaluation	Believe there should be laws against Black-White marriage	4497	White adults asked to consider hypothetical marriage candidate	romantic partners	-0.32	0.0016	-200	100000	1	99998	-0.534526	-0.596461	0.00316233	-0.590263	-0.602659	0.00225877	7.14e-06	-0.534512	-0.53454	Uses survey alogorithm to create pseudo-database from the survey data. Database assumes 100,000 marriage candidates are being rated as acceptable or not. Of these 80% are White to match the approximate relative White share of population. The percent of Black candidates rated as acceptable equals one minus the discrimination rate (e.g 1 - 0.94 in 1958 or 6%). All White candidates are deemed accept…	National Opinion Research Center [NORC]	0	self-reported discrimination	actual	do you think there should be laws against marriages between (negroes/blacks) and whites?
1977	good	Post-Civil Rights era	mate selection	marriage evaluation	Believe there should be laws against Black-White marriage	4590	White adults asked to consider hypothetical marriage candidate	romantic partners	-0.28	0.0016	-175	100000	1	99998	-0.484204	-0.528461	0.00316233	-0.522263	-0.534659	0.00242088	7.66e-06	-0.484189	-0.484219	Uses survey alogorithm to create pseudo-database from the survey data. Database assumes 100,000 marriage candidates are being rated as acceptable or not. Of these 80% are White to match the approximate relative White share of population. The percent of Black candidates rated as acceptable equals one minus the discrimination rate (e.g 1 - 0.94 in 1958 or 6%). All White candidates are deemed accept…	National Opinion Research Center (NORC)	0	self-reported discrimination	actual	do you think there should be laws against marriages between (negroes/blacks) and whites?
1978	good	Post-Civil Rights era	mate selection	marriage evaluation	Approval of Black-White marriage	4665	White adults asked to consider hypothetical marriage candidate	romantic partners	-0.54	0.0018	-300	100000	1	99998	-0.688251	-0.844625	0.00316233	-0.838426	-0.850823	0.00166435	5.26e-06	-0.688241	-0.688261	Uses survey alogorithm to create pseudo-database from the survey data. Database assumes 100,000 marriage candidates are being rated as acceptable or not. Of these 80% are White to match the approximate relative White share of population. The percent of Black candidates rated as acceptable equals one minus the discrimination rate (e.g 1 - 0.94 in 1958 or 6%). All White candidates are deemed accept…	Gallup Organization	0	self-reported discrimination	actual	do you approve or disapprove of marriage between: whites and non-whites?
1980	good	Post-Civil Rights era	mate selection	marriage evaluation	Believe there should be laws against Black-White marriage	4404	White adults asked to consider hypothetical marriage candidate	romantic partners	-0.29	0.0016	-181.25	100000	1	99998	-0.497277	-0.545681	0.00316233	-0.539483	-0.55188	0.00238031	7.53e-06	-0.497262	-0.497291	Uses survey alogorithm to create pseudo-database from the survey data. Database assumes 100,000 marriage candidates are being rated as acceptable or not. Of these 80% are White to match the approximate relative White share of population. The percent of Black candidates rated as acceptable equals one minus the discrimination rate (e.g 1 - 0.94 in 1958 or 6%). All White candidates are deemed accept…	National Opinion Research Center [NORC]	0	self-reported discrimination	actual	do you think there should be laws against marriages between (negroes/blacks) and whites?
1982	good	Post-Civil Rights era	mate selection	marriage evaluation	Believe there should be laws against Black-White marriage	9036	White adults asked to consider hypothetical marriage candidate	romantic partners	-0.29	0.0016	-181.25	100000	1	99998	-0.497277	-0.545681	0.00316233	-0.539483	-0.55188	0.00238031	7.53e-06	-0.497262	-0.497291	Uses survey alogorithm to create pseudo-database from the survey data. Database assumes 100,000 marriage candidates are being rated as acceptable or not. Of these 80% are White to match the approximate relative White share of population. The percent of Black candidates rated as acceptable equals one minus the discrimination rate (e.g 1 - 0.94 in 1958 or 6%). All White candidates are deemed accept…	National Opinion Research Center [NORC]	0	self-reported discrimination	actual	do you think there should be laws against marriages between (negroes/blacks) and whites?
1982	good	Post-Civil Rights era	mate selection	marriage evaluation	Approval of Black-White marriage	9036	White adults asked to consider hypothetical marriage candidate	romantic partners	-0.36	0.0017	-211.765	100000	1	99998	-0.556424	-0.627639	0.00316233	-0.62144	-0.633837	0.00218322	6.9e-06	-0.556411	-0.556438	Uses survey alogorithm to create pseudo-database from the survey data. Database assumes 100,000 marriage candidates are being rated as acceptable or not. Of these 80% are White to match the approximate relative White share of population. The percent of Black candidates rated as acceptable equals one minus the discrimination rate (e.g 1 - 0.94 in 1958 or 6%). All White candidates are deemed accept…	National Opinion Research Center [NORC]	0	self-reported discrimination	actual	now, thinking about ten years ago, that is in 1972, did you then think there should be laws against marriages between (negroes/ blacks) and whites?
1983	good	Post-Civil Rights era	mate selection	marriage evaluation	Approval of Black-White marriage	8241	White adults asked to consider hypothetical marriage candidate	romantic partners	-0.26	0.0016	-162.5	100000	1	99998	-0.457059	-0.493588	0.00316233	-0.48739	-0.499786	0.00250168	7.91e-06	-0.457044	-0.457075	Uses survey alogorithm to create pseudo-database from the survey data. Database assumes 100,000 marriage candidates are being rated as acceptable or not. Of these 80% are White to match the approximate relative White share of population. The percent of Black candidates rated as acceptable equals one minus the discrimination rate (e.g 1 - 0.94 in 1958 or 6%). All White candidates are deemed accept…	Minneapolis Tribune	0	self-reported discrimination	actual	(please tell me whether you approve or disapprove of the following action?)...interracial dating and marriage between blacks and whites....strongly approve, mildly approve, mildly disapprove, strongly disapprove
1983	good	Post-Civil Rights era	mate selection	marriage evaluation	Approval of Black-White marriage	8241	White adults asked to consider hypothetical marriage candidate	romantic partners	-0.5	0.0018	-277.778	100000	1	99998	-0.659958	-0.79274	0.00316233	-0.786542	-0.798938	0.00178497	5.64e-06	-0.659947	-0.659969	Uses survey alogorithm to create pseudo-database from the survey data. Database assumes 100,000 marriage candidates are being rated as acceptable or not. Of these 80% are White to match the approximate relative White share of population. The percent of Black candidates rated as acceptable equals one minus the discrimination rate (e.g 1 - 0.94 in 1958 or 6%). All White candidates are deemed accept…	Gallup Organization	0	self-reported discrimination	actual	do you approve or disapprove of marriage between blacks and whites?
1984	good	Post-Civil Rights era	mate selection	marriage evaluation	Believe there should be laws against Black-White marriage	4419	White adults asked to consider hypothetical marriage candidate	romantic partners	-0.24	0.0015	-160	100000	1	99998	-0.45147	-0.486545	0.00316233	-0.480347	-0.492743	0.00251774	7.96e-06	-0.451454	-0.451485	Uses survey alogorithm to create pseudo-database from the survey data. Database assumes 100,000 marriage candidates are being rated as acceptable or not. Of these 80% are White to match the approximate relative White share of population. The percent of Black candidates rated as acceptable equals one minus the discrimination rate (e.g 1 - 0.94 in 1958 or 6%). All White candidates are deemed accept…	National Opinion Research Center [NORC]	0	self-reported discrimination	actual	do you think there should be laws against marriages between (negroes/blacks) and whites?
1985	good	Post-Civil Rights era	mate selection	marriage evaluation	Believe there should be laws against Black-White marriage	4602	White adults asked to consider hypothetical marriage candidate	romantic partners	-0.25	0.0015	-166.667	100000	1	99998	-0.466256	-0.505276	0.00316233	-0.499077	-0.511474	0.00247483	7.83e-06	-0.466241	-0.466271	Uses survey alogorithm to create pseudo-database from the survey data. Database assumes 100,000 marriage candidates are being rated as acceptable or not. Of these 80% are White to match the approximate relative White share of population. The percent of Black candidates rated as acceptable equals one minus the discrimination rate (e.g 1 - 0.94 in 1958 or 6%). All White candidates are deemed accept…	National Opinion Research Center [NORC]	0	self-reported discrimination	actual	do you think there should be laws against marriages between (negroes/black) and whites?
1986	good	Post-Civil Rights era	mate selection	marriage evaluation	Approval of Black-White marriage	6564	White adults asked to consider hypothetical marriage candidate	romantic partners	-0.23	0.0015	-153.333	100000	1	99998	-0.436302	-0.467654	0.00316233	-0.461456	-0.473852	0.00256032	8.1e-06	-0.436286	-0.436318	Uses survey alogorithm to create pseudo-database from the survey data. Database assumes 100,000 marriage candidates are being rated as acceptable or not. Of these 80% are White to match the approximate relative White share of population. The percent of Black candidates rated as acceptable equals one minus the discrimination rate (e.g 1 - 0.94 in 1958 or 6%). All White candidates are deemed accept…	Chilton Research Services	0	self-reported discrimination	actual	how about interracial marriage between blacks and whites: would you say you approve or disapprove of that?
1987	good	Post-Civil Rights era	mate selection	marriage evaluation	Believe there should be laws against Black-White marriage	4398	White adults asked to consider hypothetical marriage candidate	romantic partners	-0.23	0.0015	-153.333	100000	1	99998	-0.436302	-0.467654	0.00316233	-0.461456	-0.473852	0.00256032	8.1e-06	-0.436286	-0.436318	Uses survey alogorithm to create pseudo-database from the survey data. Database assumes 100,000 marriage candidates are being rated as acceptable or not. Of these 80% are White to match the approximate relative White share of population. The percent of Black candidates rated as acceptable equals one minus the discrimination rate (e.g 1 - 0.94 in 1958 or 6%). All White candidates are deemed accept…	National Opinion Research Center [NORC]	0	self-reported discrimination	actual	do you think there should be laws against marriages between (negroes/black) and whites?
1988	good	Post-Civil Rights era	mate selection	marriage evaluation	Believe there should be laws against Black-White marriage	4443	White adults asked to consider hypothetical marriage candidate	romantic partners	-0.22	0.0015	-146.667	100000	1	99998	-0.420753	-0.448606	0.00316233	-0.442408	-0.454805	0.00260246	8.23e-06	-0.420737	-0.420769	Uses survey alogorithm to create pseudo-database from the survey data. Database assumes 100,000 marriage candidates are being rated as acceptable or not. Of these 80% are White to match the approximate relative White share of population. The percent of Black candidates rated as acceptable equals one minus the discrimination rate (e.g 1 - 0.94 in 1958 or 6%). All White candidates are deemed accept…	National Opinion Research Center [NORC]	0	self-reported discrimination	actual	do you think there should be laws against marriages between (negroes/black) and whites?
1989	good	Post-Civil Rights era	mate selection	marriage evaluation	Approval of Black-White marriage	25119	White adults asked to consider hypothetical marriage candidate	romantic partners	-0.45	0.0018	-250	100000	1	99998	-0.620177	-0.725293	0.00316233	-0.719095	-0.731492	0.00194601	6.15e-06	-0.620165	-0.62019	Uses survey alogorithm to create pseudo-database from the survey data. Database assumes 100,000 marriage candidates are being rated as acceptable or not. Of these 80% are White to match the approximate relative White share of population. The percent of Black candidates rated as acceptable equals one minus the discrimination rate (e.g 1 - 0.94 in 1958 or 6%). All White candidates are deemed accept…	NBC News	0	self-reported discrimination	actual	do you approve or disapprove of marriage between blacks and whites?
1989	good	Post-Civil Rights era	mate selection	marriage evaluation	Believe there should be laws against Black-White marriage	25119	White adults asked to consider hypothetical marriage candidate	romantic partners	-0.3	0.0016202	-185.162	100000	1	99998	-0.505291	-0.556387	0.00316233	-0.550188	-0.562585	0.0023549	7.45e-06	-0.505277	-0.505306	Uses survey alogorithm to create pseudo-database from the survey data. Database assumes 100,000 marriage candidates are being rated as acceptable or not. Of these 80% are White to match the approximate relative White share of population. The percent of Black candidates rated as acceptable equals one minus the discrimination rate (e.g 1 - 0.94 in 1958 or 6%). All White candidates are deemed accept…	National Opinion Research Center [NORC]	0	self-reported discrimination	actual	do you think the law should allow marriage between blacks and whites? ("No" is coded as discriminatory)
1989	good	Post-Civil Rights era	mate selection	marriage evaluation	Believe there should be laws against Black-White marriage	25119	White adults asked to consider hypothetical marriage candidate	romantic partners	-0.18	0.0014	-128.571	100000	1	99998	-0.376642	-0.39614	0.00316233	-0.389942	-0.402338	0.00271369	8.58e-06	-0.376625	-0.376658	Uses survey alogorithm to create pseudo-database from the survey data. Database assumes 100,000 marriage candidates are being rated as acceptable or not. Of these 80% are White to match the approximate relative White share of population. The percent of Black candidates rated as acceptable equals one minus the discrimination rate (e.g 1 - 0.94 in 1958 or 6%). All White candidates are deemed accept…	National Opinion Research Center [NORC]	0	self-reported discrimination	actual	do you think the law should forbid marriage between blacks and whites?
1989	good	Post-Civil Rights era	mate selection	marriage evaluation	Believe there should be laws against Black-White marriage	25119	White adults asked to consider hypothetical marriage candidate	romantic partners	-0.21	0.0014	-150	100000	1	99998	-0.428575	-0.45815	0.00316233	-0.451951	-0.464348	0.00258145	8.16e-06	-0.428559	-0.428591	Uses survey alogorithm to create pseudo-database from the survey data. Database assumes 100,000 marriage candidates are being rated as acceptable or not. Of these 80% are White to match the approximate relative White share of population. The percent of Black candidates rated as acceptable equals one minus the discrimination rate (e.g 1 - 0.94 in 1958 or 6%). All White candidates are deemed accept…	National Opinion Research Center [NORC]	0	self-reported discrimination	actual	do you think there should be laws against marriages between (negroes/black) and whites?
1989	good	Post-Civil Rights era	mate selection	marriage evaluation	Believe there should be laws against Black-White marriage	25119	White adults asked to consider hypothetical marriage candidate	romantic partners	-0.1	0.0011	-90.9091	100000	1	99998	-0.276292	-0.283663	0.00316233	-0.277465	-0.289861	0.00292089	9.24e-06	-0.276274	-0.27631	Uses survey alogorithm to create pseudo-database from the survey data. Database assumes 100,000 marriage candidates are being rated as acceptable or not. Of these 80% are White to match the approximate relative White share of population. The percent of Black candidates rated as acceptable equals one minus the discrimination rate (e.g 1 - 0.94 in 1958 or 6%). All White candidates are deemed accept…	NBC News	0	self-reported discrimination	actual	do you think there should be laws against marriages between blacks and whites?
1990	good	Post-Civil Rights era	mate selection	marriage evaluation	Believe there should be laws against Black-White marriage	4116	White adults asked to consider hypothetical marriage candidate	romantic partners	-0.19	0.0014	-135.714	100000	1	99998	-0.394384	-0.416981	0.00316233	-0.410783	-0.42318	0.00267043	8.44e-06	-0.394368	-0.394401	Uses survey alogorithm to create pseudo-database from the survey data. Database assumes 100,000 marriage candidates are being rated as acceptable or not. Of these 80% are White to match the approximate relative White share of population. The percent of Black candidates rated as acceptable equals one minus the discrimination rate (e.g 1 - 0.94 in 1958 or 6%). All White candidates are deemed accept…	National Opinion Research Center (NORC)	0	self-reported discrimination	actual	do you think there should be laws against marriages between (negroes/black) and whites?
1991	good	Post-Civil Rights era	mate selection	marriage evaluation	Approval of Black-White marriage	7521	White adults asked to consider hypothetical marriage candidate	romantic partners	-0.42	0.0017	-247.059	100000	1	99998	-0.615657	-0.717981	0.00316233	-0.711783	-0.724179	0.00196368	6.21e-06	-0.615645	-0.615669	Uses survey alogorithm to create pseudo-database from the survey data. Database assumes 100,000 marriage candidates are being rated as acceptable or not. Of these 80% are White to match the approximate relative White share of population. The percent of Black candidates rated as acceptable equals one minus the discrimination rate (e.g 1 - 0.94 in 1958 or 6%). All White candidates are deemed accept…	Gallup Organization	0	self-reported discrimination	actual	do you approve or disapprove of marriage between blacks and whites?
1991	good	Post-Civil Rights era	mate selection	marriage evaluation	Believe there should be laws against Black-White marriage	7521	White adults asked to consider hypothetical marriage candidate	romantic partners	-0.17	0.0013	-130.769	100000	1	99998	-0.382146	-0.402571	0.00316233	-0.396373	-0.408769	0.00270048	8.54e-06	-0.38213	-0.382163	Uses survey alogorithm to create pseudo-database from the survey data. Database assumes 100,000 marriage candidates are being rated as acceptable or not. Of these 80% are White to match the approximate relative White share of population. The percent of Black candidates rated as acceptable equals one minus the discrimination rate (e.g 1 - 0.94 in 1958 or 6%). All White candidates are deemed accept…	National Opinion Research Center [NORC]	0	self-reported discrimination	actual	do you think there should be laws against marriages between (negroes/black) and whites?
1993	good	Post-Civil Rights era	mate selection	marriage evaluation	Believe there should be laws against Black-White marriage	4818	White adults asked to consider hypothetical marriage candidate	romantic partners	-0.17	0.0013	-130.769	100000	1	99998	-0.382146	-0.402571	0.00316233	-0.396373	-0.408769	0.00270048	8.54e-06	-0.38213	-0.382163	Uses survey alogorithm to create pseudo-database from the survey data. Database assumes 100,000 marriage candidates are being rated as acceptable or not. Of these 80% are White to match the approximate relative White share of population. The percent of Black candidates rated as acceptable equals one minus the discrimination rate (e.g 1 - 0.94 in 1958 or 6%). All White candidates are deemed accept…	National Opinion Research Center [NORC]	0	self-reported discrimination	actual	do you think there should be laws against marriages between (negroes/black) and whites?
1994	good	Post-Civil Rights era	mate selection	marriage evaluation	Believe there should be laws against Black-White marriage	10539	White adults asked to consider hypothetical marriage candidate	romantic partners	-0.14	0.0012	-116.667	100000	1	99998	-0.346131	-0.361041	0.00316233	-0.354843	-0.367239	0.00278343	8.8e-06	-0.346114	-0.346148	Uses survey alogorithm to create pseudo-database from the survey data. Database assumes 100,000 marriage candidates are being rated as acceptable or not. Of these 80% are White to match the approximate relative White share of population. The percent of Black candidates rated as acceptable equals one minus the discrimination rate (e.g 1 - 0.94 in 1958 or 6%). All White candidates are deemed accept…	National Opinion Research Center [NORC]	0	self-reported discrimination	actual	do you think there should be laws against marriages between (negroes/blacks/african-americans) and whites?
1994	good	Post-Civil Rights era	mate selection	marriage evaluation	Approval of Black-White marriage	10539	White adults asked to consider hypothetical marriage candidate	romantic partners	-0.37	0.0017	-217.647	100000	1	99998	-0.566958	-0.643028	0.00316233	-0.63683	-0.649226	0.0021458	6.79e-06	-0.566945	-0.566971	Uses survey alogorithm to create pseudo-database from the survey data. Database assumes 100,000 marriage candidates are being rated as acceptable or not. Of these 80% are White to match the approximate relative White share of population. The percent of Black candidates rated as acceptable equals one minus the discrimination rate (e.g 1 - 0.94 in 1958 or 6%). All White candidates are deemed accept…	Gallup Organization	0	self-reported discrimination	actual	in general, do you approve or disapprove of marriages between blacks and whites?
1995	good	Post-Civil Rights era	mate selection	marriage evaluation	Approval of Black-White marriage	2274	White adults asked to consider hypothetical marriage candidate	romantic partners	-0.34	0.0017	-200	100000	1	99998	-0.534526	-0.596461	0.00316233	-0.590263	-0.602659	0.00225877	7.14e-06	-0.534512	-0.53454	Uses survey alogorithm to create pseudo-database from the survey data. Database assumes 100,000 marriage candidates are being rated as acceptable or not. Of these 80% are White to match the approximate relative White share of population. The percent of Black candidates rated as acceptable equals one minus the discrimination rate (e.g 1 - 0.94 in 1958 or 6%). All White candidates are deemed accept…	Princeton Survey Research Associates	0	self-reported discrimination	actual	do you approve or disapprove of marriage between blacks and whites?
1996	good	Post-Civil Rights era	mate selection	marriage evaluation	Believe there should be laws against Black-White marriage	20994	White adults asked to consider hypothetical marriage candidate	romantic partners	-0.11	0.0011	-100	100000	1	99998	-0.301514	-0.311184	0.00316233	-0.304986	-0.317382	0.00287481	9.09e-06	-0.301496	-0.301532	Uses survey alogorithm to create pseudo-database from the survey data. Database assumes 100,000 marriage candidates are being rated as acceptable or not. Of these 80% are White to match the approximate relative White share of population. The percent of Black candidates rated as acceptable equals one minus the discrimination rate (e.g 1 - 0.94 in 1958 or 6%). All White candidates are deemed accept…	National Opinion Research Center [NORC]	0	self-reported discrimination	actual	do you think there should be laws against marriages between (negroes/blacks/african-americans) and whites?
1997	good	Post-Civil Rights era	mate selection	marriage evaluation	Approval of Black-White marriage	26226	White adults asked to consider hypothetical marriage candidate	romantic partners	-0.22	0.0015	-146.667	100000	1	99998	-0.420753	-0.448606	0.00316233	-0.442408	-0.454805	0.00260246	8.23e-06	-0.420737	-0.420769	Uses survey alogorithm to create pseudo-database from the survey data. Database assumes 100,000 marriage candidates are being rated as acceptable or not. Of these 80% are White to match the approximate relative White share of population. The percent of Black candidates rated as acceptable equals one minus the discrimination rate (e.g 1 - 0.94 in 1958 or 6%). All White candidates are deemed accept…	Princeton Survey Research Associates	0	self-reported discrimination	actual	(please tell me whether you generally approve or disapprove of marriage between people with the following different racial and ethnic backgrounds.) do you approve or disapprove of marriages between...blacks and asians?
1997	good	Post-Civil Rights era	mate selection	marriage evaluation	Approval of Black-White marriage	26226	White adults asked to consider hypothetical marriage candidate	romantic partners	-0.2	0.0014	-142.857	100000	1	99998	-0.411697	-0.437653	0.00316233	-0.431455	-0.443851	0.0026263	8.31e-06	-0.411681	-0.411713	Uses survey alogorithm to create pseudo-database from the survey data. Database assumes 100,000 marriage candidates are being rated as acceptable or not. Of these 80% are White to match the approximate relative White share of population. The percent of Black candidates rated as acceptable equals one minus the discrimination rate (e.g 1 - 0.94 in 1958 or 6%). All White candidates are deemed accept…	Princeton Survey Research Associates	0	self-reported discrimination	actual	(please tell me whether you generally approve or disapprove of marriage between people with the following different racial and ethnic backgrounds.) do you approve or disapprove of marriages between...hispanics and non-hispanic blacks?
1997	good	Post-Civil Rights era	mate selection	marriage evaluation	Approval of Black-White marriage	26226	White adults asked to consider hypothetical marriage candidate	romantic partners	-0.28	0.0016	-175	100000	1	99998	-0.484204	-0.528461	0.00316233	-0.522263	-0.534659	0.00242088	7.66e-06	-0.484189	-0.484219	Uses survey alogorithm to create pseudo-database from the survey data. Database assumes 100,000 marriage candidates are being rated as acceptable or not. Of these 80% are White to match the approximate relative White share of population. The percent of Black candidates rated as acceptable equals one minus the discrimination rate (e.g 1 - 0.94 in 1958 or 6%). All White candidates are deemed accept…	Gallup Organization	0	self-reported discrimination	actual	do you approve or disapprove of marriage between blacks and whites?
1997	good	Post-Civil Rights era	mate selection	marriage evaluation	Approval of Black-White marriage	26226	White adults asked to consider hypothetical marriage candidate	romantic partners	-0.29	0.0016	-181.25	100000	1	99998	-0.497277	-0.545681	0.00316233	-0.539483	-0.55188	0.00238031	7.53e-06	-0.497262	-0.497291	Uses survey alogorithm to create pseudo-database from the survey data. Database assumes 100,000 marriage candidates are being rated as acceptable or not. Of these 80% are White to match the approximate relative White share of population. The percent of Black candidates rated as acceptable equals one minus the discrimination rate (e.g 1 - 0.94 in 1958 or 6%). All White candidates are deemed accept…	Princeton Survey Research Associates	0	self-reported discrimination	actual	please tell me whether you generally approve or disapprove of marriage between people with the following different racial and ethnic backgrounds. do you approve or disapprove of marriages between ...blacks and whites?
1998	good	Post-Civil Rights era	mate selection	marriage evaluation	Approval of Black-White marriage	24633	White adults asked to consider hypothetical marriage candidate	romantic partners	-0.24	0.0015	-160	100000	1	99998	-0.45147	-0.486545	0.00316233	-0.480347	-0.492743	0.00251774	7.96e-06	-0.451454	-0.451485	Uses survey alogorithm to create pseudo-database from the survey data. Database assumes 100,000 marriage candidates are being rated as acceptable or not. Of these 80% are White to match the approximate relative White share of population. The percent of Black candidates rated as acceptable equals one minus the discrimination rate (e.g 1 - 0.94 in 1958 or 6%). All White candidates are deemed accept…	Hart-Teeter Research Companies	0	self-reported discrimination	actual	do you approve or disapprove of marriage between whites and non-whites?
1998	good	Post-Civil Rights era	mate selection	marriage evaluation	Believe there should be laws against Black-White marriage	24633	White adults asked to consider hypothetical marriage candidate	romantic partners	-0.11	0.0011	-100	100000	1	99998	-0.301514	-0.311184	0.00316233	-0.304986	-0.317382	0.00287481	9.09e-06	-0.301496	-0.301532	Uses survey alogorithm to create pseudo-database from the survey data. Database assumes 100,000 marriage candidates are being rated as acceptable or not. Of these 80% are White to match the approximate relative White share of population. The percent of Black candidates rated as acceptable equals one minus the discrimination rate (e.g 1 - 0.94 in 1958 or 6%). All White candidates are deemed accept…	National Opinion Research Center [NORC]	0	self-reported discrimination	actual	do you think there should be laws against marriages between (negroes/blacks/african-americans) and whites?
2000	good	21st century	mate selection	marriage evaluation	Believe there should be laws against Black-White marriage	8451	White adults asked to consider hypothetical marriage candidate	romantic partners	-0.09	0.001	-90	100000	1	99998	-0.273737	-0.280899	0.00316233	-0.274701	-0.287097	0.00292534	9.25e-06	-0.273719	-0.273755	Uses survey alogorithm to create pseudo-database from the survey data. Database assumes 100,000 marriage candidates are being rated as acceptable or not. Of these 80% are White to match the approximate relative White share of population. The percent of Black candidates rated as acceptable equals one minus the discrimination rate (e.g 1 - 0.94 in 1958 or 6%). All White candidates are deemed accept…	National Opinion Research Center [NORC]	0	self-reported discrimination	actual	do you think there should be laws against marriages between (negroes/blacks/african-americans) and whites?
2002	good	21st century	mate selection	marriage evaluation	Approval of Black-White marriage	12375	White adults asked to consider hypothetical marriage candidate	romantic partners	-0.29	0.0016	-181.25	100000	1	99998	-0.497277	-0.545681	0.00316233	-0.539483	-0.55188	0.00238031	7.53e-06	-0.497262	-0.497291	Uses survey alogorithm to create pseudo-database from the survey data. Database assumes 100,000 marriage candidates are being rated as acceptable or not. Of these 80% are White to match the approximate relative White share of population. The percent of Black candidates rated as acceptable equals one minus the discrimination rate (e.g 1 - 0.94 in 1958 or 6%). All White candidates are deemed accept…	Gallup Organization	0	self-reported discrimination	actual	do you generally approve or disapprove of marriage between blacks and whites?
2002	good	21st century	mate selection	marriage evaluation	Believe there should be laws against Black-White marriage	12375	White adults asked to consider hypothetical marriage candidate	romantic partners	-0.1	0.0011	-90.9091	100000	1	99998	-0.276292	-0.283663	0.00316233	-0.277465	-0.289861	0.00292089	9.24e-06	-0.276274	-0.27631	Uses survey alogorithm to create pseudo-database from the survey data. Database assumes 100,000 marriage candidates are being rated as acceptable or not. Of these 80% are White to match the approximate relative White share of population. The percent of Black candidates rated as acceptable equals one minus the discrimination rate (e.g 1 - 0.94 in 1958 or 6%). All White candidates are deemed accept…	National Opinion Research Center [NORC]	0	self-reported discrimination	actual	do you think there should be laws against marriages between (negroes/blacks/african-americans) and whites?
2003	good	21st century	mate selection	marriage evaluation	Approval of Black-White marriage	6006	White adults asked to consider hypothetical marriage candidate	romantic partners	-0.23	0.0015	-153.333	100000	1	99998	-0.436302	-0.467654	0.00316233	-0.461456	-0.473852	0.00256032	8.1e-06	-0.436286	-0.436318	Uses survey alogorithm to create pseudo-database from the survey data. Database assumes 100,000 marriage candidates are being rated as acceptable or not. Of these 80% are White to match the approximate relative White share of population. The percent of Black candidates rated as acceptable equals one minus the discrimination rate (e.g 1 - 0.94 in 1958 or 6%). All White candidates are deemed accept…	Gallup Organization	0	self-reported discrimination	actual	do you generally approve or disapprove of marriage between blacks and whites?
2004	good	21st century	mate selection	marriage evaluation	Approval of Black-White marriage	6750	White adults asked to consider hypothetical marriage candidate	romantic partners	-0.19	0.0014	-135.714	100000	1	99998	-0.394384	-0.416981	0.00316233	-0.410783	-0.42318	0.00267043	8.44e-06	-0.394368	-0.394401	Uses survey alogorithm to create pseudo-database from the survey data. Database assumes 100,000 marriage candidates are being rated as acceptable or not. Of these 80% are White to match the approximate relative White share of population. The percent of Black candidates rated as acceptable equals one minus the discrimination rate (e.g 1 - 0.94 in 1958 or 6%). All White candidates are deemed accept…	Gallup Organization	0	self-reported discrimination	actual	do you approve or disapprove of marriage between blacks and whites?
2007	good	21st century	mate selection	marriage evaluation	Approval of Black-White marriage	10248	White adults asked to consider hypothetical marriage candidate	romantic partners	-0.16	0.0013	-123.077	100000	1	99998	-0.362704	-0.379996	0.00316233	-0.373798	-0.386194	0.00274628	8.68e-06	-0.362687	-0.362721	Uses survey alogorithm to create pseudo-database from the survey data. Database assumes 100,000 marriage candidates are being rated as acceptable or not. Of these 80% are White to match the approximate relative White share of population. The percent of Black candidates rated as acceptable equals one minus the discrimination rate (e.g 1 - 0.94 in 1958 or 6%). All White candidates are deemed accept…	Gallup Organization	0	self-reported discrimination	actual	do you approve or disapprove of marriage between blacks and whites?
2008	good	21st century	mate selection	marriage evaluation	Approval of Black-White marriage	4197	White adults asked to consider hypothetical marriage candidate	romantic partners	-0.17	0.0013	-130.769	100000	1	99998	-0.382146	-0.402571	0.00316233	-0.396373	-0.408769	0.00270048	8.54e-06	-0.38213	-0.382163	Uses survey alogorithm to create pseudo-database from the survey data. Database assumes 100,000 marriage candidates are being rated as acceptable or not. Of these 80% are White to match the approximate relative White share of population. The percent of Black candidates rated as acceptable equals one minus the discrimination rate (e.g 1 - 0.94 in 1958 or 6%). All White candidates are deemed accept…	Princeton Survey Research Associates International	0	self-reported discrimination	actual	do you approve or disapprove of marriage between blacks and whites?
2009	good	21st century	mate selection	marriage evaluation	Approval of Black-White marriage	3600	White adults asked to consider hypothetical marriage candidate	romantic partners	-0.14	0.0012	-116.667	100000	1	99998	-0.346131	-0.361041	0.00316233	-0.354843	-0.367239	0.00278343	8.8e-06	-0.346114	-0.346148	Uses survey alogorithm to create pseudo-database from the survey data. Database assumes 100,000 marriage candidates are being rated as acceptable or not. Of these 80% are White to match the approximate relative White share of population. The percent of Black candidates rated as acceptable equals one minus the discrimination rate (e.g 1 - 0.94 in 1958 or 6%). All White candidates are deemed accept…	Princeton Survey Research Associates International	0	self-reported discrimination	actual	please tell me if you approve or disapprove of marriages between people with the following different racial and ethnic backgrounds. do you approve or disapprove of marriages between...blacks and whites?
2011	good	21st century	mate selection	marriage evaluation	Approval of Black-White marriage	3957	White adults asked to consider hypothetical marriage candidate	romantic partners	-0.11	0.0011	-100	100000	1	99998	-0.301514	-0.311184	0.00316233	-0.304986	-0.317382	0.00287481	9.09e-06	-0.301496	-0.301532	Uses survey alogorithm to create pseudo-database from the survey data. Database assumes 100,000 marriage candidates are being rated as acceptable or not. Of these 80% are White to match the approximate relative White share of population. The percent of Black candidates rated as acceptable equals one minus the discrimination rate (e.g 1 - 0.94 in 1958 or 6%). All White candidates are deemed accept…	Gallup Organization	0	self-reported discrimination	actual	do you approve or disapprove of marriage between blacks and whites?
2013	good	21st century	mate selection	marriage evaluation	Approval of Black-White marriage	16137	White adults asked to consider hypothetical marriage candidate	romantic partners	-0.11	0.0011	-100	100000	1	99998	-0.301514	-0.311184	0.00316233	-0.304986	-0.317382	0.00287481	9.09e-06	-0.301496	-0.301532	Uses survey alogorithm to create pseudo-database from the survey data. Database assumes 100,000 marriage candidates are being rated as acceptable or not. Of these 80% are White to match the approximate relative White share of population. The percent of Black candidates rated as acceptable equals one minus the discrimination rate (e.g 1 - 0.94 in 1958 or 6%). All White candidates are deemed accept…	CBS News	0	self-reported discrimination	actual	do you approve or disapprove of marriage between blacks and whites?
2021	good	21st century	mate selection	marriage evaluation	Approval of Black-White marriage	3021	White adults asked to consider hypothetical marriage candidate	romantic partners	-0.04	0.0007	-57.1429	100000	1	99998	-0.177823	-0.179734	0.00316233	-0.173536	-0.185932	0.0030623	9.68e-06	-0.177804	-0.177842	Uses survey alogorithm to create pseudo-database from the survey data. Database assumes 100,000 marriage candidates are being rated as acceptable or not. Of these 80% are White to match the approximate relative White share of population. The percent of Black candidates rated as acceptable equals one minus the discrimination rate (e.g 1 - 0.94 in 1958 or 6%). All White candidates are deemed accept…	Gallup Organization	0	self-reported discrimination	actual	do you approve or disapprove of marriage between black people and white people?
2003-2010	good	21st century	mate selection	online dating	Dating outreach	8961	online daters	White females outreach to Black men	-0.96	0.172	-5.5814	8961	45	8915	-0.0590099	-0.0590785	0.0105656	-0.0383699	-0.0797871	0.0105276	0.000111212	-0.0587919	-0.0592278	Data from Table A1	Lin, K. H., & Lundquist, J. (2013). Mate selection in cyberspace: The intersection of race, gender, and education. American Journal of Sociology, 119(1), 183-215.	1	model-adjusted	actual
2003-2010	good	21st century	mate selection	online dating	Dating outreach	7977	online daters	White men outreach to Black females	-1.134	0.127	-8.92913	7977	45	7931	-0.0997639	-0.100097	0.0111986	-0.0781477	-0.122046	0.0110857	0.000124121	-0.0995206	-0.100007	Data from Table A1	Lin, K. H., & Lundquist, J. (2013). Mate selection in cyberspace: The intersection of race, gender, and education. American Journal of Sociology, 119(1), 183-215.	1	model-adjusted	actual
2003-2010	good	21st century	mate selection	online dating	Response to dating inquiry	1325340	online daters	White females response to Black men	-0.615	0.0392	-15.6888	1325340	45	1325294	-0.0136268	-0.0136276	0.000868634	-0.0119251	-0.0153301	0.000868472	7.54e-07	-0.0136253	-0.0136282	Data from Table A2	Lin, K. H., & Lundquist, J. (2013). Mate selection in cyberspace: The intersection of race, gender, and education. American Journal of Sociology, 119(1), 183-215.	1	model-adjusted	actual
2003-2010	good	21st century	mate selection	online dating	Response to dating inquiry	567733	online daters	White men response to Black females	-0.282	0.041	-6.87805	567733	45	567687	-0.00912836	-0.00912861	0.00132718	-0.00652734	-0.0117299	0.00132707	1.76e-06	-0.00912491	-0.00913181	Data from Table A2	Lin, K. H., & Lundquist, J. (2013). Mate selection in cyberspace: The intersection of race, gender, and education. American Journal of Sociology, 119(1), 183-215.	1	model-adjusted	actual
1957	good	Jim Crow	retail	access to transportation	Equality of access to public transportation	4602	White adults	passengers	-0.33	0.0017	-194.118	100000	1	99998	-0.523155	-0.580673	0.00316233	-0.574475	-0.586872	0.0022968	7.26e-06	-0.52314	-0.523169	Estimated effect using Survey/audit algorithm. Assumes 80-20 Black White split in population of 100,000.	Gallup Organization	0	self-reported discrimination	actual	the supreme court has also ruled that racial segregation on trains, buses and in public waiting rooms must end. do you approve or disapprove of this ruling?
1992	bad	Post-Civil Rights era	retail	purchase of used car	How race affects sales negotiations for car	306	automobile dealership transactions	consumers	1061.27	142.071	7.47	306	156	150	0.520711	0.577315	0.0574485	0.689914	0.464716	0.0417344	0.0023858	0.525387	0.516035	Results from primary model, shown in Table 2 using dollar values. Results are very similar using ttesti comparison with data from Table 1.	Ayres, I., & Siegelman, P. (1995). Race and gender discrimination in bargaining for a new car. The American Economic Review, 304-321.	1	model-adjusted	actual
1944	good	Jim Crow	retail	restaurant services	Approval of restaurant integregation	50420	White adults asked about approval	consumers	-0.47	0.0018	-261.111	100000	1	99998	-0.636711	-0.752622	0.00316233	-0.746424	-0.75882	0.0018803	5.95e-06	-0.636699	-0.636722	Constructed hypothetical database from summary survey data. Database assumes 100,000 candidates are being rated as acceptable or not. Of these 20% are Black and 80% White. The percent of Black candidates rated as acceptable equals one minus the discrimination rate. All White candidates are deemed acceptable. The model regresses candidate acceptability on Black race.	National Opinion Research Center (NORC)	0	self-reported discrimination	actual	do you think some restaurants in this town should serve both negro and white people?
1944	good	Jim Crow	retail	restaurant services	Approval of restaurant integregation	50420	White adults asked about approval	consumers	-0.42	0.0017	-247.059	100000	1	99998	-0.615657	-0.717981	0.00316233	-0.711783	-0.724179	0.00196368	6.21e-06	-0.615645	-0.615669	Constructed hypothetical database from summary survey data. Database assumes 100,000 candidates are being rated as acceptable or not. Of these 20% are Black and 80% White. The percent of Black candidates rated as acceptable equals one minus the discrimination rate. All White candidates are deemed acceptable. The model regresses candidate acceptability on Black race.	National Opinion Research Center (NORC)	0	self-reported discrimination	actual	do you think you would eat in a restaurant that served both negro and white people?
1944	good	Jim Crow	retail	restaurant services	Approval of restaurant integregation	50420	White adults asked about approval	consumers	-0.1	0.0011	-90.9091	100000	1	99998	-0.276292	-0.283663	0.00316233	-0.277465	-0.289861	0.00292089	9.24e-06	-0.276274	-0.27631	Constructed hypothetical database from summary survey data. Database assumes 100,000 candidates are being rated as acceptable or not. Of these 20% are Black and 80% White. The percent of Black candidates rated as acceptable equals one minus the discrimination rate. All White candidates are deemed acceptable. The model regresses candidate acceptability on Black race.	National Opinion Research Center (NORC)	0	self-reported discrimination	actual	if a negro were sitting at one table (in a restaurant), would you sit at a table next to his?
2009	good	21st century	retail	sale of online product	Effect of revealing Black race on probability of receiving an offer for an ipod device advertised online	1200	online shopper	consumers	-0.064	0.037	-1.72973	1200	15	1184	-0.0502059	-0.0502481	0.0289037	0.00640308	-0.106899	0.0288068	0.000831579	-0.048576	-0.0518357	Anti-black discrimination against online seller	Doleac, J. L., & Stein, L. C. (2013). The visible hand: Race and online market outcomes. The Economic Journal, 123(572), F469-F492.	1	audit	skin color
2009	good	21st century	retail	sale of online product	Effect of revealing Black race on mean offer for ipod advertised online	1200	online shopper	consumers	-5.7	2.76	-2.06522	1200	15	1184	-0.0599113	-0.0599832	0.0289037	-0.003332	-0.116634	0.0287759	0.000830688	-0.0582832	-0.0615395	Anti-black discrimination against online seller	Doleac, J. L., & Stein, L. C. (2013). The visible hand: Race and online market outcomes. The Economic Journal, 123(572), F469-F492.	1	audit	skin color
2016	bad	21st century	transportation	taxi services	How race affects driver acceptance, wait times, travel time, and cancellation risk	1935	passenger interactions with transportation service providers	consumers	0.0578253	0.0465917	1.24111	1935	2	1932	0.0282249	0.0282324	0.0227508	0.072824	-0.0163591	0.0227209	0.000516518	0.0292373	0.0272125	Results are pooled from Black coefficients from model 2 (which includes only relevant controls) for Table 4 (acceptance time), Table 5 (wait time), Table 6 (travel time), and Table 14 (cancellation). Results ignore cases in which discrimination is nearly impossible. For example, Uber did not show profile photo before rider accepted, but Lyft did, so only the estimate from Lyft is shown in Table 4…	Ge, Y., Knittel, C. R., MacKenzie, D., & Zoepf, S. (2020). Racial discrimination in transportation network companies. Journal of Public Economics, 190, 104205.	1	audit	actual
1920	bad	Jim Crow	voting	disenfranchisement policies	How race of potential voters affects state legislation designed to reduce voter turnout	45	state legislatures	voters	5.12739	1.89854	2.70071	45	9	35	0.415278	0.441972	0.154303	0.744407	0.139538	0.124757	0.0185977	0.451729	0.378827	These estimates are not directly provided by Gray and Jenkins but use their data. The coefficient shown is the linear combination of coefficients on the poll tax and number of lynchings in state level models predicting White-Black voter turnout gaps. The model estimates year-specific OLS model predicting White-Black ratio in voter turnout rate for each state. The turnout rate is estimated by coun…	Gray, T. R., & Jenkins, J. A. (2024). Estimating Disenfranchisement in US Elections, 1870–1970. Perspectives on Politics, 1-21.	1	policy	actual
1924	bad	Jim Crow	voting	disenfranchisement policies	How race of potential voters affects state legislation designed to reduce voter turnout	46	state legislatures	voters	0.612292	1.49523	0.409498	46	9	36	0.0680912	0.0681967	0.152499	0.367094	-0.2307	0.14838	0.0218774	0.110971	0.0252114	These estimates are not directly provided by Gray and Jenkins but use their data. The coefficient shown is the linear combination of coefficients on the poll tax and number of lynchings in state level models predicting White-Black voter turnout gaps. The model estimates year-specific OLS model predicting White-Black ratio in voter turnout rate for each state. The turnout rate is estimated by coun…	Gray, T. R., & Jenkins, J. A. (2024). Estimating Disenfranchisement in US Elections, 1870–1970. Perspectives on Politics, 1-21.	1	policy	actual
1928	bad	Jim Crow	voting	disenfranchisement policies	How race of potential voters affects state legislation designed to reduce voter turnout	46	state legislatures	voters	2.27474	1.36238	1.66968	46	9	36	0.268093	0.274808	0.152499	0.573705	-0.024089	0.138357	0.0203996	0.308076	0.22811	These estimates are not directly provided by Gray and Jenkins but use their data. The coefficient shown is the linear combination of coefficients on the poll tax and number of lynchings in state level models predicting White-Black voter turnout gaps. The model estimates year-specific OLS model predicting White-Black ratio in voter turnout rate for each state. The turnout rate is estimated by coun…	Gray, T. R., & Jenkins, J. A. (2024). Estimating Disenfranchisement in US Elections, 1870–1970. Perspectives on Politics, 1-21.	1	policy	actual
1932	bad	Jim Crow	voting	disenfranchisement policies	How race of potential voters affects state legislation designed to reduce voter turnout	44	state legislatures	voters	4.33809	2.25578	1.92309	44	9	34	0.313213	0.324104	0.156174	0.630205	0.0180034	0.137538	0.0207346	0.353853	0.272573	These estimates are not directly provided by Gray and Jenkins but use their data. The coefficient shown is the linear combination of coefficients on the poll tax and number of lynchings in state level models predicting White-Black voter turnout gaps. The model estimates year-specific OLS model predicting White-Black ratio in voter turnout rate for each state. The turnout rate is estimated by coun…	Gray, T. R., & Jenkins, J. A. (2024). Estimating Disenfranchisement in US Elections, 1870–1970. Perspectives on Politics, 1-21.	1	policy	actual
[truncated: 32 more rows]

## Sheet: SD8
Supplementary Data Table 8. Effect size estimates using REML method versus Hunter-Schmidt in the Stata meta analysis package
[truncated: 26 more rows]

[truncated: 2 more sheets: SD9, SD10]
